# Supplementary material for: Visible light-induced direct and highly selective C–H functionalization of quinoxalin-2(1H)-one without orientating group
Source: Royal Society of Chemistry journal article supplement (doi:10.1039/d2cy01640k), 2022-12-06
Supplement: d2cy01640k1.pdf [file d2cy01640k1.pdf]

## Visible light induced direct highly selective C-H functionalization of quinoxalin-2(1*H*)-one without orientating group

Huiqing Hou,<sup>†,a</sup> Changsheng Wang,<sup>†,c</sup> Xin Cheng,<sup>a</sup> Houzheng Chen,<sup>a</sup> Weiming Sun,<sup>a</sup> Zhiqiang Zheng<sup>\*b</sup> and Fang, Ke<sup>\*a</sup>

<sup>a</sup>*School of Pharmacy, Fujian Provincial Key Laboratory of Natural Medicine Pharmacology, Fujian Medical University, Fuzhou 350004, China. E-mail: kefang@mail.fjmu.edu.cn; Fax: +86-591-22862016; Tel: +86-591-22862016.*

<sup>b</sup>*Fujian Key Laboratory of Oral Diseases, School and Hospital of Stomatology, Fujian Medical University, Fuzhou 350000, China.*

<sup>c</sup>*Department of Spinal Surgery, The First Affiliated Hospital of Fujian Medical University, Fuzhou 350005, China.*

## Supporting information

|                                                                                      |    |
|--------------------------------------------------------------------------------------|----|
| 1. General information.....                                                          | 6  |
| 2. General procedure for the catalytic reactions .....                               | 6  |
| 3. Optimization of the reaction conditions of quinoxalin-2(1H)-ones. ....            | 6  |
| Table S1 Screening experiment of iodine, iodide and potassium salta .....            | 6  |
| Table S2 Fluorescent dye screening experimenta .....                                 | 7  |
| Table S3 Base screening experimenta .....                                            | 7  |
| Table S4 Light source screening experimenta .....                                    | 7  |
| Table S5 Time control experimenta.....                                               | 8  |
| 4. Experimental procedures and characterization data .....                           | 8  |
| 5. <sup>1</sup> H NMR、 <sup>13</sup> C NMR and ESI-MS spectra for the products ..... | 14 |
| 6. Optimized Structures and Cartesian Coordinates.....                               | 44 |

## 1. General information

All reagents were purchased from commercial sources and used without further purification. All solvents were dried in a standard manner. Reactions were monitored by TLC on silica gel plates. Column chromatography was performed over silica gel (200-300 mesh) and a petroleum ether/ethyl. Shanghai chenhua CHI600E electrochemical workstation was used in the standard configuration as delivered, including proprietary software. All products were characterized by NMR.  $^1\text{H}$  NMR spectra were recorded at 400 MHz and  $^{13}\text{C}$  NMR spectra were recorded at 101 MHz (Bruker DPX) with DMSO- $d_6$  or  $\text{CDCl}_3$  as solvent. Chemical shifts are reported in ppm using TMS as internal standard. NMR by the services provided at the Shandong Liaocheng University. HPLC were recorded on an SHIMDZU LC-20A instrument with a HP5-MS 30 m x 0.25 mm capillary apolar columns.

## 2. General procedure for the catalytic reactions

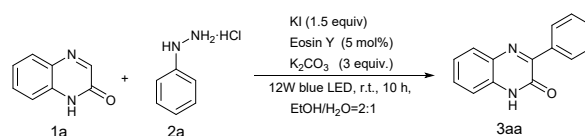

A dried 10 mL quartz tube equipped was charged with quinoxalin-2(1H)-one (0.2 mmol), phenylhydrazine (0.4 mmol), KI (0.3 mmol), Eosin Y (5 mol%),  $\text{K}_2\text{CO}_3$  (0.3 mmol) and EtOH/ $\text{H}_2\text{O}$  (v/v=2:1, 3 mL). The mixture was stirred at room temperature for 10 h under 12 W blue LED irradiation. After the reaction was completed the solution of the crude product was concentrated in vacuo, and the residue was purified by column chromatography on a silica gel (petroleum ether/ethyl acetate=3/1) to afford the target product as a white solid.

## 3. Optimization of the reaction conditions of quinoxalin-2(1H)-ones.

Table S1 Screening experiment of iodine, iodide and potassium salt<sup>a</sup>

| Entry | Variations from the standard Conditions        | Yield(%) <sup>b</sup> |
|-------|------------------------------------------------|-----------------------|
| 1     | Standard Condition                             | 88                    |
| 2     | NaI instead of KI                              | 62                    |
| 3     | TBAI instead of KI                             | 43                    |
| 4     | $\text{I}_2$ instead of KI                     | 19                    |
| 5     | $\text{K}_2\text{S}_2\text{O}_8$ instead of KI | 76                    |
| 6     | KBr instead of KI                              | 42                    |
| 7     | 0.1 mmol KI                                    | 56                    |
| 8     | 0.6 mmol KI                                    | 88                    |

<sup>a</sup>Standard Conditions: **1a** (0.2 mmol), **2a** (0.4 mmol), catalyst (0.3 mmol), Eosin Y (5 mol%),  $\text{K}_2\text{CO}_3$  (0.6 mmol), EtOH/ $\text{H}_2\text{O}$  (v/v=2:1=3 mL), 12 W blue LED at room temperature for 10 h.

<sup>b</sup>Isolated yield of **3aa** was determined by **1a**.

**Table S2 Fluorescent dye screening experiment<sup>a</sup>**

| Entry | Variations from the standard Conditions | Yield(%) <sup>b</sup> |
|-------|-----------------------------------------|-----------------------|
| 1     | <b>Standard Condition</b>               | 88                    |
| 2     | Eosin B instead of Eosin Y              | 72                    |
| 3     | Rose bengal instead of Eosin Y          | 43                    |
| 4     | Rhodamine B instead of Eosin Y          | 69                    |
| 5     | Erythrosin B instead of Eosin Y         | 46                    |
| 6     | 10 mol% Eosin Y                         | 83                    |
| 7     | 12.5 mol% Eosin Y                       | 83                    |

<sup>a</sup>Standard Conditions: **1a** (0.2 mmol), **2a** (0.4 mmol), KI (0.3 mmol), catalyst (5 mol%), K<sub>2</sub>CO<sub>3</sub> (0.6 mmol), EtOH/H<sub>2</sub>O (v/v=2:1=3 mL), 12 W blue LED at room temperature for 10 h. <sup>b</sup>Isolated yield of **3aa** was determined by **1a**.

**Table S3 Base screening experiment<sup>a</sup>**

| Entry | Variations from the standard Conditions                 | Yield(%) <sup>b</sup> |
|-------|---------------------------------------------------------|-----------------------|
| 1     | <b>Standard Condition</b>                               | 88                    |
| 2     | NaOH instead of Blue LED                                | 40                    |
| 3     | KOH instead of Blue LED                                 | 73                    |
| 4     | <i>t</i> -BuOK instead of Blue LED                      | 13                    |
| 5     | K <sub>3</sub> PO <sub>4</sub> instead of 12 W Blue LED | 72                    |
| 6     | 1.0 mmol K <sub>2</sub> CO <sub>3</sub>                 | 87                    |

<sup>a</sup>Standard Conditions: **1a** (0.2 mmol), **2a** (0.4 mmol), KI (0.3 mmol), Eosin Y (5 mol%), base (0.6 mmol), EtOH/H<sub>2</sub>O (v/v=2:1=3 mL), 12 W blue LED at room temperature for 10 h. <sup>b</sup>Isolated yield of **3aa** was determined by **1a**.

**Table S4 Light source screening experiment<sup>a</sup>**

| Entry | Variations from the standard Conditions | Yield(%) <sup>b</sup> |
|-------|-----------------------------------------|-----------------------|
| 1     | <b>Standard Condition</b>               | 88                    |
| 2     | Red LED instead of Blue LED             | 68                    |
| 3     | Green LED instead of Blue LED           | Trace                 |
| 4     | Purple LED instead of Blue LED          | 43                    |
| 5     | 32 W Blue LED instead of 12 W Blue LED  | 36                    |
| 6     | White LED instead of 12 W Blue LED      | 23                    |
| 7     | sunlight instead of 12 W Blue LED       | Trace                 |

<sup>a</sup>Standard Conditions: **1a** (0.2 mmol), **2a** (0.4 mmol), KI (0.3 mmol), Eosin Y (5 mol%), K<sub>2</sub>CO<sub>3</sub> (0.6 mmol), EtOH/H<sub>2</sub>O (v/v=2:1=3 mL), 12 W LED lamp at room temperature for 10 h. <sup>b</sup>Isolated yield of **3aa** was determined by **1a**.

**Table S5 Time control experiment<sup>a</sup>**

| Entry | Variations from the standard Conditions | Yield(%) <sup>b</sup> |
|-------|-----------------------------------------|-----------------------|
| 1     | Standard Condition                      | 88                    |
| 2     | 5 h                                     | 48                    |
| 3     | 8 h                                     | 62                    |
| 4     | 12 h                                    | 88                    |
| 5     | 24 h                                    | 16                    |

<sup>a</sup>Standard Conditions: **1a** (0.2 mmol), **2a** (0.4 mmol), KI (0.3 mmol), Eosin Y (5 mol%), K<sub>2</sub>CO<sub>3</sub> (0.6 mmol), EtOH/H<sub>2</sub>O (v/v=2:1=3 mL), 12 W blue LED lamp at room temperature, time (h).

<sup>b</sup>Isolated yield of **3aa** was determined by **1a**.

## 4. Experimental procedures and characterization data

### (**3aa**) 3-Phenylquinoxalin-2(1H)-one<sup>[1]</sup>

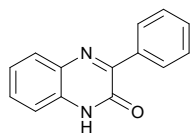

White solid. <sup>1</sup>H NMR (400 MHz, DMSO-*d*<sub>6</sub>) δ 12.56 (s, 1H), 8.35-8.23 (m, 2H), 7.82 (dd, *J*=8.1, 1.3 Hz, 1H), 7.58-7.44 (m, 4H), 7.36-7.26 (m, 2H). <sup>13</sup>C NMR (101 MHz, DMSO-*d*<sub>6</sub>) δ 154.58, 154.13, 135.62, 132.05, 132.01, 130.30, 130.18, 129.21, 128.76, 127.84, 123.37, 115.09. MS [EI, *m/z*]: 223.10 [M+H]<sup>+</sup>.

### (**3ab**) 3-(4-Bromophenyl)quinoxalin-2(1H)-one<sup>[1]</sup>

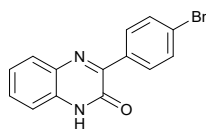

White solid. <sup>1</sup>H NMR (400 MHz, DMSO-*d*<sub>6</sub>+CDCl<sub>3</sub>) δ 12.57 (s, 1H), 8.39 (d, *J*=8.7 Hz, 2H), 7.88 (dd, *J*=8.1, 1.4 Hz, 1H), 7.65 (dd, *J*=9.0, 2.2 Hz, 2H), 7.58-7.47 (m, 1H), 7.46-7.30(m, 2H). <sup>13</sup>C NMR (101 MHz, DMSO-*d*<sub>6</sub>+CDCl<sub>3</sub>) δ 154.60, 152.60, 134.44, 132.01, 131.79, 130.71, 130.52, 129.90, 128.56, 124.04, 123.08, 114.98. MS [EI, *m/z*]: 301.00 [M+H]<sup>+</sup>.

### (**3ac**) 3-(4-Fluorophenyl)quinoxalin-2(1H)-one<sup>[1]</sup>

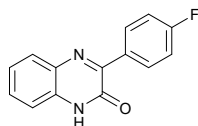

White solid. <sup>1</sup>H NMR (400 MHz, DMSO-*d*<sub>6</sub>+CDCl<sub>3</sub>) δ 12.51 (s, 1H), 8.47-8.32 (m, 2H), 7.77-7.74(m, 1H), 7.45-7.42 (m, 1H), 7.35-7.21 (m, 2H), 7.17 (t, *J*=8.8 Hz, 2H). <sup>13</sup>C NMR (101 MHz,

DMSO- $d_6$ +CDCl<sub>3</sub>)  $\delta$  154.57, 152.59, 131.92(d,  $J$ =6.8 Hz), 131.45(d,  $J$ =8.6 Hz), 129.90, 128.55, 123.14, 115.01, 114.62, 114.41. **MS** [EI,  $m/z$ ]: 241.10 [M+H]<sup>+</sup>.

**(3ad) 3-(3-Chlorophenyl)quinoxalin-2(1H)-one**<sup>[4]</sup>

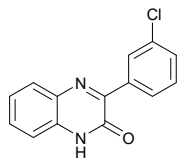

White solid. **<sup>1</sup>H NMR** (400 MHz, DMSO- $d_6$ )  $\delta$  12.59 (s, 1H), 8.32-8.31(m, 1H), 8.23-8.21(m, 1H), 7.78 (dd,  $J$ =8.1, 1.4 Hz, 1H), 7.5-7.42 (m, 3H), 7.29-7.24(m, 2H). **<sup>13</sup>C NMR** (101 MHz, DMSO- $d_6$ )  $\delta$  154.51, 152.35, 137.53, 132.67, 132.20, 131.91, 130.77, 129.94, 129.85, 128.95, 128.80, 127.75, 123.55, 115.21. **MS** [EI,  $m/z$ ]: 257.05 [M+H]<sup>+</sup>.

**(3ae) 3-(4-Nitrophenyl)quinoxalin-2(1H)-one**<sup>[3]</sup>

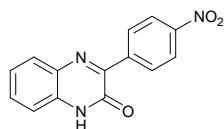

Pale yellow solid. **<sup>1</sup>H NMR** (400 MHz, DMSO- $d_6$ )  $\delta$  12.76 (s, 1H), 8.65-8.53 (m, 2H), 8.41-8.28 (m, 2H), 7.89 (dd,  $J$ =8.3, 1.4 Hz, 1H), 7.63-7.60(m, 1H), 7.39-7.35(m, 2H). **<sup>13</sup>C NMR** (101 MHz, DMSO- $d_6$ )  $\delta$  154.53, 152.22, 148.09, 141.57, 132.46, 132.00, 131.36, 130.44, 129.19, 123.72, 123.04, 115.33. **ESI-MS** calcd for C<sub>14</sub>H<sub>10</sub>N<sub>3</sub>O<sub>3</sub> [M+H]<sup>+</sup>: 268.0644; found: 268.0713.

**(3af) 3-*p*-Tolylquinoxalin-2(1H)-one**<sup>[1]</sup>

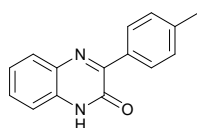

White solid. **<sup>1</sup>H NMR** (400 MHz, DMSO- $d_6$ +CDCl<sub>3</sub>)  $\delta$  12.42 (s, 1H), 8.37 - 8.17 (m, 2H), 7.79 - 7.76 (m, 1H), 7.45-7.41(m, 1H), 7.32 (dd,  $J$ =8.2, 1.4 Hz, 1H), 7.29-7.21 (m, 3H), 2.39 (s, 3H). **<sup>13</sup>C NMR** (101 MHz, DMSO- $d_6$ +CDCl<sub>3</sub>)  $\delta$  154.64, 153.69, 139.67, 132.75, 132.02, 131.68, 129.37, 128.93, 128.35, 128.11, 122.85, 114.81, 20.95. **MS** [EI,  $m/z$ ]: 259.10. [M+Na]<sup>+</sup>.

**(3ag) 3-(4-Ethylphenyl)quinoxalin-2(1H)-one**<sup>[1]</sup>

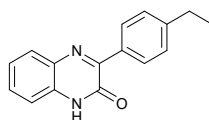

White solid. **<sup>1</sup>H NMR** (400 MHz, DMSO- $d_6$ )  $\delta$  12.54 (s, 1H), 8.27 (d,  $J$ =8.1 Hz, 2H), 7.82 (dd,  $J$ =8.0, 1.4 Hz, 1H), 7.61-7.45 (m, 1H), 7.35-7.30(m, 4H), 2.68 (q,  $J$ =7.6 Hz, 2H), 1.22 (t,  $J$ =7.6

Hz, 3H).  $^{13}\text{C}$  NMR (101 MHz, DMSO- $d_6$ )  $\delta$  155.11, 154.38, 146.75, 133.63, 132.51, 132.41, 130.55, 129.77, 129.12, 127.76, 123.82, 115.51, 28.60, 15.90. MS [EI, m/z]: 251.12 [M+H] $^+$ .

**(3ah) 3-(4-*tert*-Butylphenyl)quinoxalin-2(1H)-one**<sup>[1]</sup>

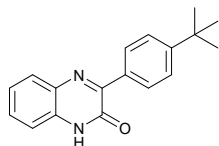

White solid.  $^1\text{H}$  NMR (400 MHz,  $\text{CDCl}_3$ )  $\delta$  12.51 (s, 1H), 8.48-8.35 (m, 2H), 7.96 (dd,  $J=8.2, 1.3$  Hz, 1H), 7.62-7.57 (m, 2H), 7.56-7.52 (m, 1H), 7.44-7.36 (m, 2H), 1.42 (s, 9H).  $^{13}\text{C}$  NMR (101 MHz,  $\text{CDCl}_3$ )  $\delta$  156.68, 154.37, 153.89, 133.40, 132.90, 131.14, 130.15, 129.39, 129.28, 125.28, 124.32, 115.48, 34.94, 31.26. MS [EI, m/z]: 279.15 [M+H] $^+$ .

**(3ai) 3-(3,5-Dimethylphenyl)quinoxalin-2(1H)-one**<sup>[3]</sup>

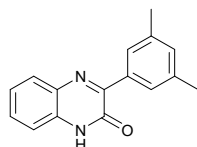

White solid.  $^1\text{H}$  NMR (400 MHz, DMSO- $d_6$ + $\text{CDCl}_3$ )  $\delta$  12.44 (s, 1H), 7.78-7.66 (m, 1H), 7.51-7.41 (m, 1H), 7.33-7.28 (m, 2H), 7.27-7.20 (m, 1H), 7.08-6.99 (m, 2H), 2.32 (d,  $J=3.4$  Hz, 3H), 2.24 (d,  $J=3.4$  Hz, 3H).  $^{13}\text{C}$  NMR (101 MHz, DMSO- $d_6$ + $\text{CDCl}_3$ )  $\delta$  158.68, 154.35, 138.08, 136.23, 133.00, 131.95, 131.85, 130.51, 129.68, 129.12, 128.37, 125.47, 122.83, 115.08, 20.76, 19.40. ESI-MS calcd for  $\text{C}_{16}\text{H}_{15}\text{N}_2\text{O}$  [M+H] $^+$ : 251.1106; found: 251.1175.

**(3aj) 3-Cyclohexylquinoxalin-2(1H)-one**<sup>[2]</sup>

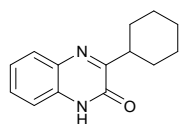

White solid.  $^1\text{H}$  NMR (400 MHz, DMSO- $d_6$ + $\text{CDCl}_3$ )  $\delta$  12.17 (s, 1H), 7.69-7.66 (m, 1H), 7.38-7.35 (m, 1H), 7.30-7.14 (m, 2H), 1.96 - 1.79 (m, 5H), 1.78-1.69 (m, 1H), 1.59-1.18 (m, 5H).  $^{13}\text{C}$  NMR (101 MHz, DMSO- $d_6$ + $\text{CDCl}_3$ )  $\delta$  164.51, 154.30, 131.75, 131.16, 128.58, 127.88, 122.47, 114.87, 29.87, 25.73, 25.59. MS [EI, m/z]: 229.15. [M+H] $^+$ .

**(3ak) 3-Isopropylquinoxalin-2(1H)-one**<sup>[2]</sup>

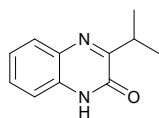

White solid.  $^1\text{H NMR}$  (400 MHz,  $\text{DMSO-}d_6+\text{CDCl}_3$ )  $\delta$  12.21 (s, 1H), 7.69 (dd,  $J=8.0, 1.4$  Hz, 1H), 7.42-7.36 (m, 1H), 7.29-7.19 (m, 2H), 3.48 (s, 1H), 1.23 (d,  $J=6.9$  Hz, 6H).  $^{13}\text{C NMR}$  (101 MHz,  $\text{DMSO-}d_6+\text{CDCl}_3$ )  $\delta$  165.27, 154.16, 131.57, 131.44, 128.80, 127.97, 122.56, 114.94, 29.73, 19.82. **ESI-MS** calcd for  $\text{C}_{11}\text{H}_{13}\text{N}_2\text{O}$   $[\text{M}+\text{H}]^+$ : 189.0950; found: 189.1019.

**(3al) 3-(Pyridin-4-yl)quinoxalin-2(1H)-one**<sup>[4]</sup>

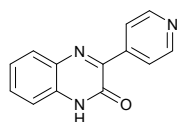

White solid.  $^1\text{H NMR}$  (400 MHz,  $\text{DMSO-}d_6+\text{CDCl}_3$ )  $\delta$  12.66 (s, 1H), 8.67 (d,  $J= 5.1$  Hz, 2H), 8.25 (d,  $J=5.0$  Hz, 2H), 7.82 (d,  $J=8.0$  Hz, 1H), 7.50 (t,  $J=7.7$  Hz, 1H), 7.39-7.24 (m, 2H).  $^{13}\text{C NMR}$  (101 MHz,  $\text{DMSO-}d_6+\text{CDCl}_3$ )  $\delta$  154.37, 151.54, 149.25, 142.31, 132.23, 131.85, 130.83, 128.96, 123.24, 122.69, 115.15. **MS** [EI,  $m/z$ ]: 224.10.  $[\text{M}+\text{H}]^+$ .

**(3am) 3-(Pyrimidin-5-yl)quinoxalin-2(1H)-one**<sup>[4]</sup>

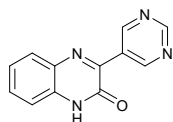

Brown solid.  $^1\text{H NMR}$  (400 MHz,  $\text{DMSO-}d_6$ )  $\delta$  12.78 (s, 1H), 9.33 (d,  $J=1.5$  Hz, 1H), 8.84 (dd,  $J=2.5, 1.5$  Hz, 1H), 8.76 (d,  $J=2.5$  Hz, 1H), 7.91-7.88(m,  $J=8.1, 1.4$  Hz, 1H), 7.65-7.61(m, 1H), 7.49-7.23 (m, 2H).  $^{13}\text{C NMR}$  (101 MHz,  $\text{DMSO-}d_6$ )  $\delta$  154.83, 153.46, 149.61, 146.34, 145.49, 145.01, 133.05, 132.58, 131.99, 129.80, 124.19, 115.96. **ESI-MS** calcd for  $\text{C}_{12}\text{H}_9\text{N}_4\text{O}$   $[\text{M}+\text{H}]^+$ : 225.0698; found: 225.0768.

**(3an) 3-(Naphthalen-2-yl)-3,4-dihydroquinoxalin-2(1H)-one**<sup>[3]</sup>

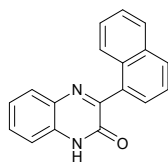

Lavender solid.  $^1\text{H NMR}$  (400 MHz,  $\text{DMSO-}d_6+\text{CDCl}_3$ )  $\delta$  12.62 (s, 1H), 7.99-7.93(m, 2H), 7.88-7.86(m, 1H), 7.82-7.77(m, 1H), 7.73 - 7.67(m, 1H), 7.61-7.38 (m, 5H), 7.35-7.27(m, 1H).  $^{13}\text{C NMR}$  (101 MHz,  $\text{DMSO-}d_6+\text{CDCl}_3$ )  $\delta$  158.4, 155.28, 134.18, 133.54, 132.78, 132.55, 131.48, 130.71, 129.71, 129.18, 128.52, 127.86, 126.58, 126.19, 125.88, 125.23, 123.60, 115.84. **MS** [EI,  $m/z$ ]: 295.10  $[\text{M}+\text{Na}]^+$ .

**(3ao) 7-Chloro-3-phenylquinoxalin-2(1H)-one**<sup>[1]</sup>



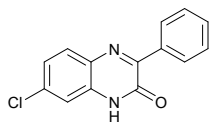

White solid.  $^1\text{H NMR}$  (400 MHz,  $\text{DMSO-}d_6+\text{CDCl}_3$ )  $\delta$  12.53 (s, 1H), 8.38-8.19 (m, 2H), 7.72 (d,  $J=8.6$  Hz, 1H), 7.50-7.34 (m, 3H), 7.29 (d,  $J=2.2$  Hz, 1H), 7.20 (dd,  $J=8.6, 2.3$  Hz, 1H).  $^{13}\text{C NMR}$  (101 MHz,  $\text{DMSO-}d_6+\text{CDCl}_3$ )  $\delta$  154.35, 154.02, 135.17, 134.55, 132.75, 130.65, 129.95, 129.89, 128.99, 127.49, 123.20, 114.31. **MS** [EI,  $m/z$ ]: 279.05  $[\text{M}+\text{Na}]^+$ .

**(3ap) 7-Nitro-3-phenylquinoxalin-2(1H)-one<sup>[1]</sup>**

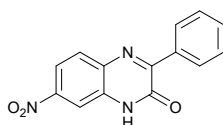

White solid.  $^1\text{H NMR}$  (400 MHz,  $\text{DMSO-}d_6+\text{CDCl}_3$ )  $\delta$  12.88 (s, 1H), 8.43-8.35 (m, 2H), 8.18 (d,  $J=2.5$  Hz, 1H), 8.11-8.04 (m, 2H), 7.55-7.46 (m, 3H).  $^{13}\text{C NMR}$  (101 MHz,  $\text{DMSO-}d_6+\text{CDCl}_3$ )  $\delta$  157.29, 154.20, 146.90, 135.38, 134.70, 132.07, 130.78, 129.66, 129.40, 127.61, 117.17, 110.55. **MS** [EI,  $m/z$ ]: 268.10  $[\text{M}+\text{H}]^+$ .

**(3aq) 7-Bromo-3-phenylquinoxalin-2(1H)-one<sup>[1]</sup>**

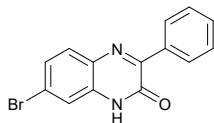

White solid.  $^1\text{H NMR}$  (400 MHz,  $\text{DMSO-}d_6+\text{CDCl}_3$ )  $\delta$  12.59 (s, 1H), 8.31-8.28 (m, 3H), 7.91 (dd,  $J=4.8, 2.2$  Hz, 1H), 7.55-7.52 (m,  $J=8.7, 4.8, 2.2$  Hz, 1H), 7.46-7.43 (m, 2H), 7.26-7.22 (m, 1H).  $^{13}\text{C NMR}$  (101 MHz,  $\text{DMSO-}d_6+\text{CDCl}_3$ )  $\delta$  155.04, 154.30, 135.09, 132.87, 132.24, 131.06, 130.55, 130.11, 129.10, 127.50, 116.67, 114.58. **MS** [EI,  $m/z$ ]: 300.05  $[\text{M}+\text{H}]^+$ .

**(3ar) 3-Phenyl-7-(trifluoromethyl)quinoxalin-2(1H)-one<sup>[1]</sup>**

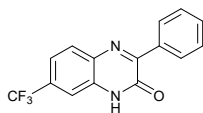

White solid.  $^1\text{H NMR}$  (400 MHz,  $\text{DMSO-}d_6$ )  $\delta$  12.75 (s, 1H), 8.33 (d,  $J=7.4$  Hz, 2H), 8.01 (d,  $J=8.3$  Hz, 1H), 7.63-7.47 (m, 5H).  $^{13}\text{C NMR}$  (101 MHz,  $\text{DMSO-}d_6$ )  $\delta$  157.25, 154.86, 135.58, 134.35, 132.66, 131.29, 130.40, 130.11, 129.94, 129.84, 129.79, 128.39, 125.59, 122.89, 119.79, 112.69. **MS** [EI,  $m/z$ ]: 291.05  $[\text{M}+\text{H}]^+$ .

**(3as) 3-Oxo-2-phenyl-3,4-dihydroquinoxaline-6-carbonitrile<sup>[1]</sup>**

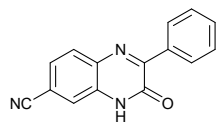

White solid.  $^1\text{H NMR}$  (400 MHz,  $\text{DMSO-}d_6$ )  $\delta$  12.84 (s, 1H), 8.34-8.27 (m, 3H), 7.89 (dd,  $J = 8.5, 1.8$  Hz, 1H), 7.57-7.48 (m, 3H), 7.43 (d,  $J = 8.5$  Hz, 1H).  $^{13}\text{C NMR}$  (101 MHz,  $\text{DMSO-}d_6$ )  $\delta$  156.55, 154.94, 136.16, 135.43, 133.77, 133.20, 131.95, 131.24, 129.85, 128.41, 118.96, 116.94, 105.93. **ESI-MS** calcd for  $\text{C}_{15}\text{H}_{10}\text{N}_3\text{O}$   $[\text{M}+\text{H}]^+$ : 300.00; found: 248.0850.

**(3at) 7-Methoxy-3-phenylquinoxalin-2(1H)-one<sup>[1]</sup>**

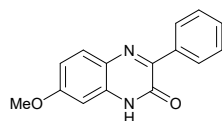

White solid.  $^1\text{H NMR}$  (400 MHz,  $\text{DMSO-}d_6+\text{CDCl}_3$ )  $\delta$  12.34 (s, 1H), 8.33-8.22 (m, 2H), 7.66 (d,  $J=8.9$  Hz, 1H), 7.42-7.33 (m, 3H), 6.83 (d,  $J=8.9$  Hz, 1H), 6.76 (d,  $J=2.7$  Hz, 1H), 3.83 (s, 3H).  $^{13}\text{C NMR}$  (101 MHz,  $\text{DMSO-}d_6+\text{CDCl}_3$ )  $\delta$  160.60, 154.90, 150.30, 135.73, 133.39, 129.75, 129.14, 128.63, 127.37, 127.10, 111.95, 97.10, 55.21. **MS** [EI,  $m/z$ ]: 275.10  $[\text{M}+\text{Na}]^+$ .

**(3au) 7-Methyl-3-phenylquinoxalin-2(1H)-one<sup>[1]</sup>**

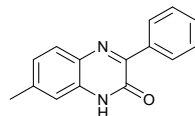

White solid.  $^1\text{H NMR}$  (400 MHz,  $\text{DMSO-}d_6$ )  $\delta$  12.48 (s, 1H), 8.34-8.27 (m, 2H), 7.72-7.63 (m, 1H), 7.49 (dt,  $J = 5.3, 2.5$  Hz, 3H), 7.38-7.10 (m, 2H), 2.40 (d,  $J = 8.9$  Hz, 3H).  $^{13}\text{C NMR}$  (101 MHz,  $\text{DMSO-}d_6$ )  $\delta$  155.20, 153.32, 141.09, 136.22, 132.46, 130.79, 130.43, 129.56, 128.98, 128.29, 125.28, 115.15, 21.80. **MS** [EI,  $m/z$ ]: 237.10  $[\text{M}+\text{H}]^+$ .

**(3av) 6,7-Dimethyl-3-phenylquinoxalin-2(1H)-one<sup>[4]</sup>**

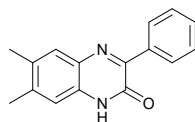

White solid.  $^1\text{H NMR}$  (400 MHz,  $\text{DMSO-}d_6+\text{CDCl}_3$ )  $\delta$  12.30 (d,  $J=3.8$  Hz, 1H), 8.53-8.20 (m, 2H), 7.57 (d,  $J=4.2$  Hz, 1H), 7.46-7.40 (m, 3H), 7.12-7.06 (m, 1H), 2.36-2.32 (m,  $J=8.2, 2.8$  Hz, 6H).  $^{13}\text{C NMR}$  (101 MHz,  $\text{DMSO-}d_6+\text{CDCl}_3$ )  $\delta$  155.35, 153.21, 140.12, 136.33, 132.30, 131.25, 130.38, 129.90, 129.35, 128.96, 127.94, 115.56, 20.26, 19.50. **MS** [EI,  $m/z$ ]: 273.10  $[\text{M}+\text{Na}]^+$ .

**(3aw) 6,7-Dichloro-3-phenylquinoxalin-2(1H)-one<sup>[4]</sup>**

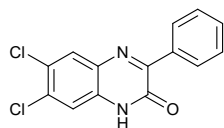

White solid.  $^1\text{H NMR}$  (400 MHz,  $\text{DMSO-}d_6$ )  $\delta$  12.64 (s, 1H), 8.28 (dt,  $J = 6.8, 1.6$  Hz, 2H), 8.03 (s, 1H), 7.56-7.44 (m, 4H).  $^{13}\text{C NMR}$  (101 MHz,  $\text{DMSO-}d_6$ )  $\delta$  160.84, 159.38, 140.23, 137.40, 137.08, 136.66, 135.93, 134.79, 134.59, 133.13, 130.32, 121.30. **MS** [EI,  $m/z$ ]: 291.10  $[\text{M}+\text{H}]^+$ .

**(3ax) 6,7-Dimethyl-3-*p*-tolylquinoxalin-2(1H)-one**<sup>[4]</sup>

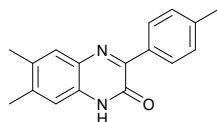

White solid.  $^1\text{H NMR}$  (400 MHz,  $\text{DMSO-}d_6$ )  $\delta$  12.40 (s, 1H), 8.24 (d,  $J=7.9$  Hz, 2H), 7.59 (s, 1H), 7.28 (d,  $J=7.9$  Hz, 2H), 7.08 (s, 1H), 2.37 (s, 3H), 2.30 (d,  $J=8.3$  Hz, 6H).  $^{13}\text{C NMR}$  (101 MHz,  $\text{DMSO-}d_6$ )  $\delta$  154.72, 152.45, 139.74, 139.70, 133.15, 132.04, 130.59, 129.99, 129.03, 128.47 (d,  $J=3.3$  Hz), 115.03, 21.04, 19.82, 18.96. **MS** [EI,  $m/z$ ]: 287.15.  $[\text{M}+\text{Na}]^+$ .

**(3ay) 2-Phenylpyrido[3,2-*b*]pyrazin-3(4H)-one**<sup>[2]</sup>

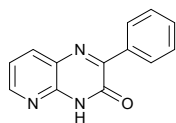

White solid.  $^1\text{H NMR}$  (400 MHz,  $\text{DMSO-}d_6+\text{CDCl}_3$ )  $\delta$  12.87 (s, 1H), 8.22-8.16 (m, 2H), 8.07 (dd,  $J = 8.0, 1.7$  Hz, 1H), 7.40-7.30 (m, 4H), 7.22 (dd,  $J = 7.9, 4.7$  Hz, 1H).  $^{13}\text{C NMR}$  (101 MHz,  $\text{DMSO-}d_6+\text{CDCl}_3$ )  $\delta$  155.77, 155.19, 149.83, 143.61, 136.36, 135.00, 132.33, 130.22, 129.21, 129.08, 128.03, 127.58, 119.45. **ESI-MS** calcd for  $\text{C}_{13}\text{H}_{10}\text{N}_3\text{O}$   $[\text{M}+\text{H}]^+$ : 224.0746; found: 224.0818.

**(3az) 4-methyl-3-oxo-2-phenyl-3,4-dihydroquinoxaline-6-carbonitrile**<sup>[1]</sup>

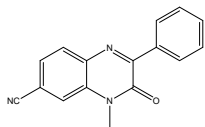

White solid.  $^1\text{H NMR}$  (400 MHz,  $\text{DMSO-}d_6$ )  $\delta$  8.36 (d,  $J = 1.9$  Hz, 1H), 8.23 (s, 1H), 8.04 (d,  $J = 2.0$  Hz, 1H), 7.74 (d,  $J = 8.7$  Hz, 1H), 7.53 (s, 2H), 3.69 (s, 5H).  $^{13}\text{C NMR}$  (101 MHz,  $\text{DMSO-}d_6$ )  $\delta$  175.00, 155.44, 154.39, 137.23, 135.73, 134.24, 133.42, 132.31, 131.21, 130.12, 129.94, 128.41, 116.78, 106.21, 30.08. **MS** [EI,  $m/z$ ]: 262.10  $[\text{M}+\text{H}]^+$ .

References

- [1] Ebersol C, Rocha N, Penteadó F, *et al.* A niobium-catalyzed coupling reaction of  $\alpha$ -keto acids with ortho-phenylenediamines: synthesis of 3-arylquinoxalin-2(1H)-ones[J]. Green

Chemistry, 2019, 21: 6154-6160.

- [2] Lian F, Wang W, Zhang H, *et al.* Nickel-catalyzed electrochemical reductive decarboxylative coupling of *N*-hydroxyphthalimide esters with quinoxalinones[J]. Chemical Communications, 2019, 55, 14685-14688.
- [3] Kristoffersen T, Elumalai V, Starck E, *et al.* Microwave-assisted synthesis of heterocycles from aryldiazoacetates[J]. European Journal of Organic Chemistry, 2020, 2020 (45): 7069-7078.
- [4] Wen J W, Yang X T, Yan K L, *et al.* Electroreductive C3 pyridylation of quinoxalin-2(1*H*)-ones: an effective way to access bidentate nitrogen ligands[J]. Organic Letters, 2021, 23, 1081-1085.



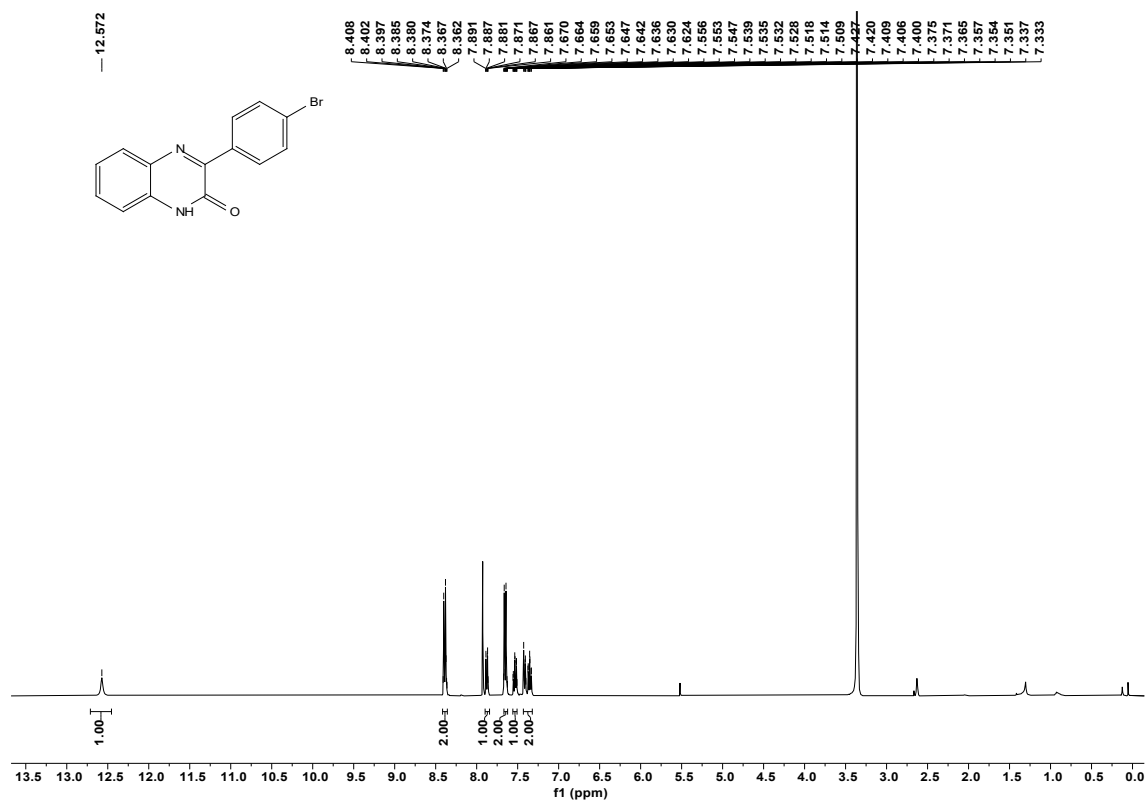

**<sup>1</sup>H NMR Spectrum of 3-(4-Bromophenyl)quinoxalin-2(1H)-one (Solvent: DMSO-*d*<sub>6</sub>+CDCl<sub>3</sub>)**

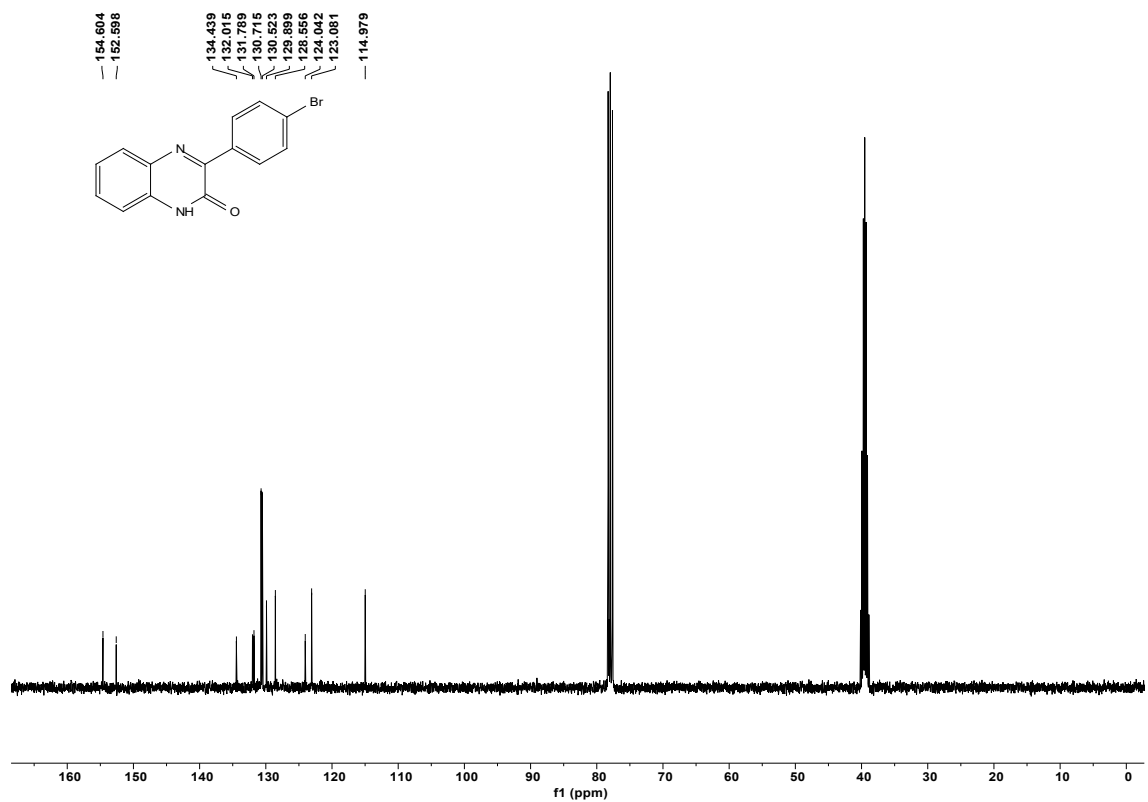

**<sup>13</sup>C NMR Spectrum of 3-(4-Bromophenyl)quinoxalin-2(1H)-one (Solvent: DMSO-*d*<sub>6</sub>+CDCl<sub>3</sub>)**

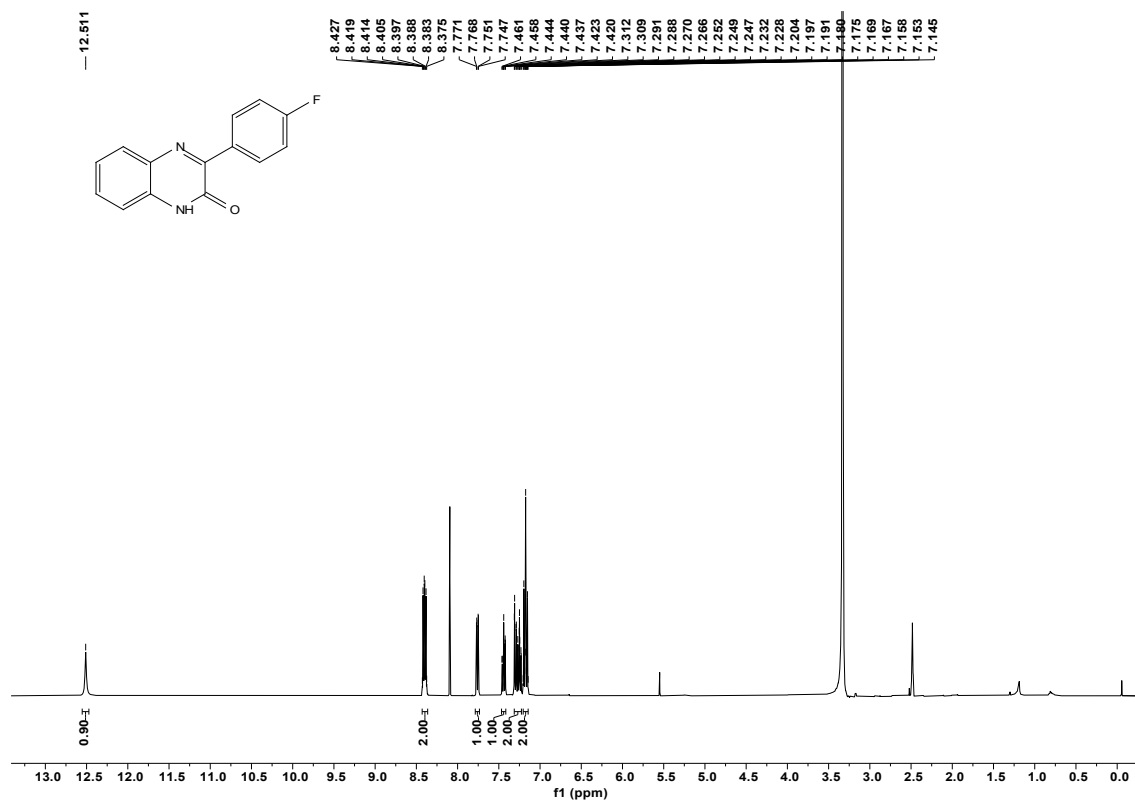

<sup>1</sup>H NMR Spectrum of 3-(4-Fluorophenyl)quinoxalin-2(1H)-one (Solvent: DMSO-*d*<sub>6</sub>+CDCl<sub>3</sub>)

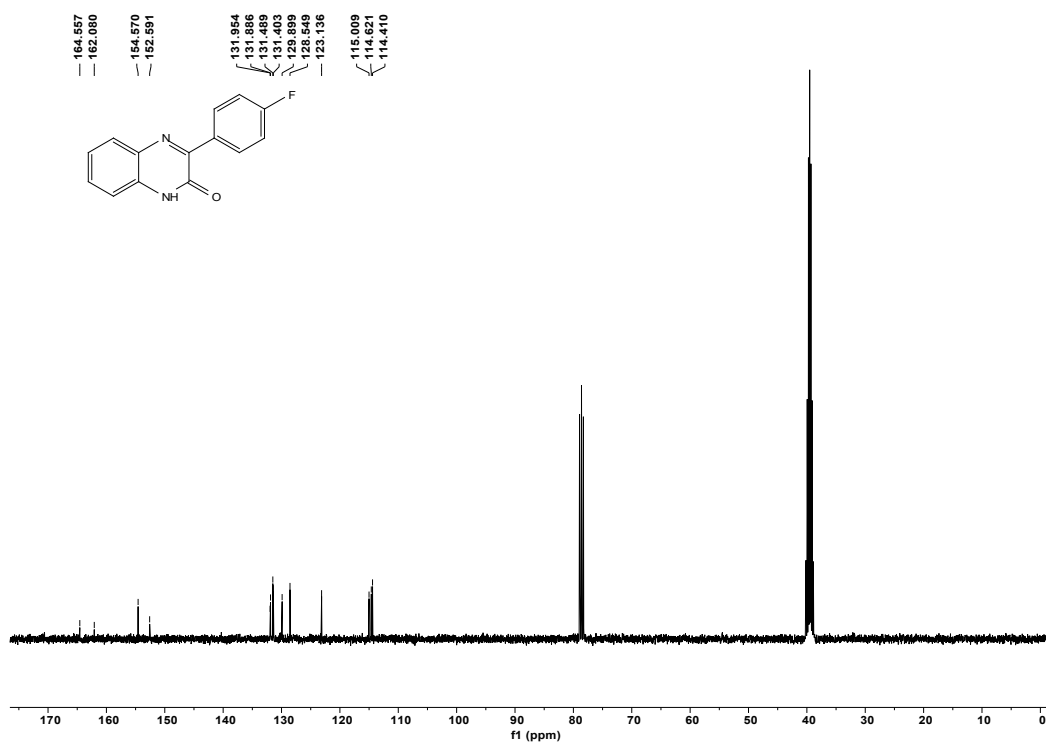

<sup>13</sup>C NMR Spectrum of 3-(4-Fluorophenyl)quinoxalin-2(1H)-one (Solvent: DMSO-*d*<sub>6</sub>+CDCl<sub>3</sub>)

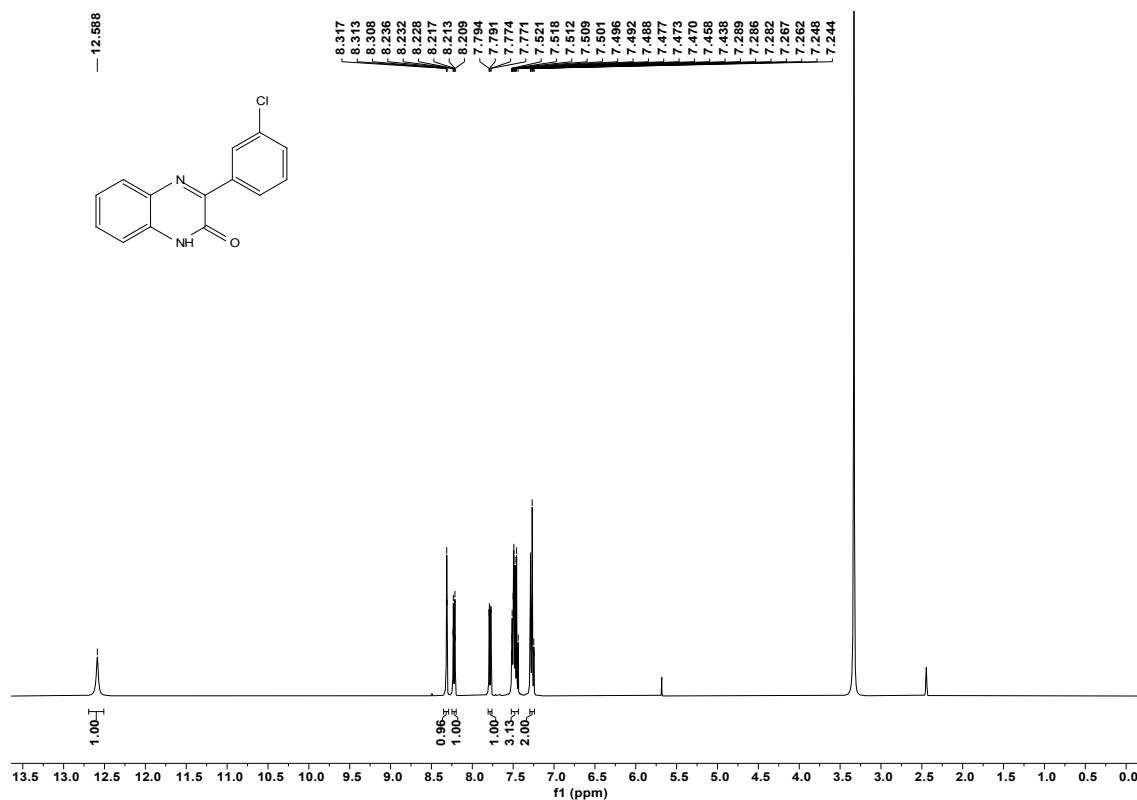

**<sup>1</sup>H NMR Spectrum of 3-(3-Chlorophenyl)quinoxalin-2(1H)-one (Solvent: DMSO-*d*<sub>6</sub>)**

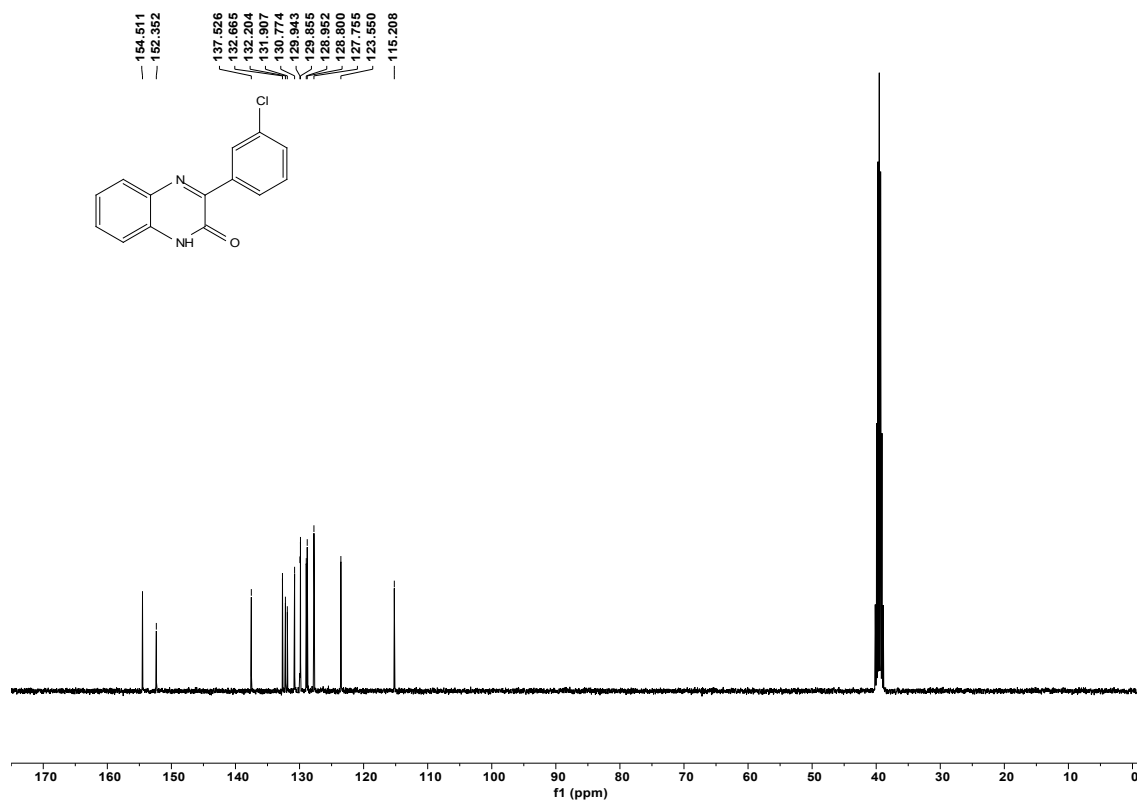

**<sup>13</sup>C NMR Spectrum of 3-(3-Chlorophenyl)quinoxalin-2(1H)-one (Solvent: DMSO-*d*<sub>6</sub>)**



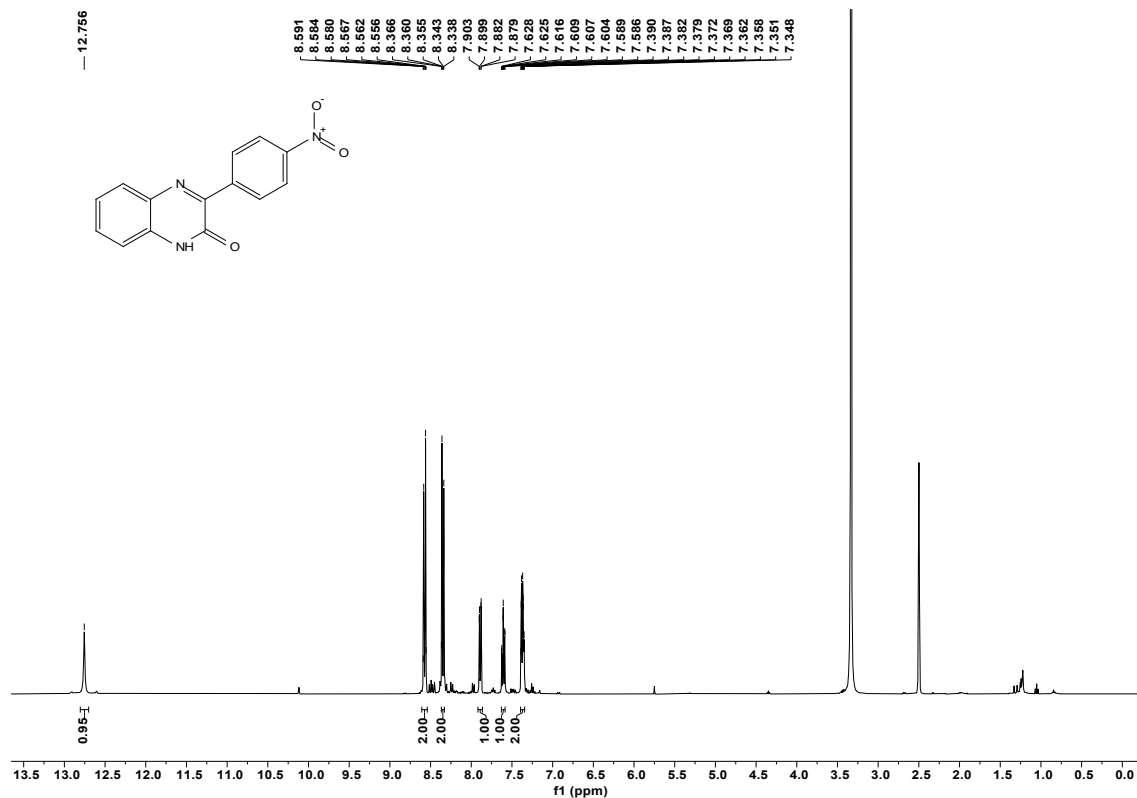

**<sup>1</sup>H NMR Spectrum of 3-(4-Nitrophenyl)quinoxalin-2(1H)-one (Solvent: DMSO-*d*<sub>6</sub>)**

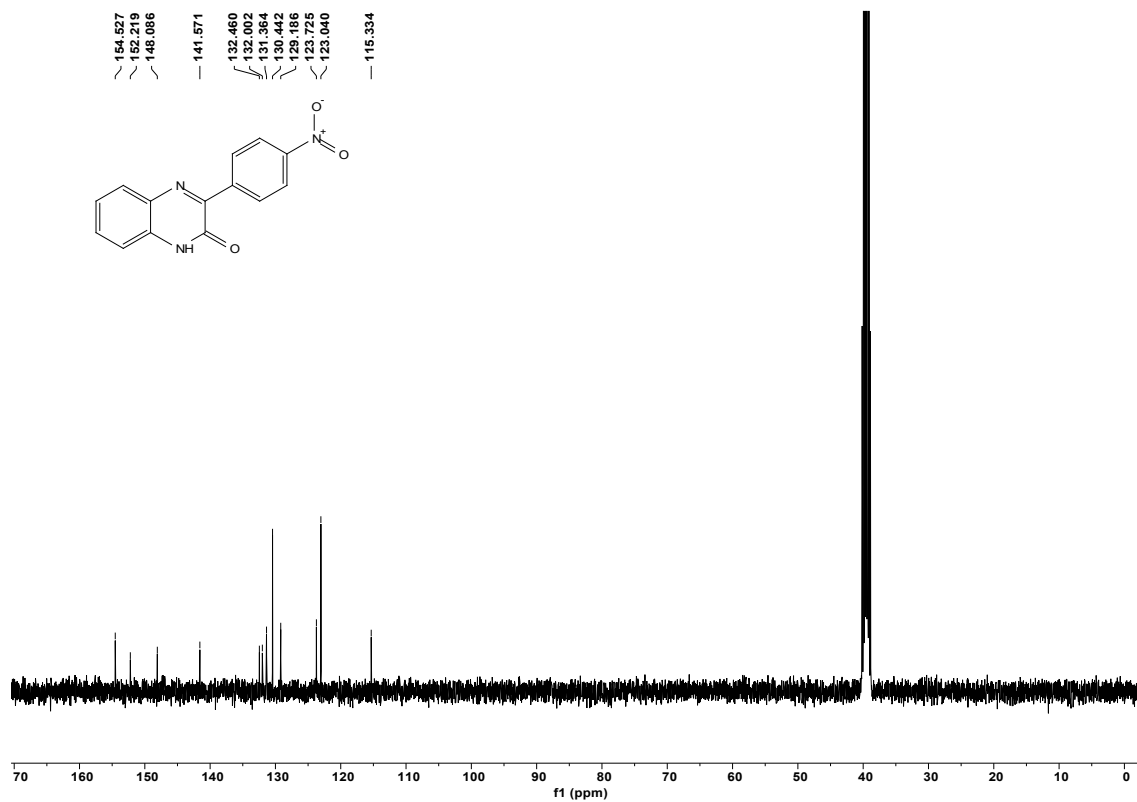

**<sup>13</sup>C NMR Spectrum of 3-(4-Nitrophenyl)quinoxalin-2(1H)-one (Solvent: DMSO-*d*<sub>6</sub>)**

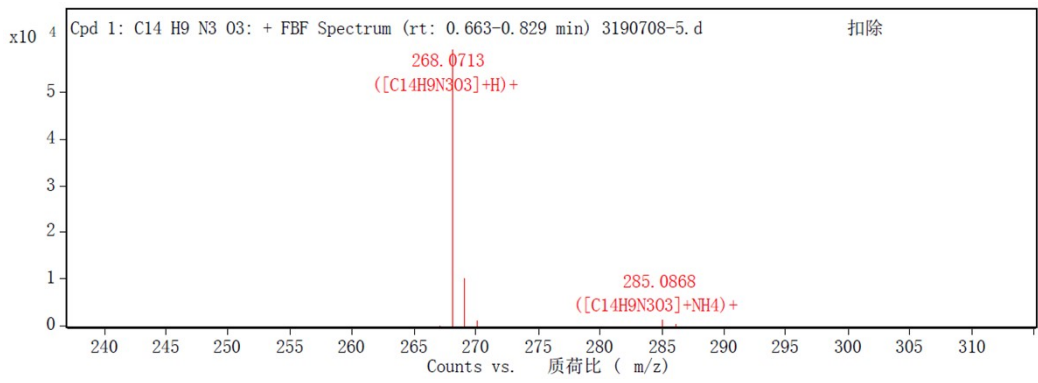

**ESI-MS Spectrum of 3-(4-Nitrophenyl)quinoxalin-2(1H)-one**

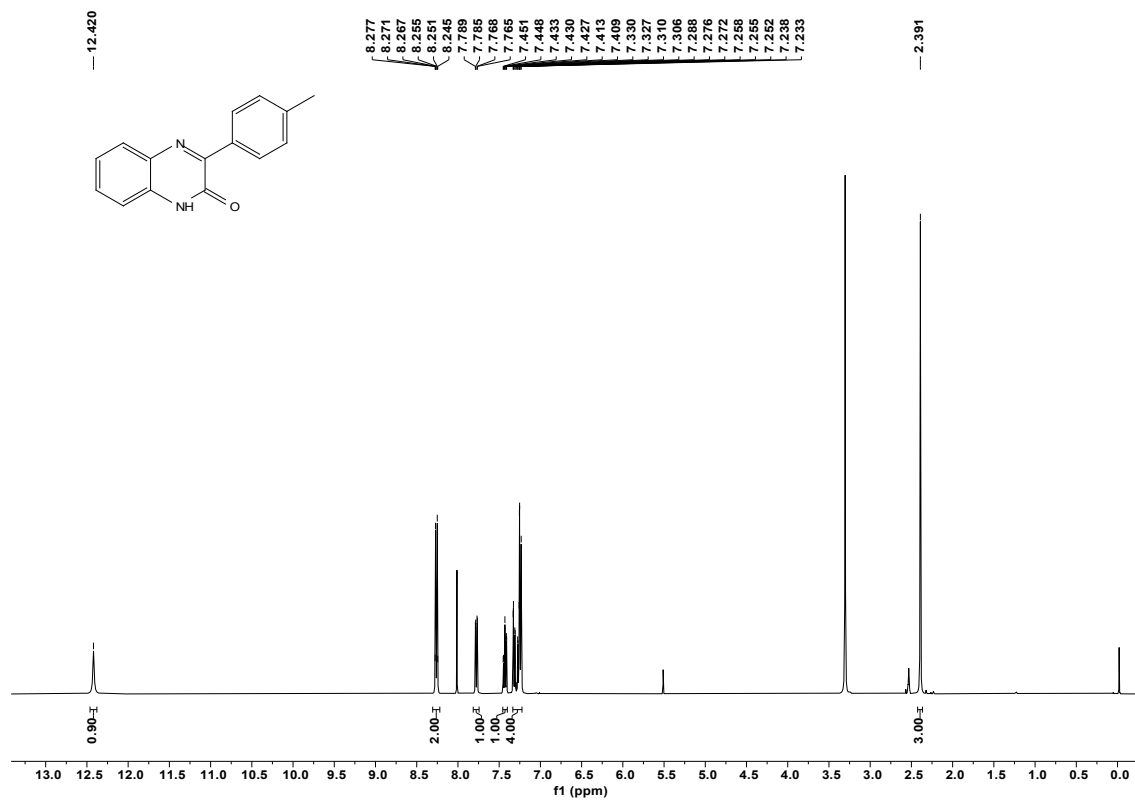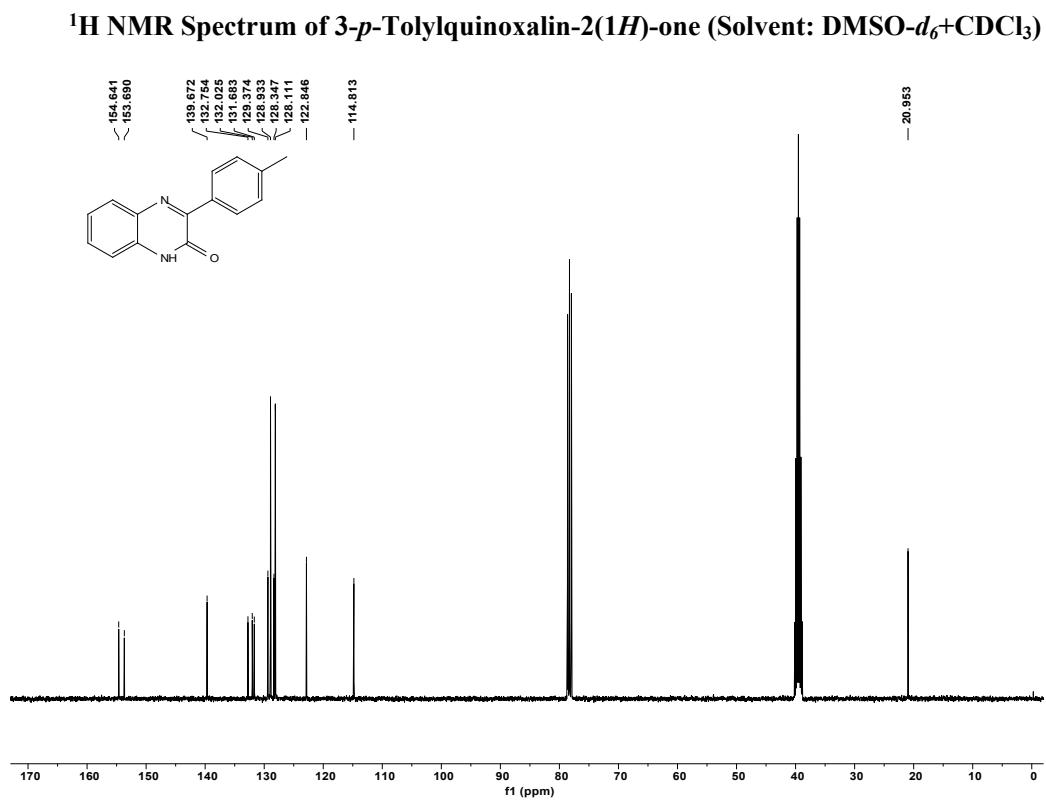

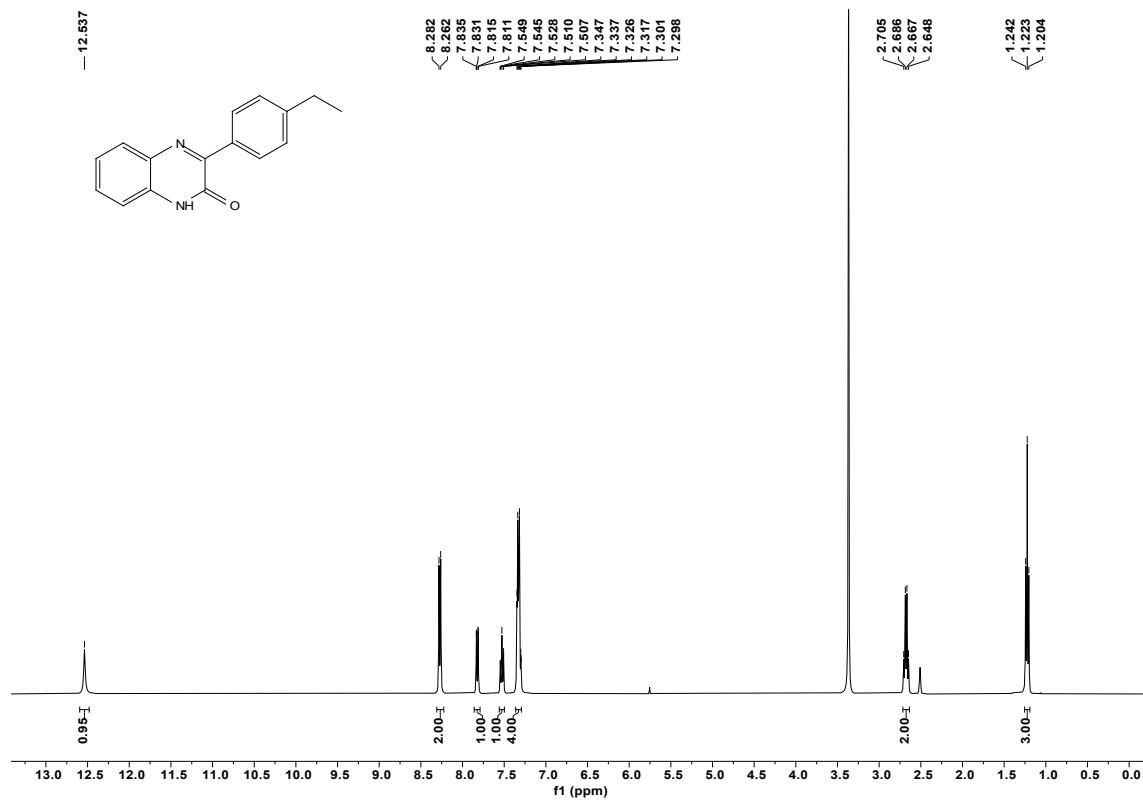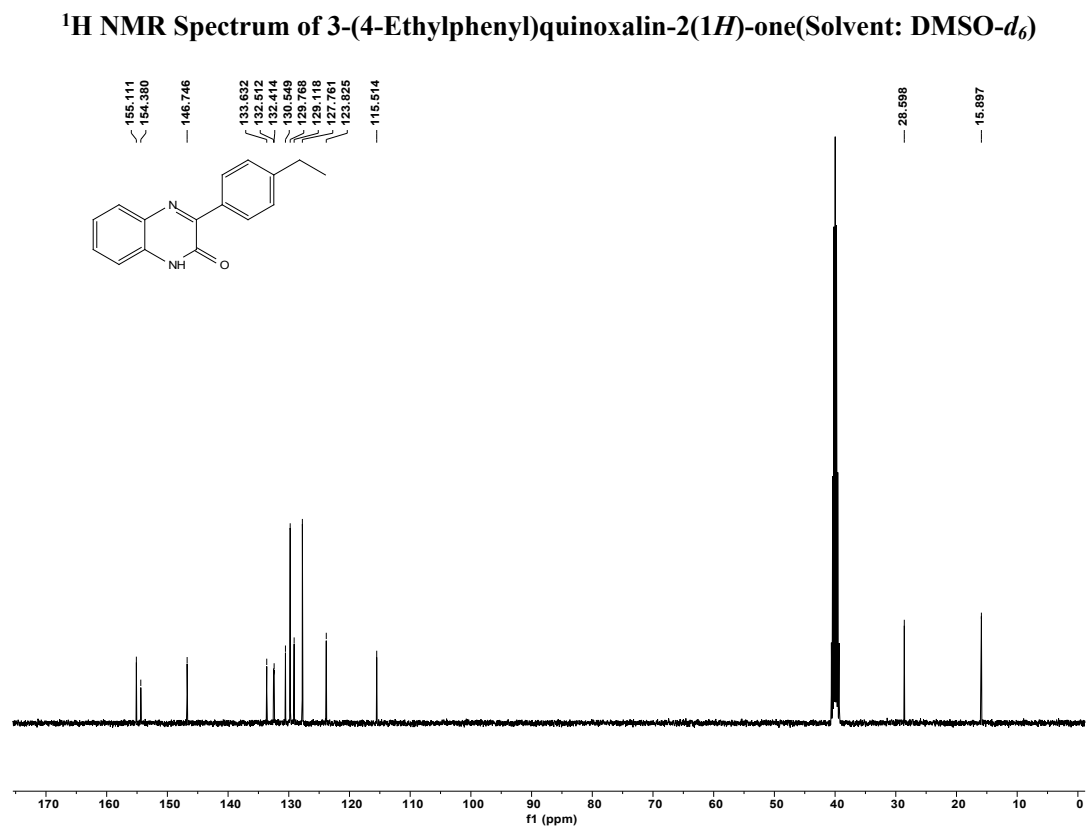

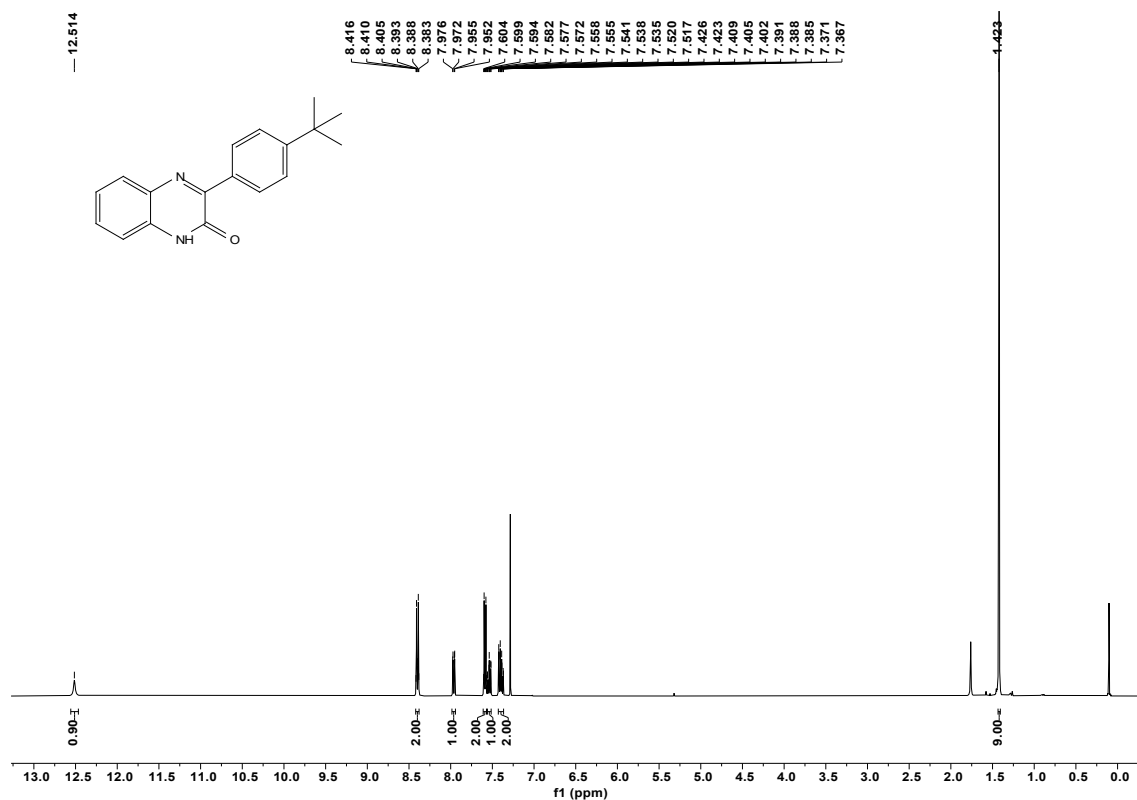

**<sup>1</sup>H NMR Spectrum of 3-(4-*tert*-Butylphenyl)quinoxalin-2(1*H*)-one (Solvent: CDCl<sub>3</sub>)**

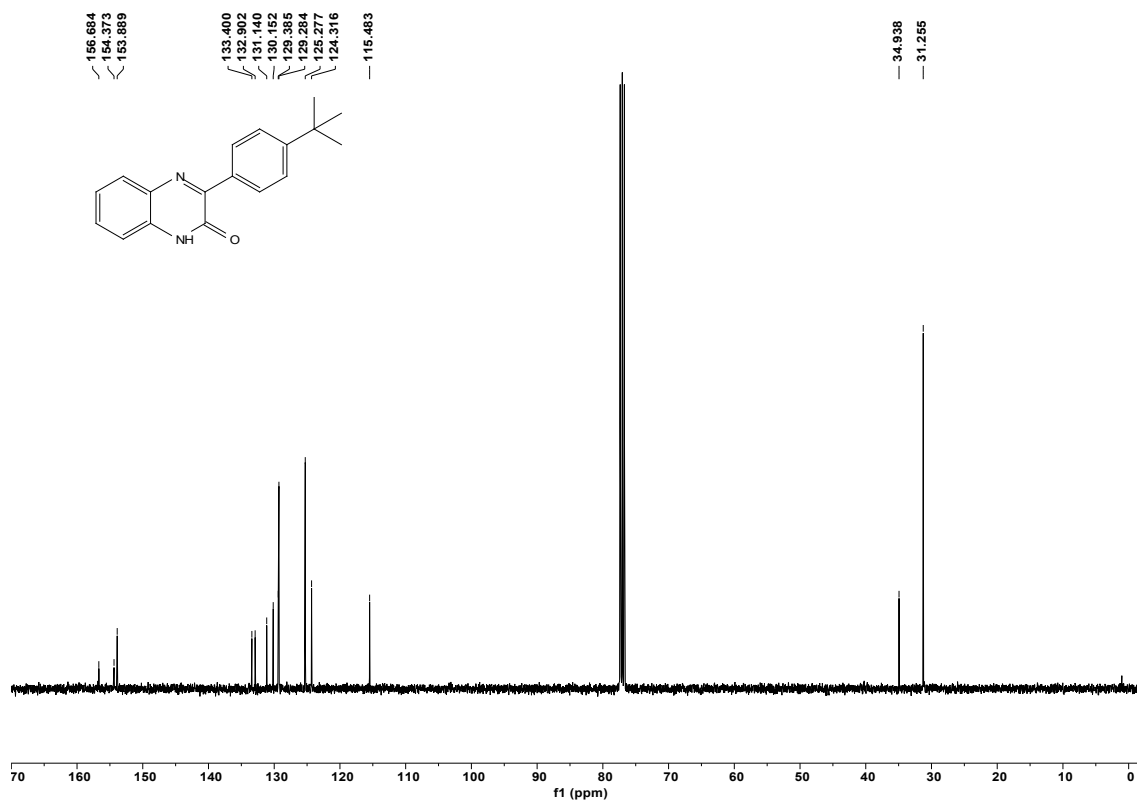

**<sup>13</sup>C NMR Spectrum of 3-(4-*tert*-Butylphenyl)quinoxalin-2(1*H*)-one (Solvent: CDCl<sub>3</sub>)**

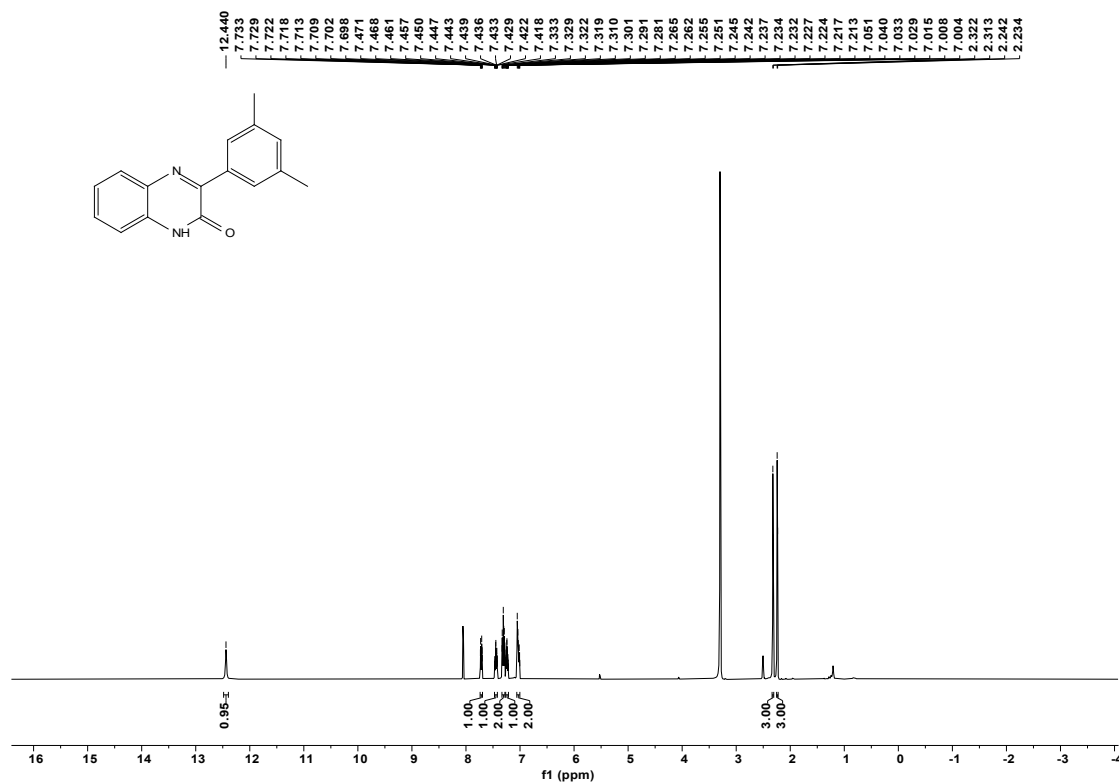

<sup>1</sup>H NMR Spectrum of 3-(3,5-Dimethylphenyl)quinoxalin-2(1H)-one (Solvent: DMSO-*d*<sub>6</sub>+CDCl<sub>3</sub>)

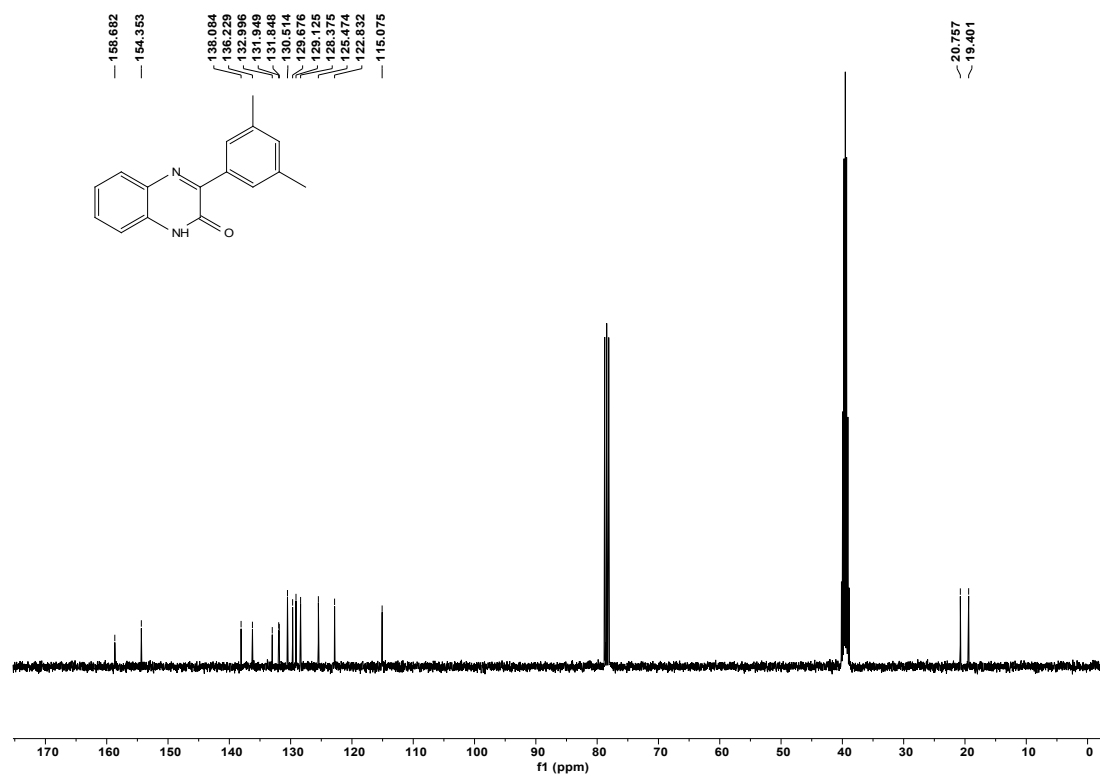

<sup>13</sup>C NMR Spectrum of 3-(3,5-Dimethylphenyl)quinoxalin-2(1H)-one (Solvent: DMSO-*d*<sub>6</sub>+CDCl<sub>3</sub>)

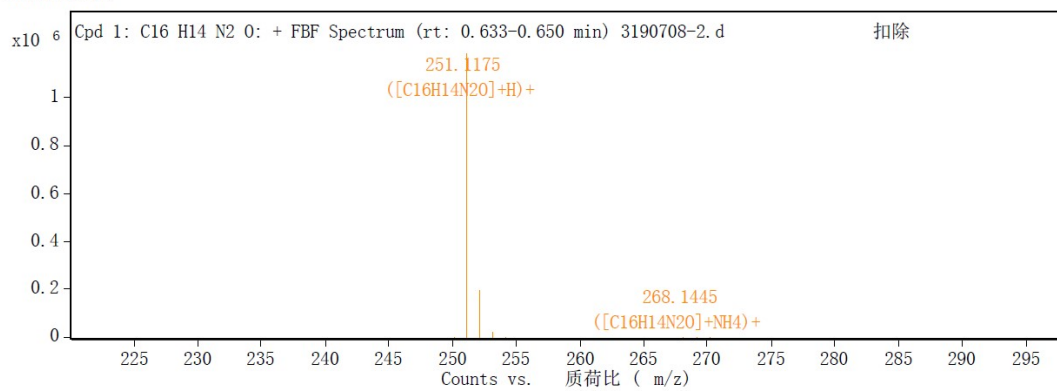

**ESI-MS Spectrum of 3-(3,5-Dimethylphenyl)quinoxalin-2(1H)-one**

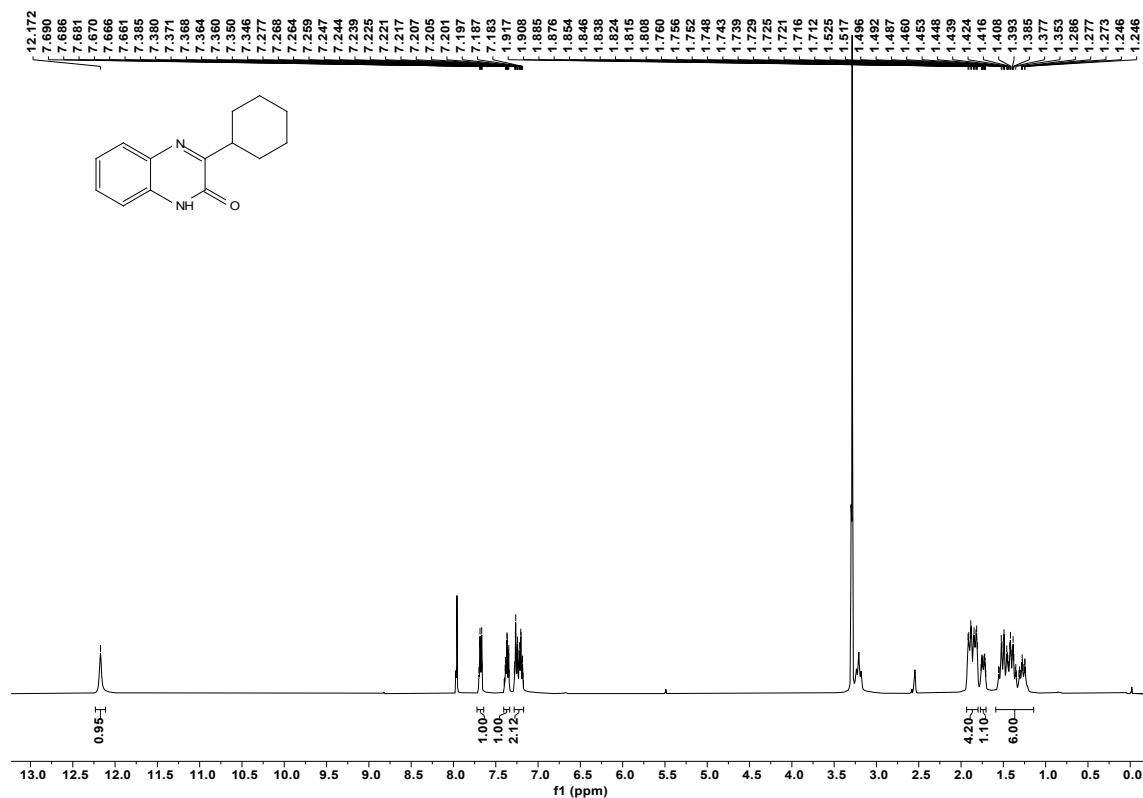

<sup>1</sup>H NMR Spectrum of 3-Cyclohexylquinoxalin-2(1H)-one (Solvent: DMSO-*d*<sub>6</sub>+CDCl<sub>3</sub>)

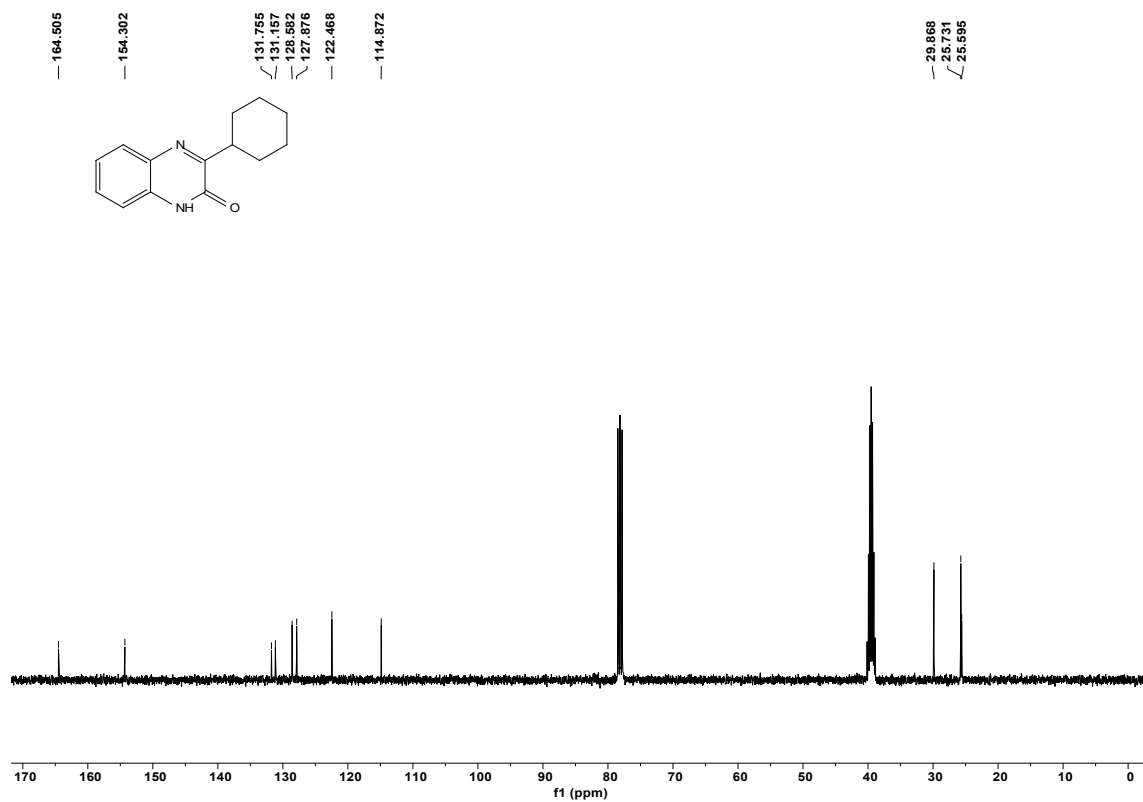

<sup>13</sup>C NMR Spectrum of 3-Cyclohexylquinoxalin-2(1H)-one (Solvent: DMSO-*d*<sub>6</sub>+CDCl<sub>3</sub>)



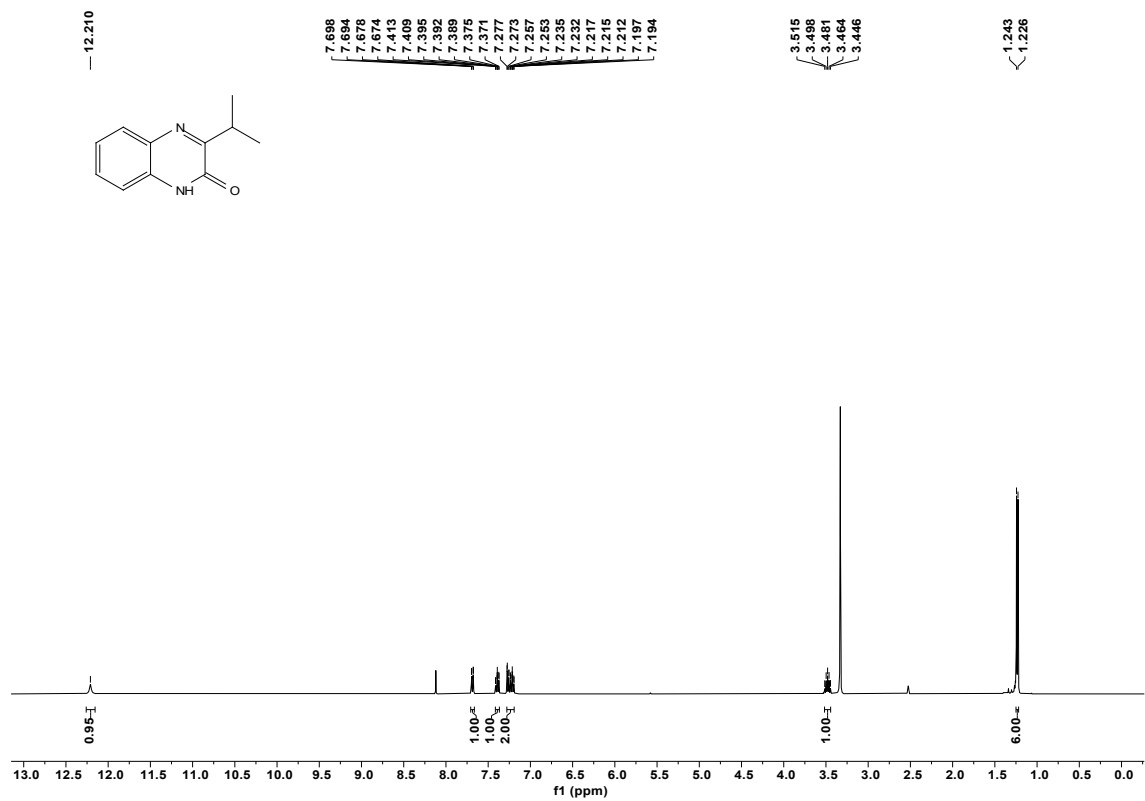

**<sup>1</sup>H NMR Spectrum of 3-Isopropylquinoxalin-2(1H)-one (Solvent: DMSO-*d*<sub>6</sub>+CDCl<sub>3</sub>)**

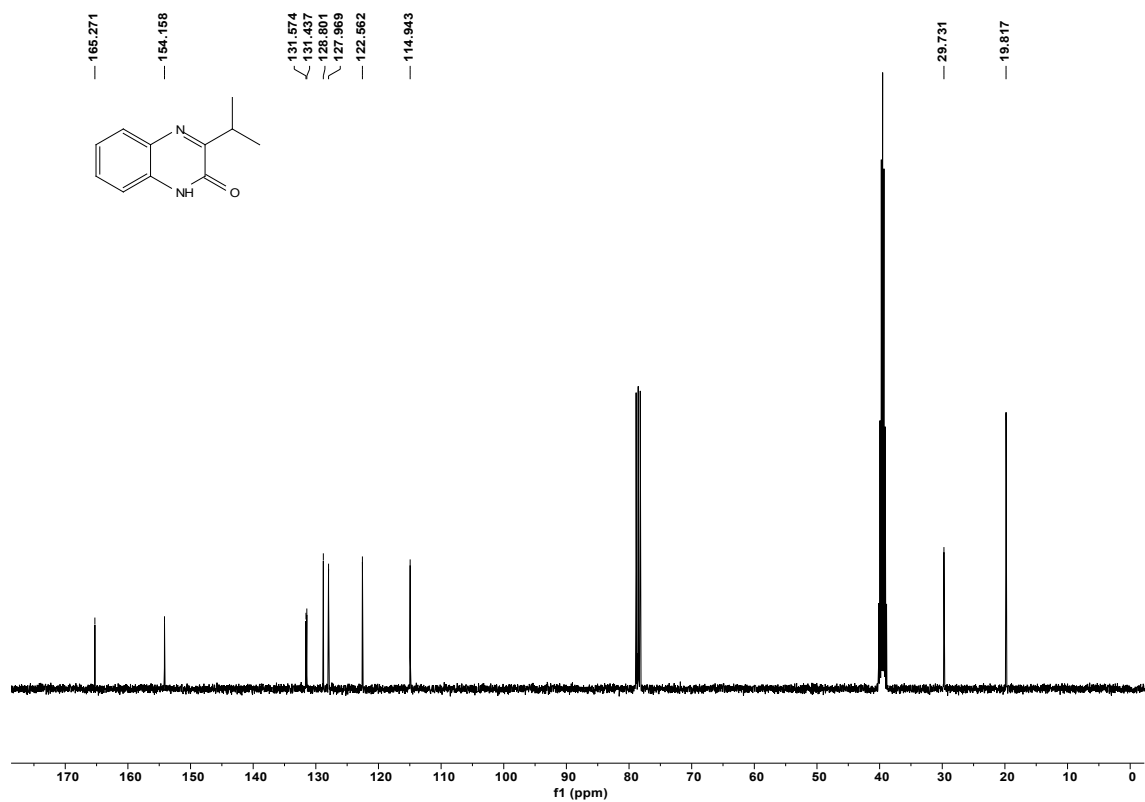

**<sup>13</sup>C NMR Spectrum of 3-Isopropylquinoxalin-2(1H)-one (Solvent: DMSO-*d*<sub>6</sub>+CDCl<sub>3</sub>)**

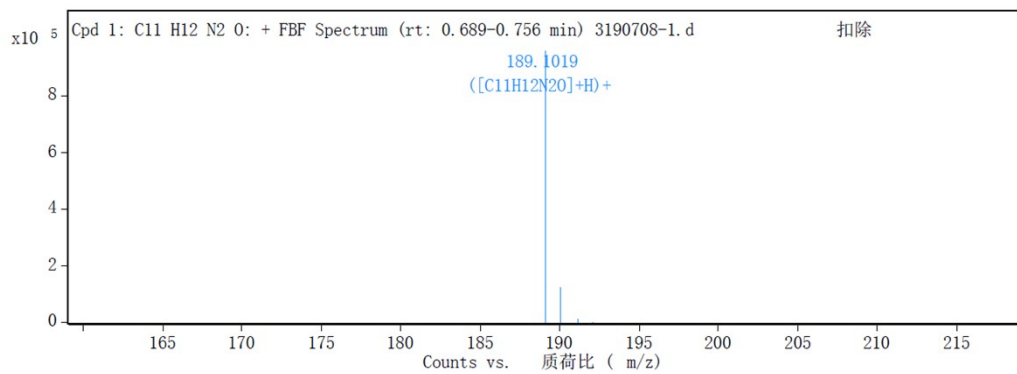

**ESI-MS Spectrum of 3-Isopropylquinoxalin-2(1H)-one**

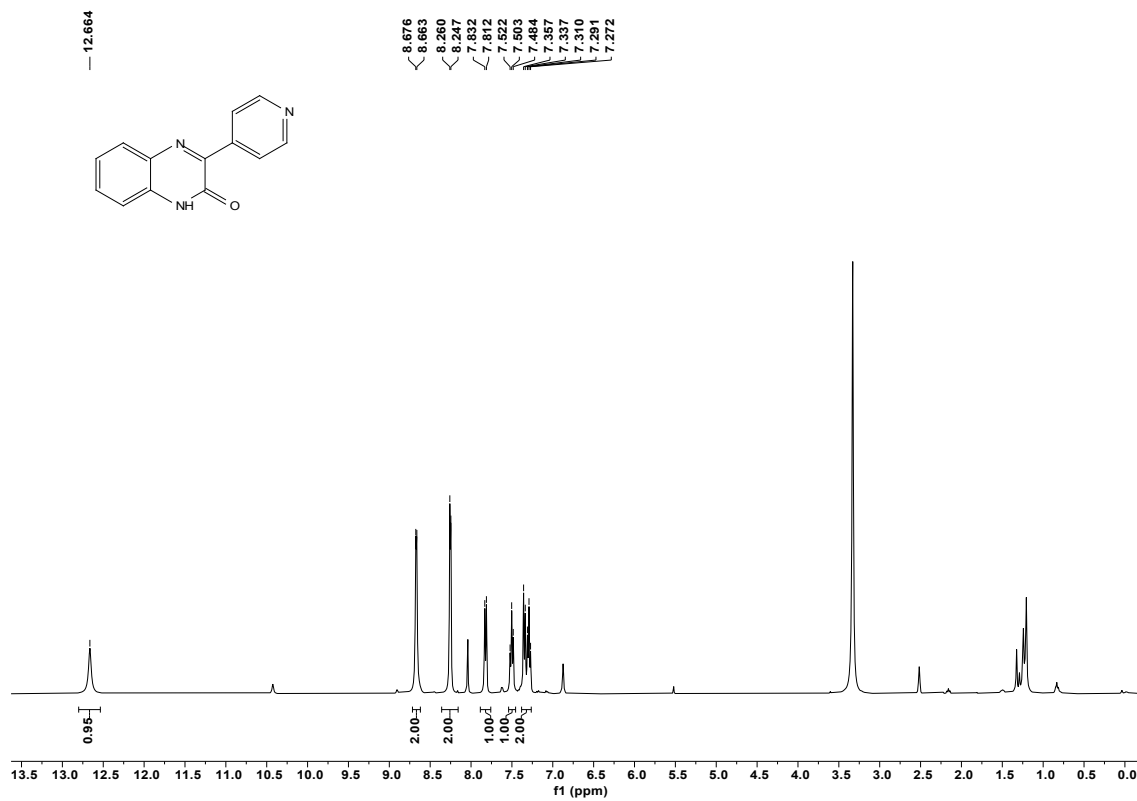

$^1\text{H}$  NMR Spectrum of 3-(Pyridin-4-yl)quinoxalin-2(1H)-one (Solvent:  $\text{DMSO-}d_6+\text{CDCl}_3$ )

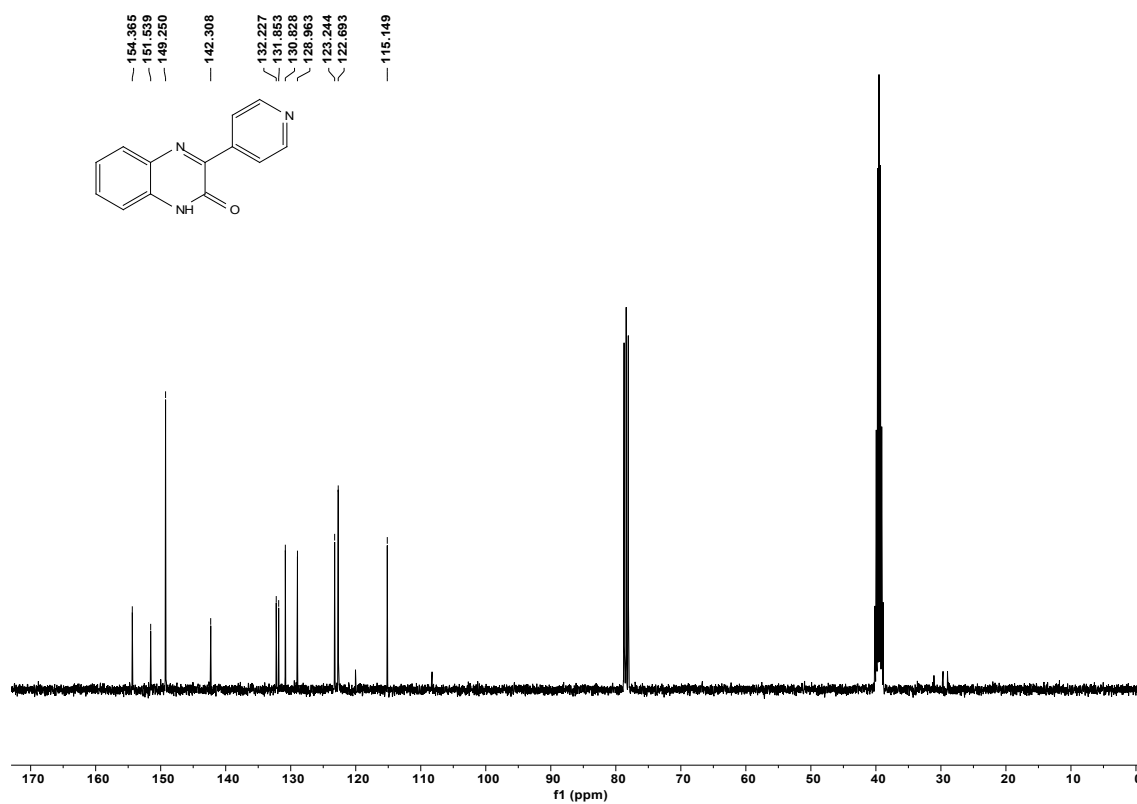

$^{13}\text{C}$  NMR Spectrum of 3-(Pyridin-4-yl)quinoxalin-2(1H)-one (Solvent:  $\text{DMSO-}d_6+\text{CDCl}_3$ )

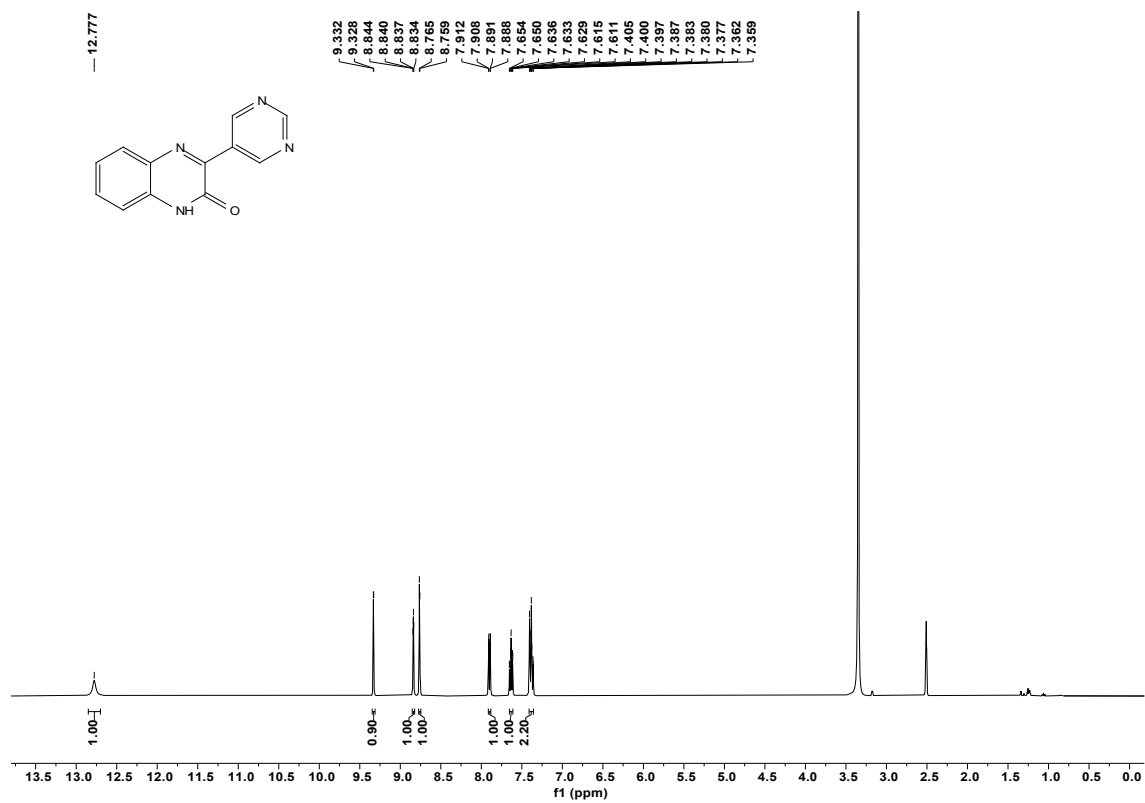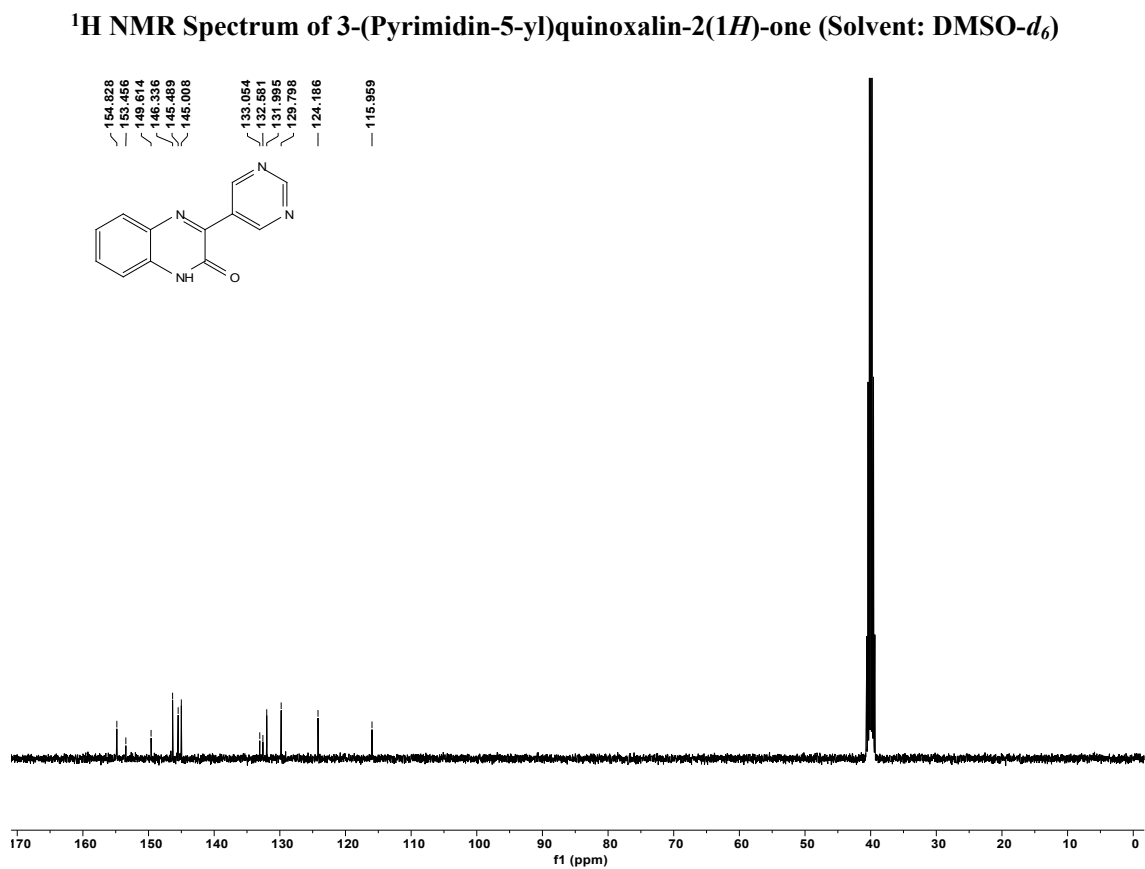

**<sup>13</sup>C NMR Spectrum of 3-(Pyrimidin-5-yl)quinoxalin-2(1H)-one (Solvent: DMSO-*d*<sub>6</sub>)**

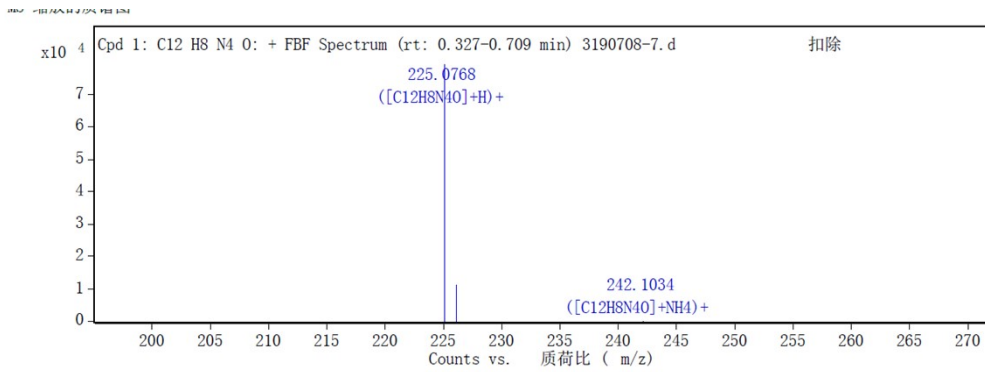

**ESI Spectrum of 3-(Pyrimidin-5-yl)quinoxalin-2(1H)-one**

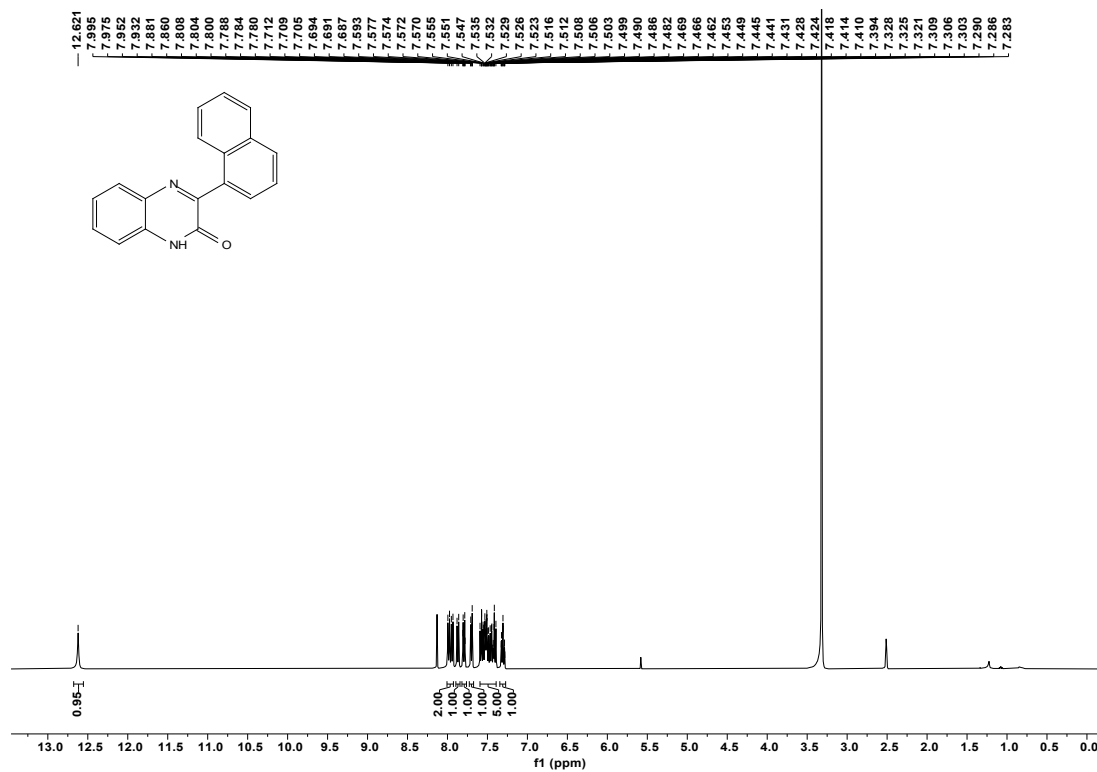

**<sup>1</sup>H NMR Spectrum of 3-(Naphthalen-3-yl)quinoxalin-2(1H)-one (Solvent: DMSO-*d*<sub>6</sub>+CDCl<sub>3</sub>)**

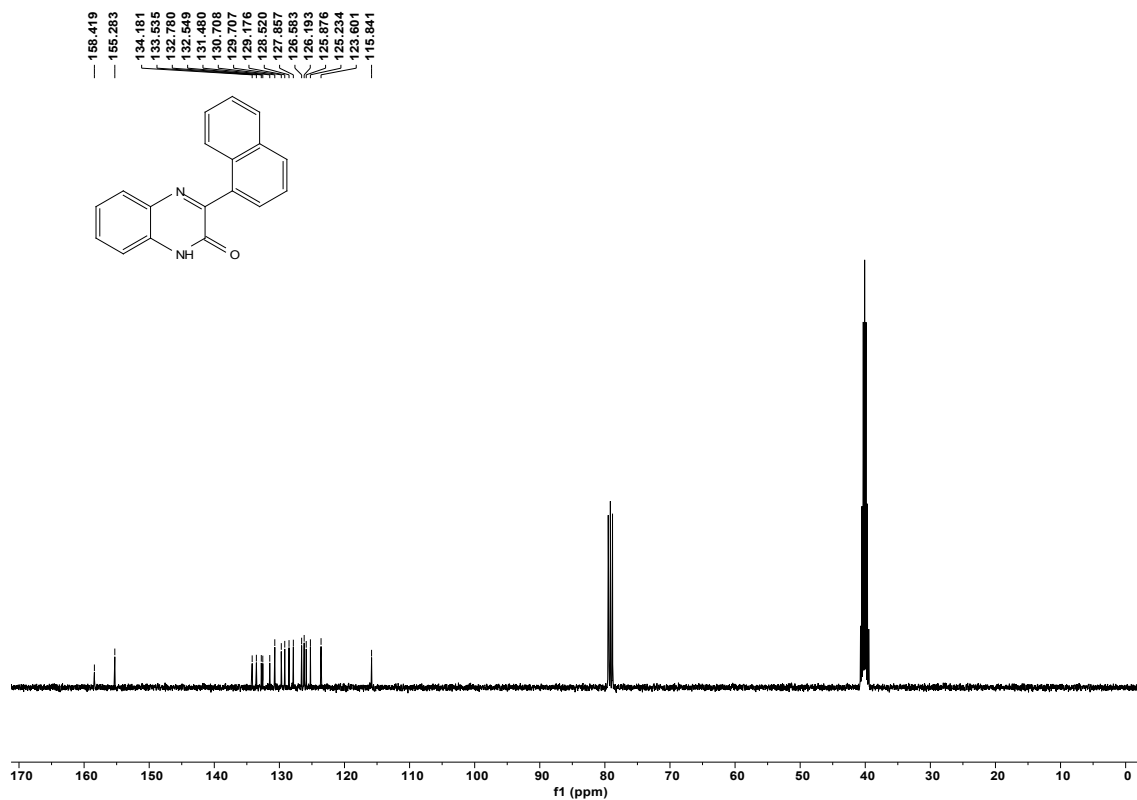

**<sup>13</sup>C NMR Spectrum of 3-(Naphthalen-3-yl)quinoxalin-2(1H)-one (Solvent: DMSO-*d*<sub>6</sub>+CDCl<sub>3</sub>)**

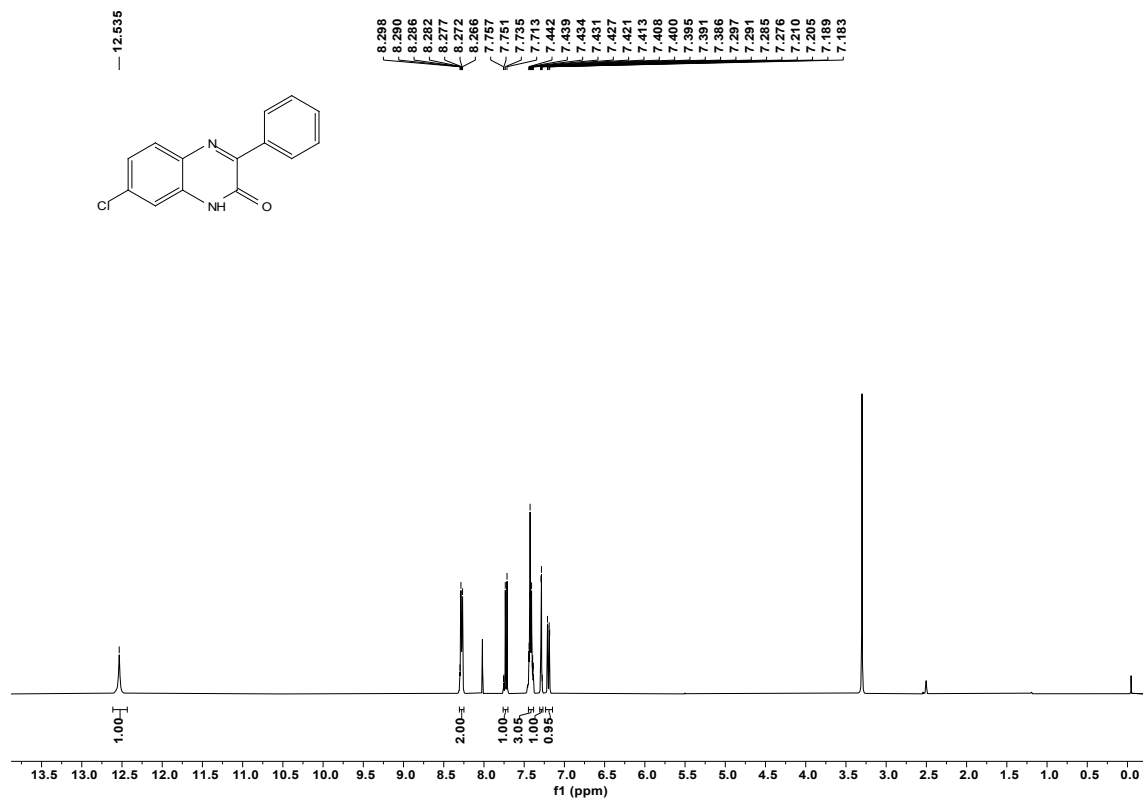

<sup>1</sup>H NMR Spectrum of 7-Chloro-3-phenylquinoxalin-2(1H)-one(Solvent: DMSO-*d*<sub>6</sub>+CDCl<sub>3</sub>)

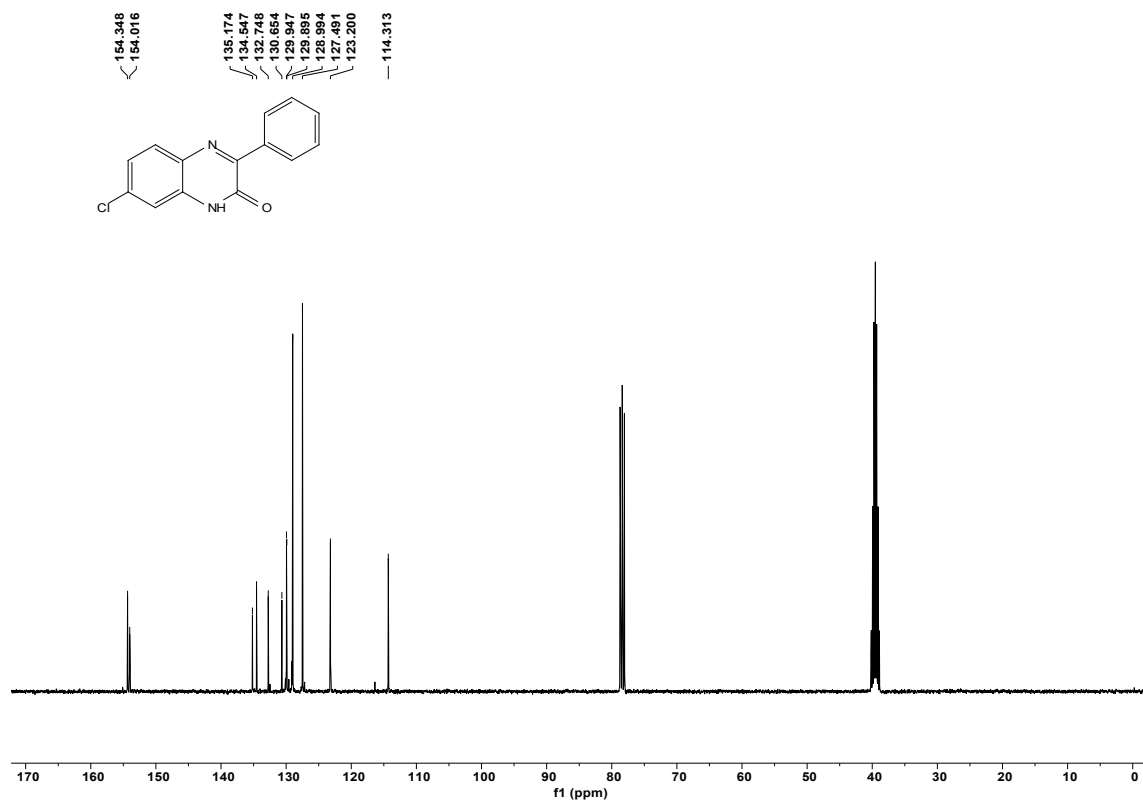

<sup>13</sup>C NMR Spectrum of 7-Chloro-3-phenylquinoxalin-2(1H)-one(Solvent: DMSO-*d*<sub>6</sub>+CDCl<sub>3</sub>)

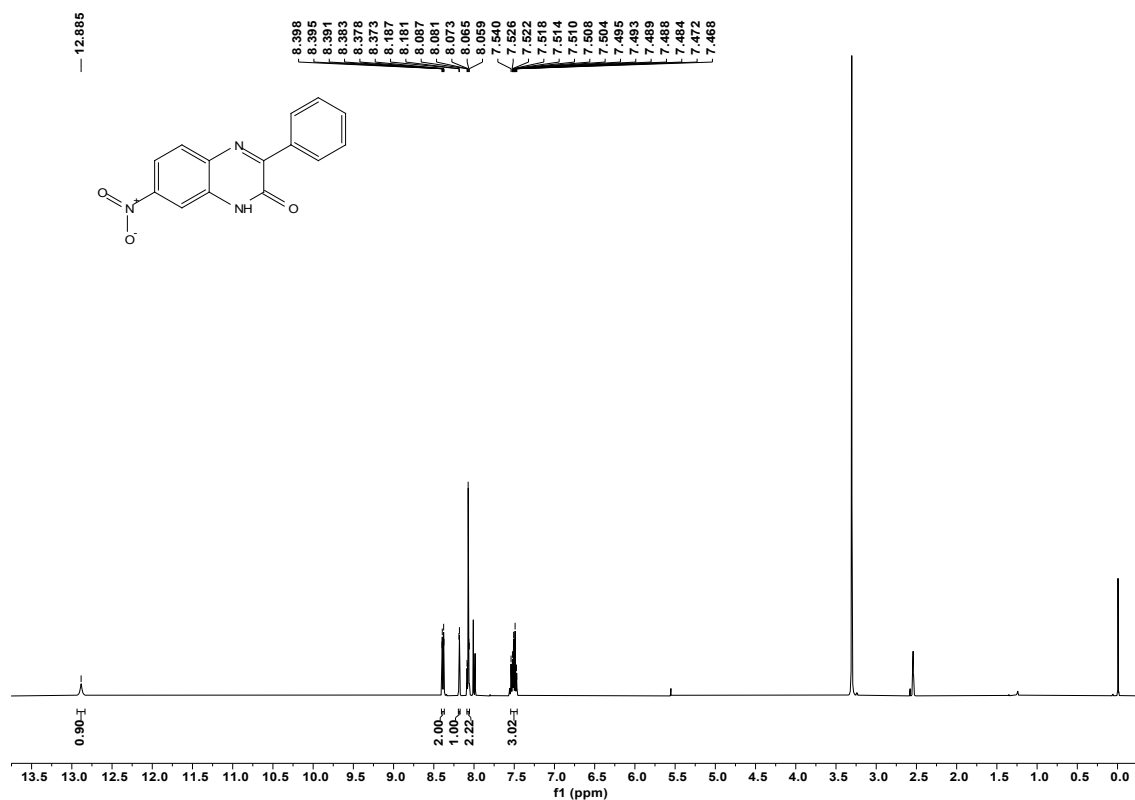

**<sup>1</sup>H NMR Spectrum of 7-Nitro-3-phenylquinoxalin-2(1H)-one (Solvent: DMSO-*d*<sub>6</sub>+CDCl<sub>3</sub>)**

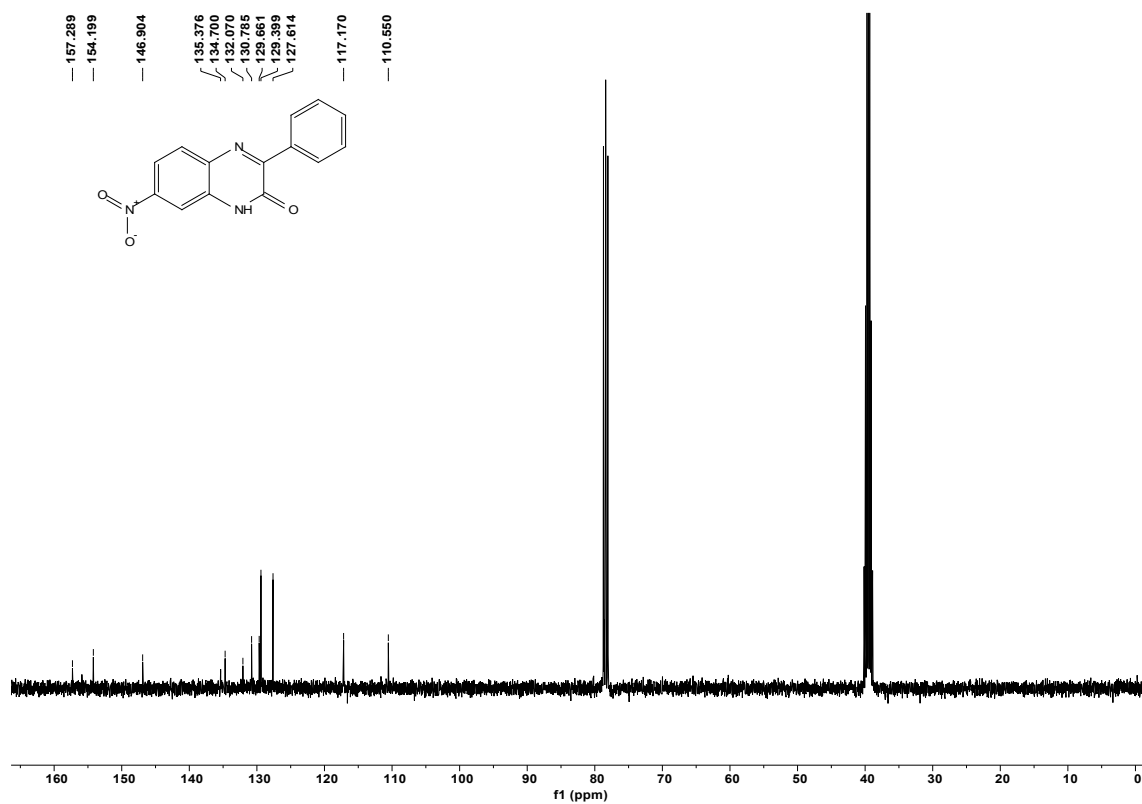

**<sup>13</sup>C NMR Spectrum of 7-Nitro-3-phenylquinoxalin-2(1H)-one (Solvent: DMSO-*d*<sub>6</sub>+CDCl<sub>3</sub>)**



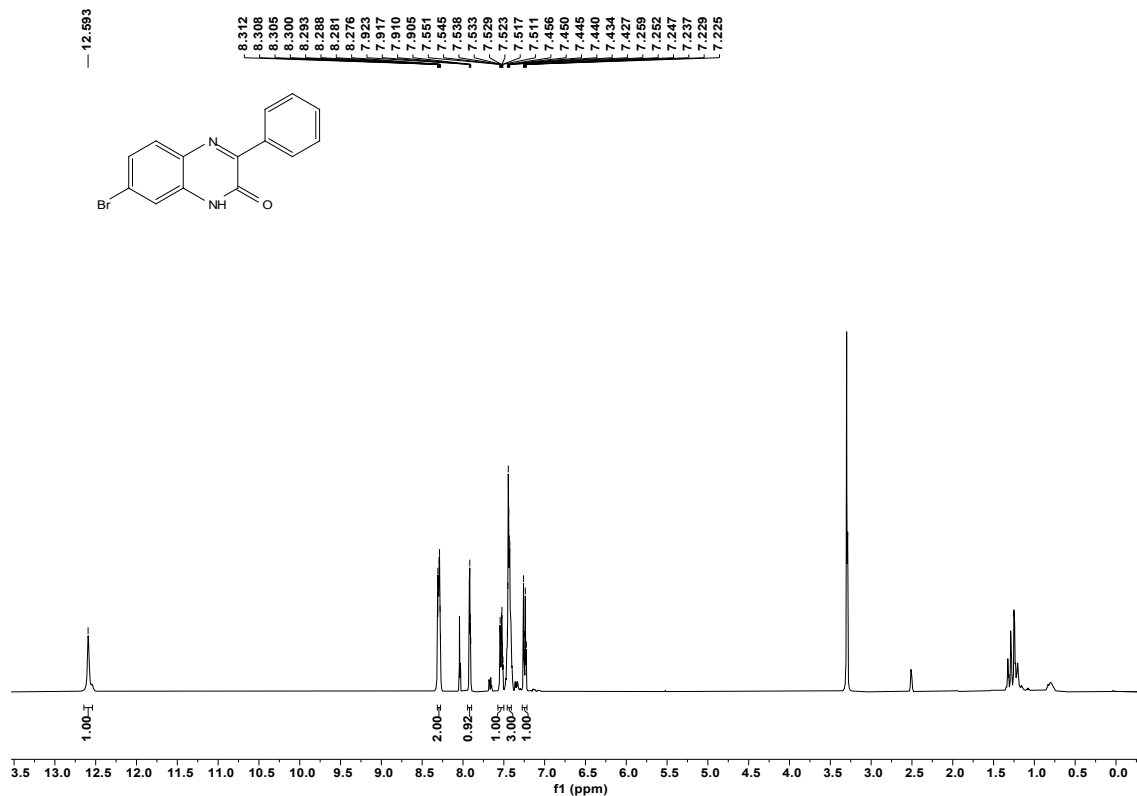

<sup>1</sup>H NMR Spectrum of 7-Bromo-3-phenylquinoxalin-2(1H)-one (Solvent: DMSO-*d*<sub>6</sub>+CDCl<sub>3</sub>)

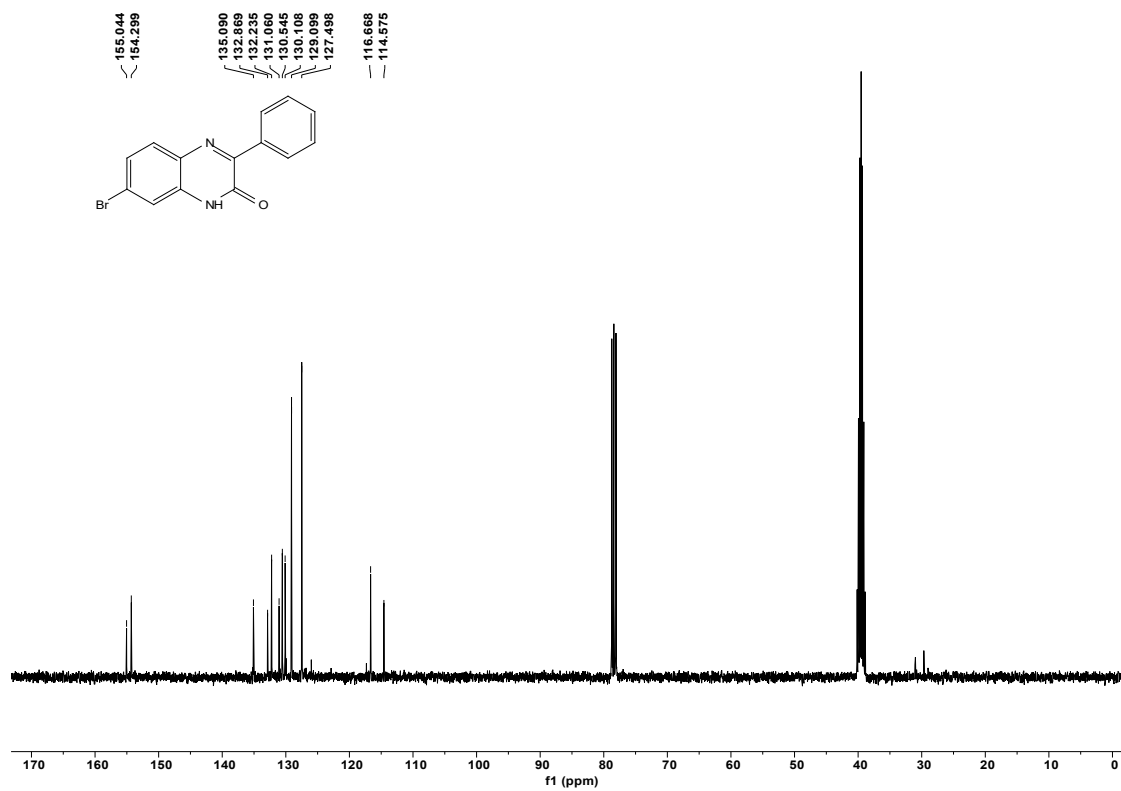

<sup>13</sup>C NMR Spectrum of 7-Bromo-3-phenylquinoxalin-2(1H)-one (Solvent: DMSO-*d*<sub>6</sub>+CDCl<sub>3</sub>)

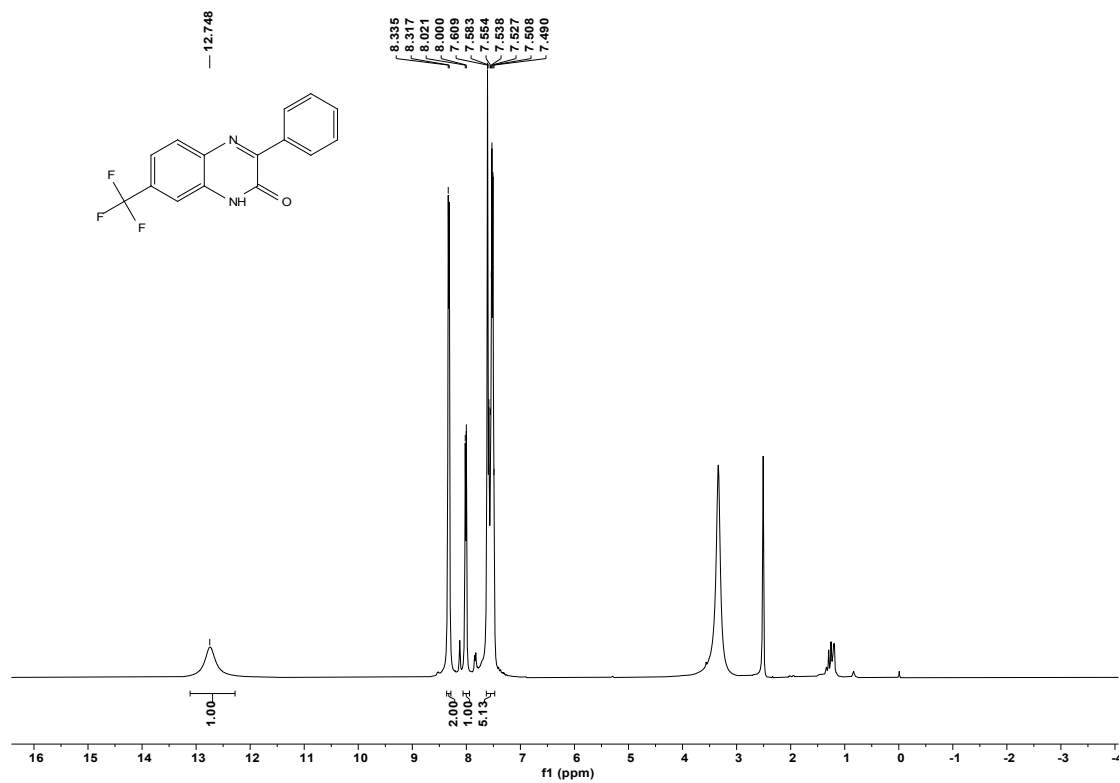

**<sup>1</sup>H NMR Spectrum of 3-Phenyl-7-(trifluoromethyl)quinoxalin-2(1H)-one (Solvent: DMSO-*d*<sub>6</sub>)**

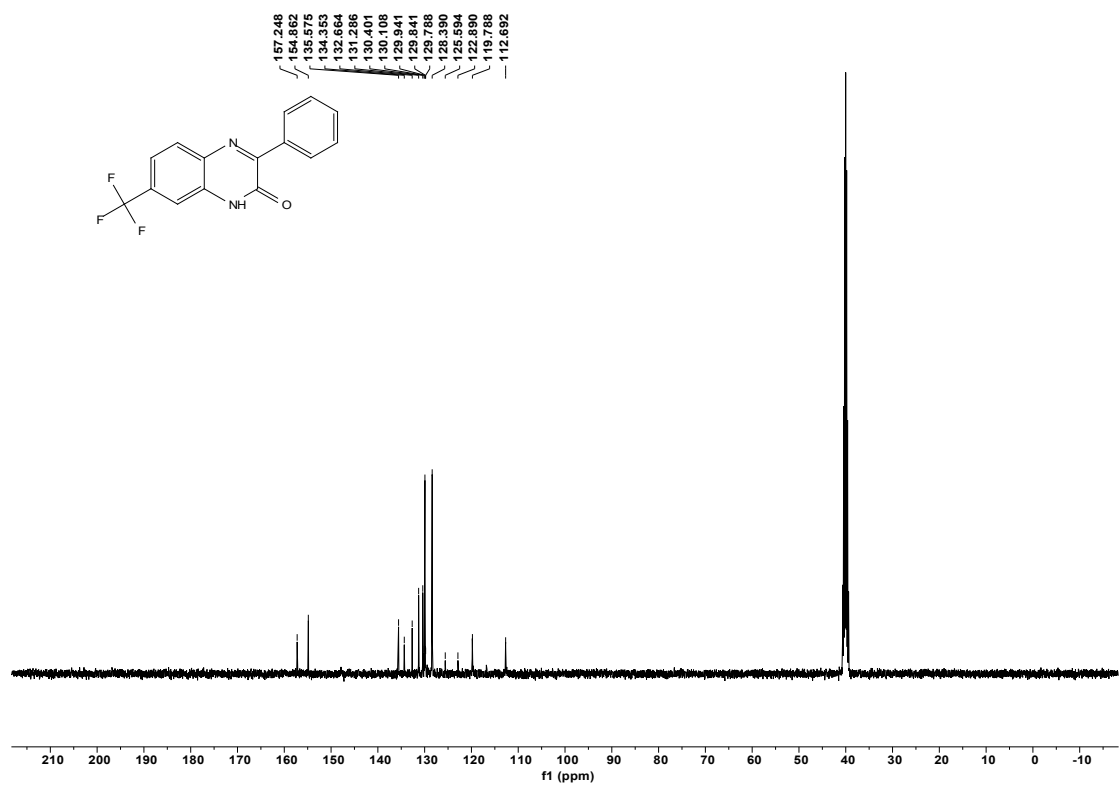

**<sup>13</sup>C NMR Spectrum of 3-Phenyl-7-(trifluoromethyl)quinoxalin-2(1H)-one (Solvent: DMSO-*d*<sub>6</sub>)**

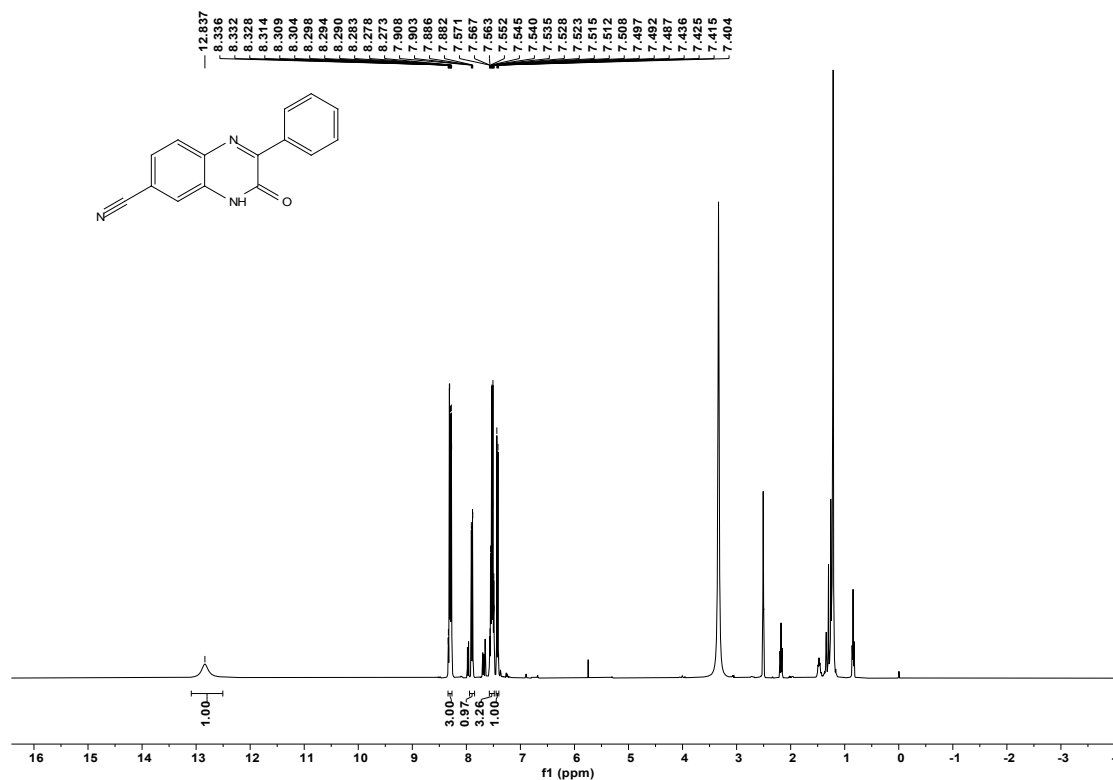

**<sup>1</sup>H NMR Spectrum of 3-Oxo-2-phenyl-3,4-dihydroquinoxaline-6-carbonitrile (Solvent: DMSO-*d*<sub>6</sub>)**

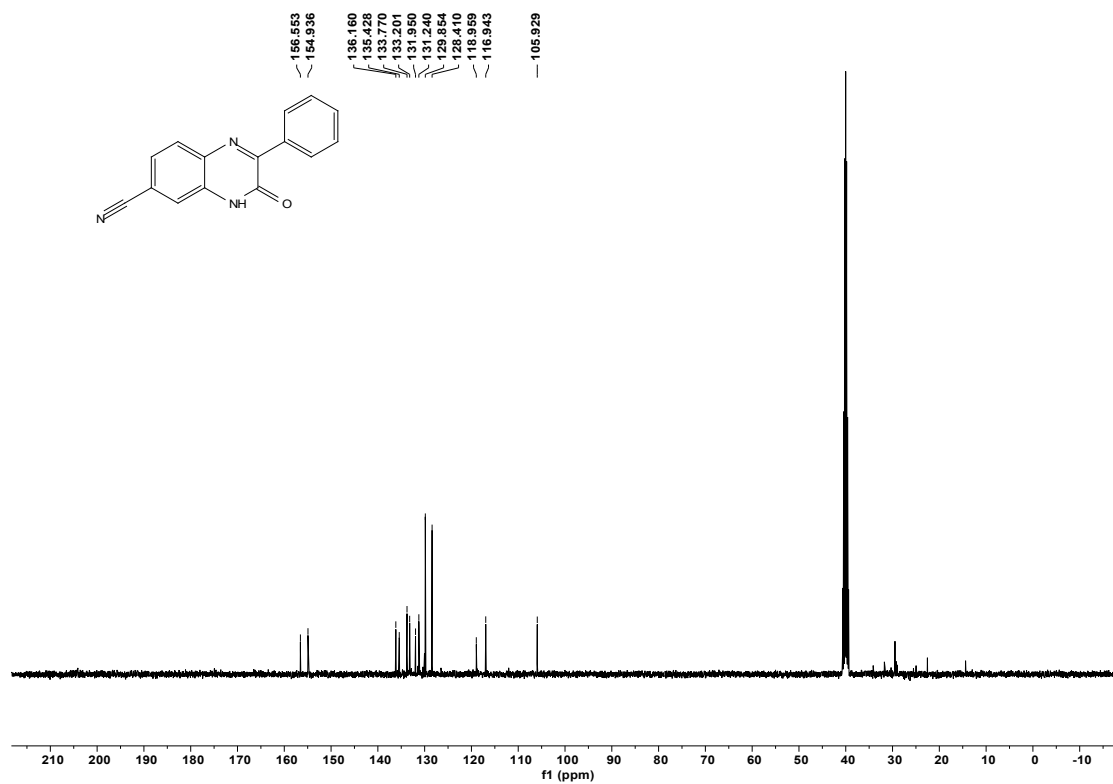

**<sup>13</sup>C NMR Spectrum of 3-Oxo-2-phenyl-3,4-dihydroquinoxaline-6-carbonitrile (Solvent: DMSO-*d*<sub>6</sub>)**

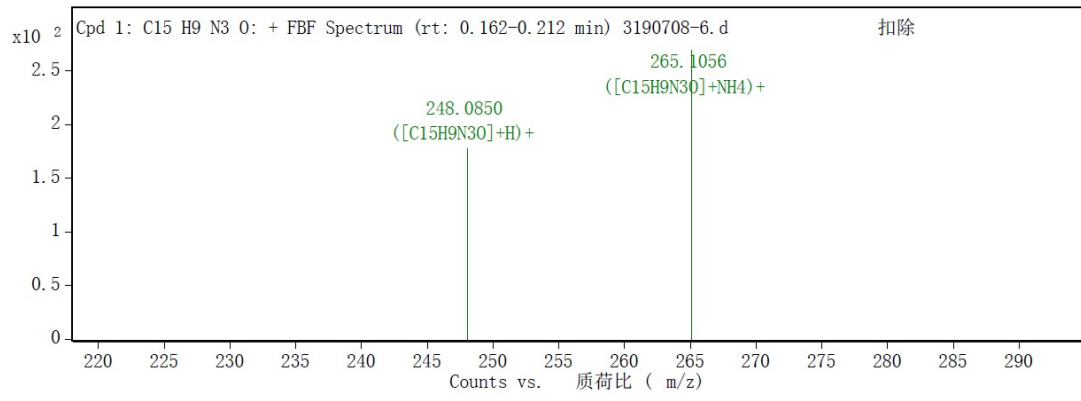

**ESI-MS Spectrum of 3-Oxo-2-phenyl-3,4-dihydroquinoxaline-6-carbonitrile**

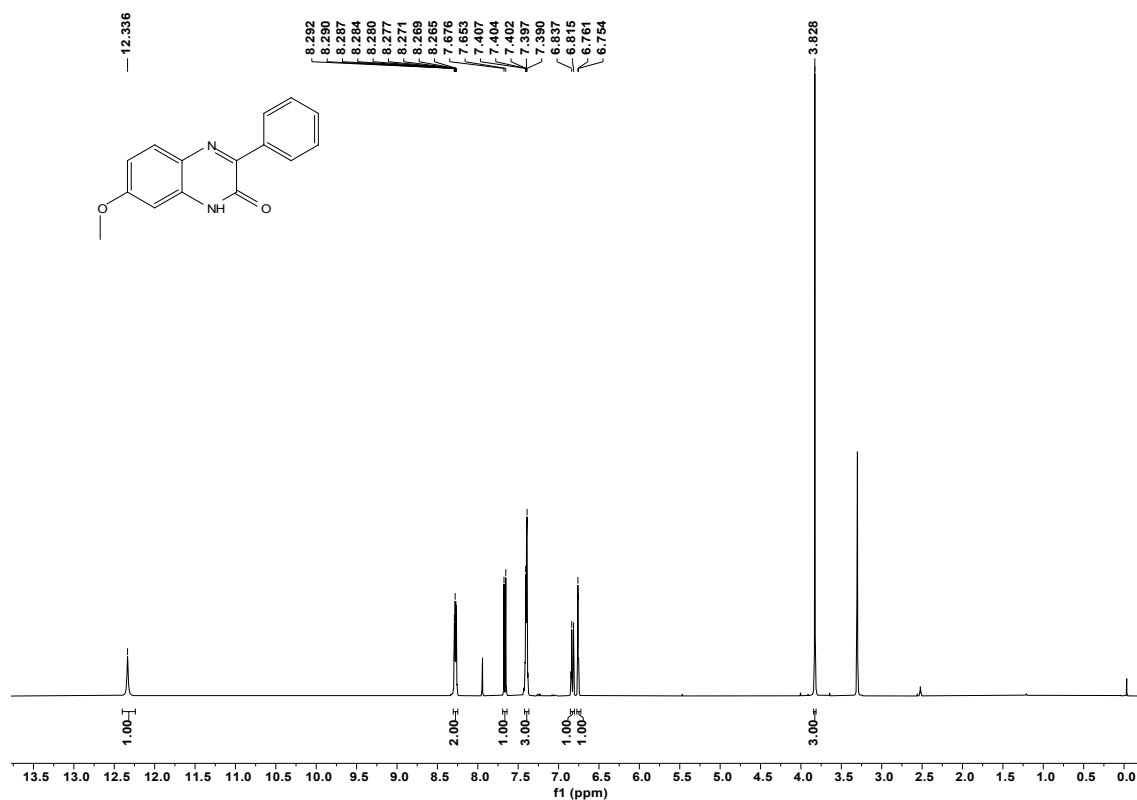

**<sup>1</sup>H NMR Spectrum of 7-Methoxy-3-phenylquinoxalin-2(1H)-one (Solvent: DMSO-*d*<sub>6</sub>+CDCl<sub>3</sub>)**

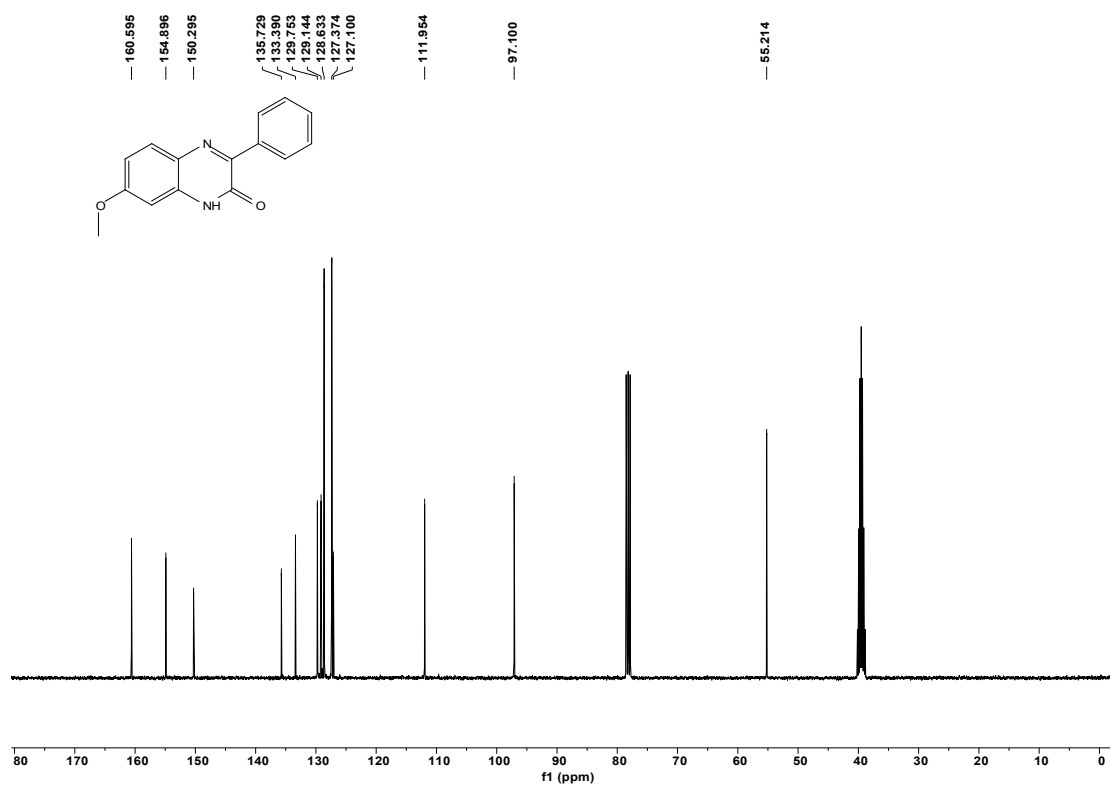

**<sup>13</sup>C NMR Spectrum of 7-Methoxy-3-phenylquinoxalin-2(1H)-one (Solvent: DMSO-*d*<sub>6</sub>+CDCl<sub>3</sub>)**

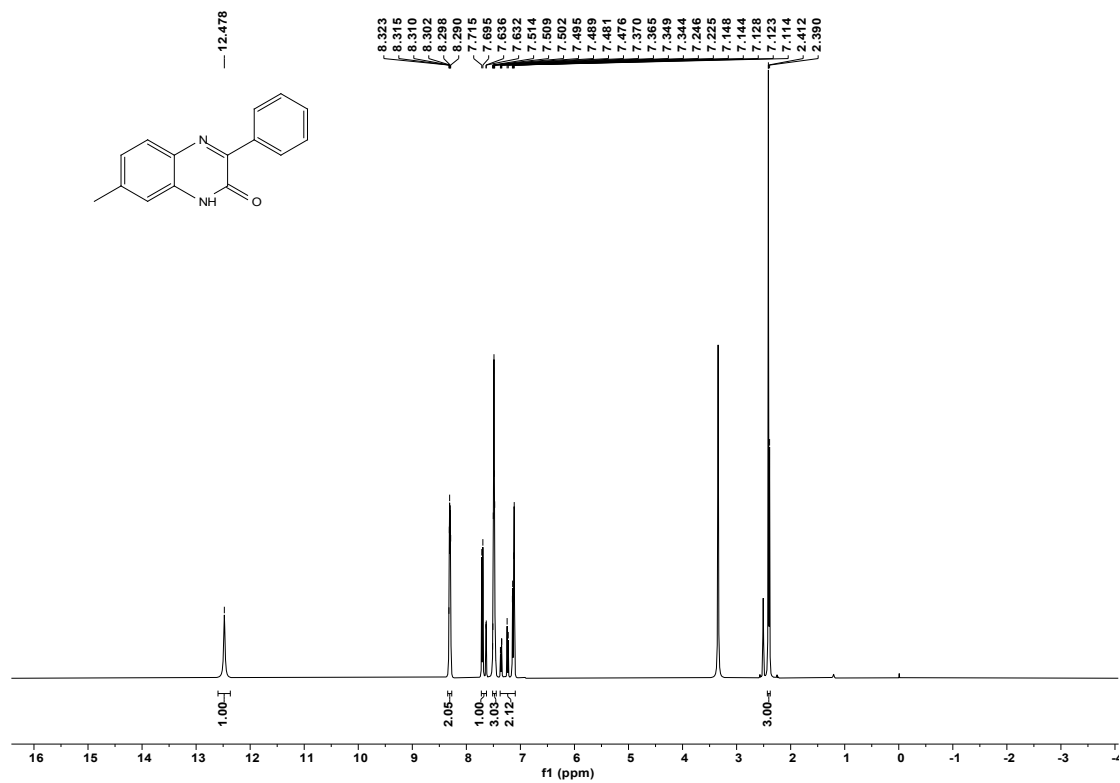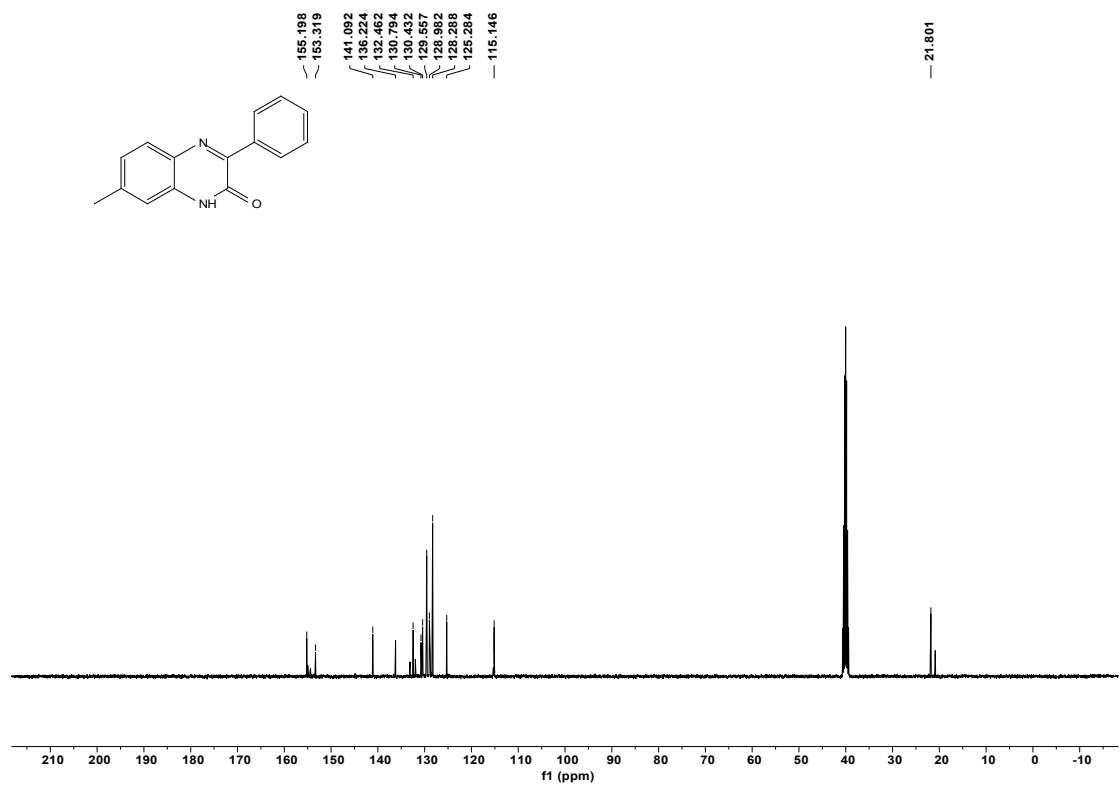

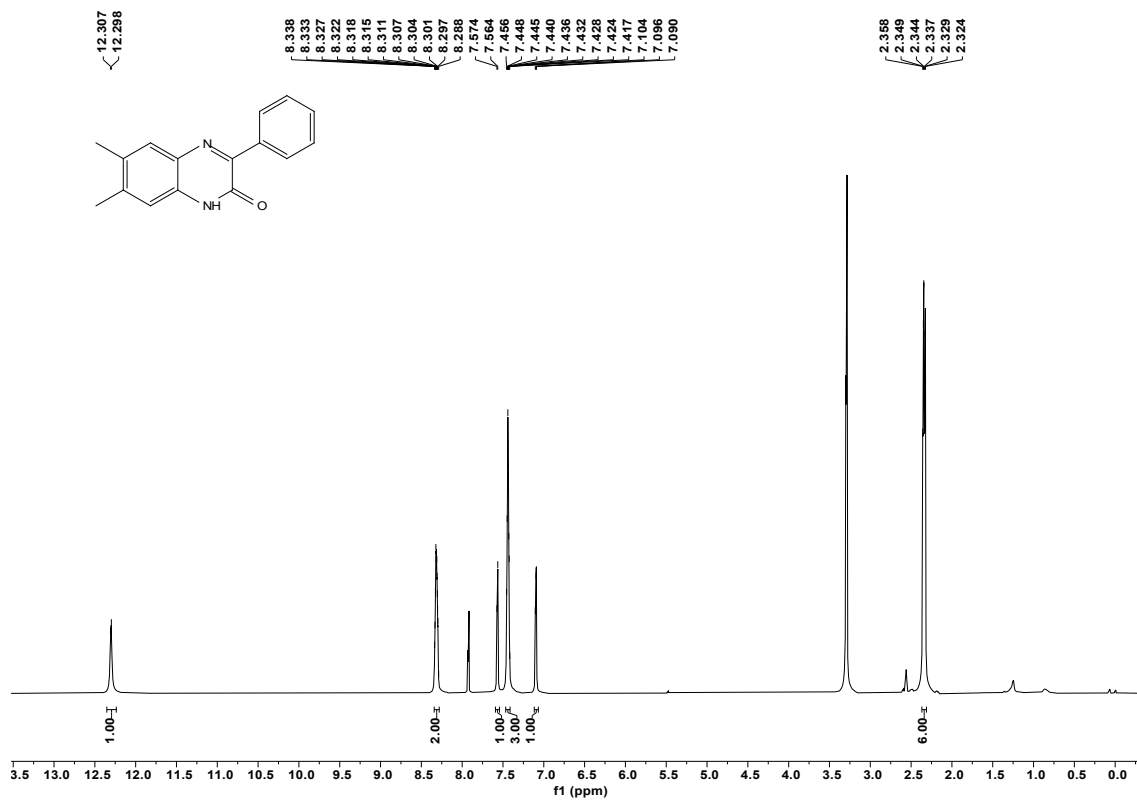

**<sup>1</sup>H NMR Spectrum of 6,7-Dimethyl-3-phenylquinoxalin-2(1H)-one (Solvent: DMSO-*d*<sub>6</sub>+CDCl<sub>3</sub>)**

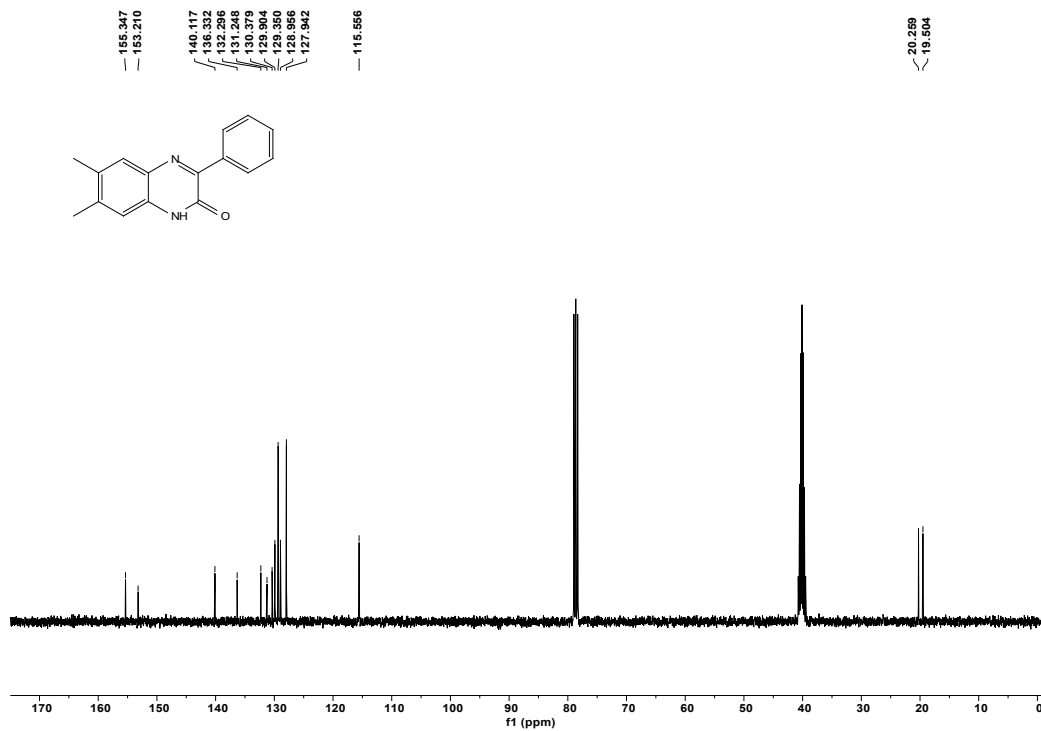

**<sup>13</sup>C NMR Spectrum of 6,7-Dimethyl-3-phenylquinoxalin-2(1H)-one (Solvent: DMSO-*d*<sub>6</sub>+CDCl<sub>3</sub>)**

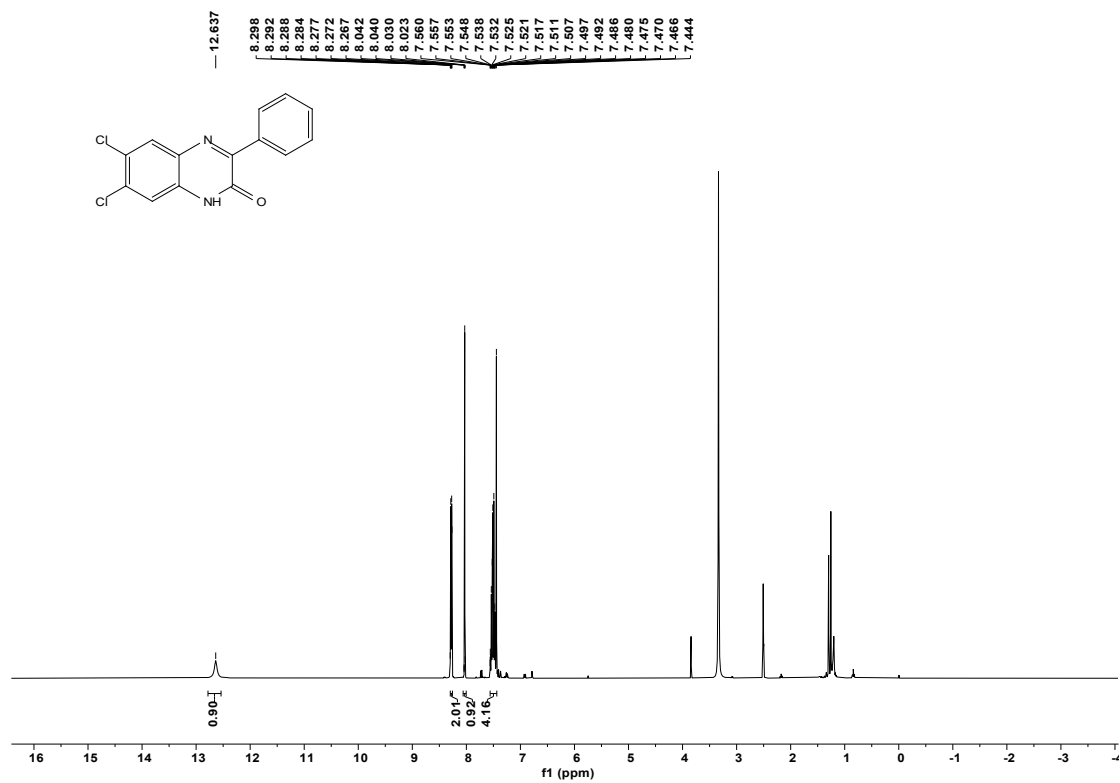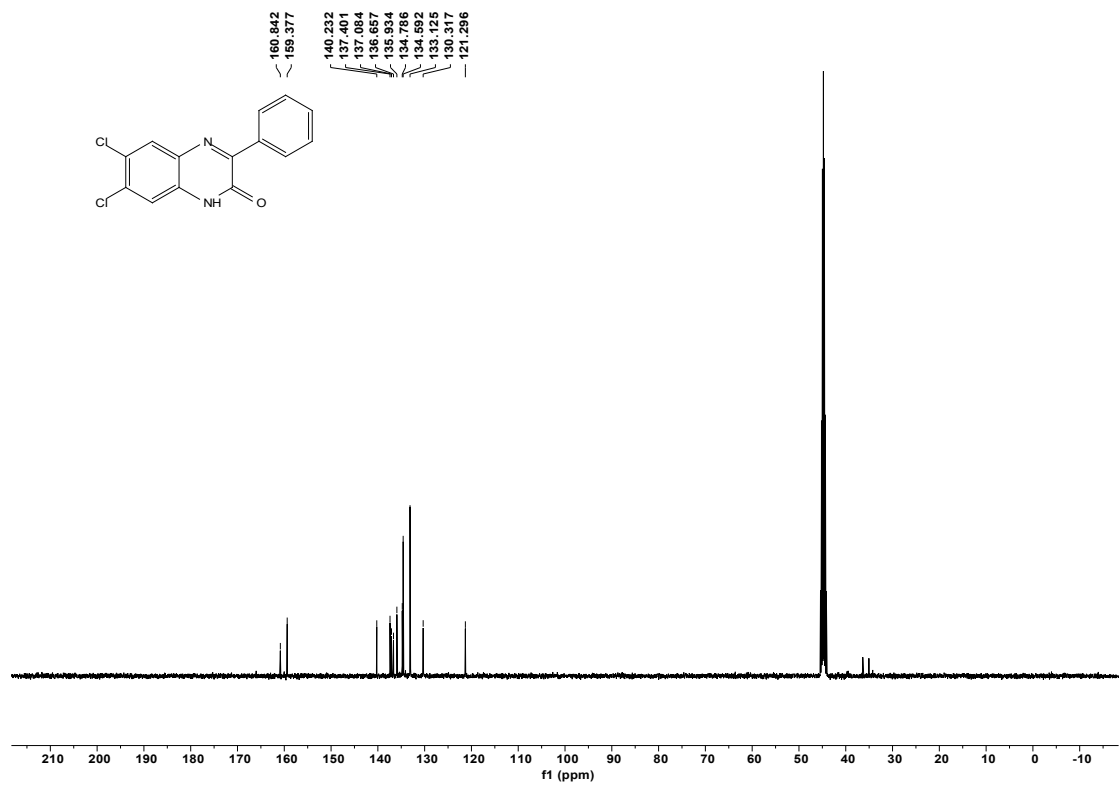



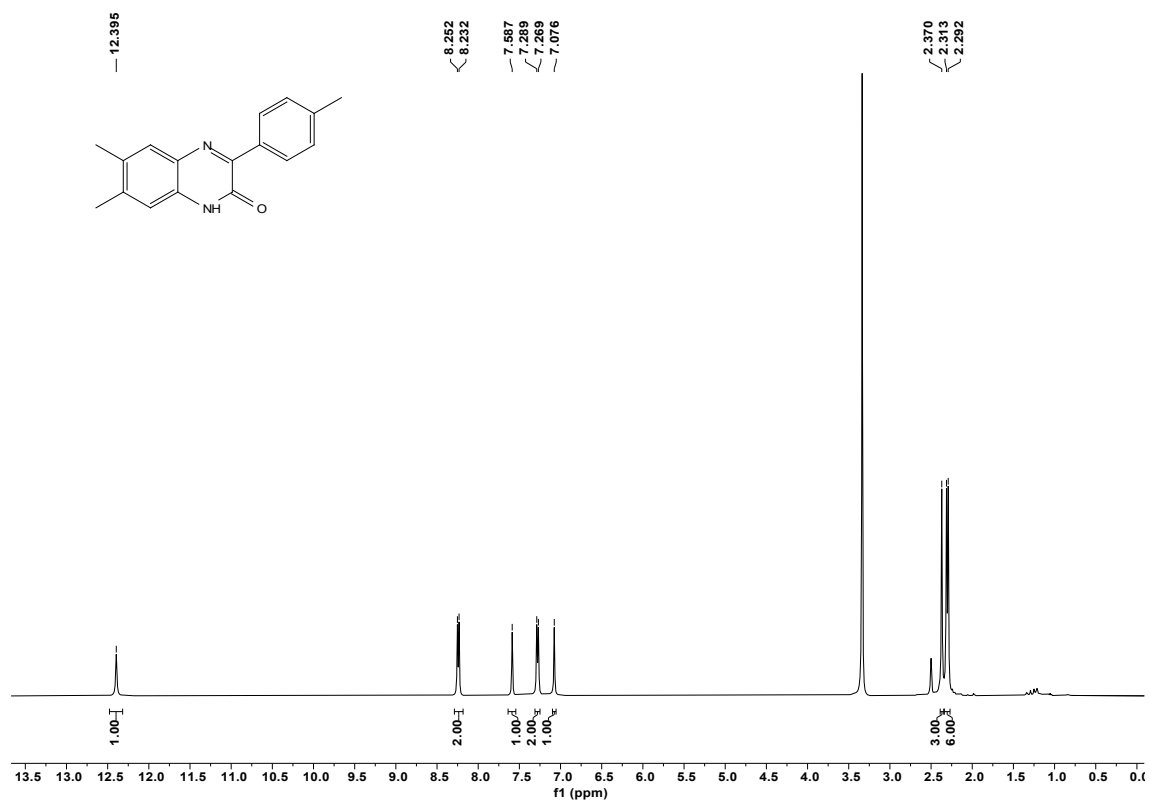

**<sup>1</sup>H NMR Spectrum of 6,7-Dimethyl-3-*p*-tolylquinoxalin-2(1H)-one (Solvent: DMSO-*d*<sub>6</sub>)**

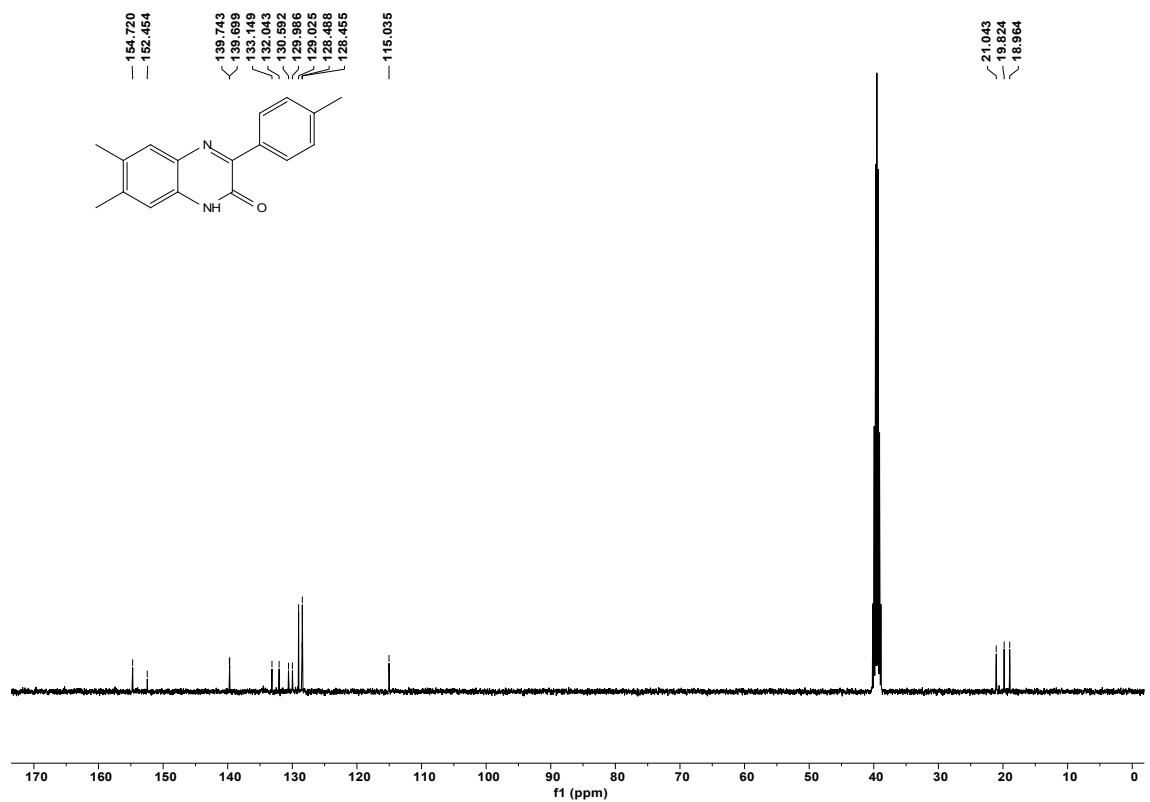

**<sup>13</sup>C NMR Spectrum of 6,7-Dimethyl-3-*p*-tolylquinoxalin-2(1H)-one (Solvent: DMSO-*d*<sub>6</sub>)**

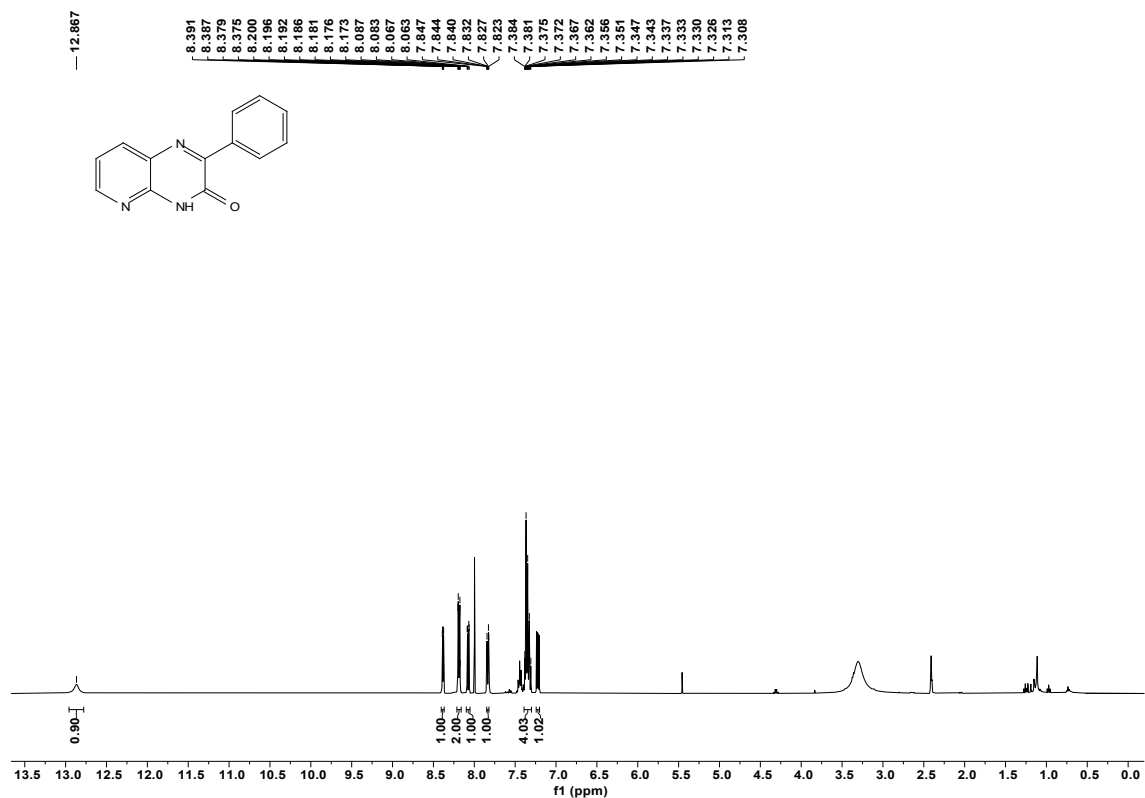

<sup>1</sup>H NMR Spectrum of 2-Phenylpyrido[3,2-b]pyrazin-3(4H)-one (Solvent: DMSO-*d*<sub>6</sub>+CDCl<sub>3</sub>)

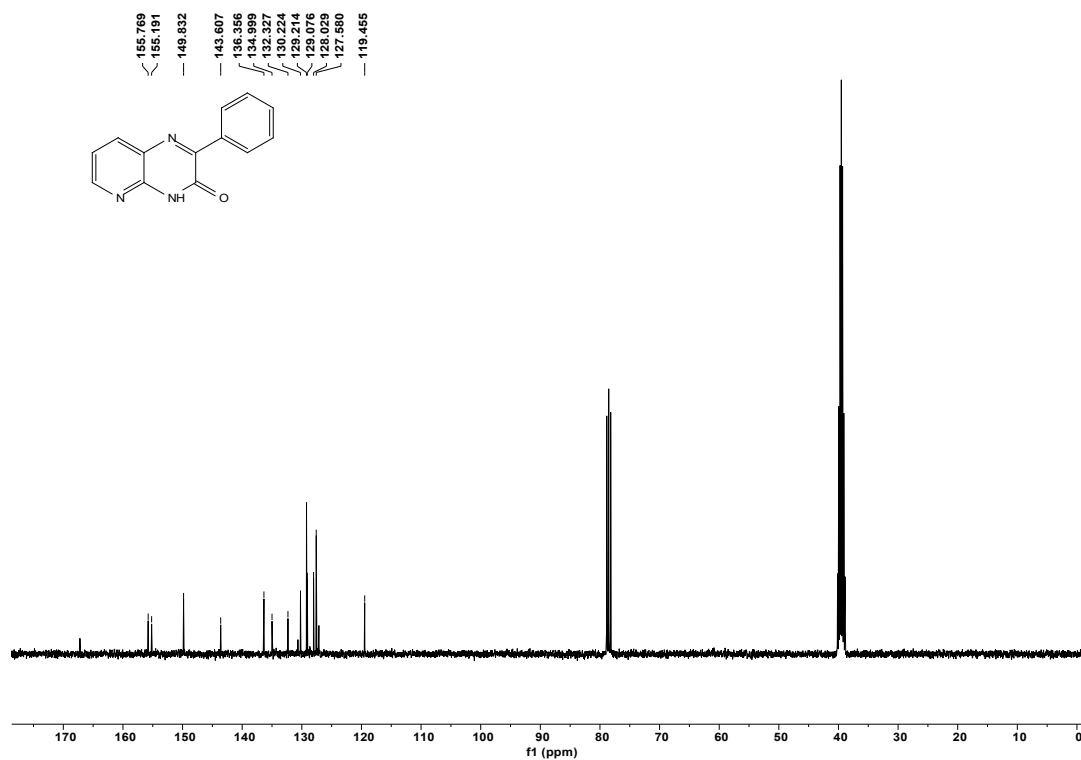

<sup>13</sup>C NMR Spectrum of 2-Phenylpyrido[3,2-b]pyrazin-3(4H)-one (Solvent: DMSO-*d*<sub>6</sub>+CDCl<sub>3</sub>)

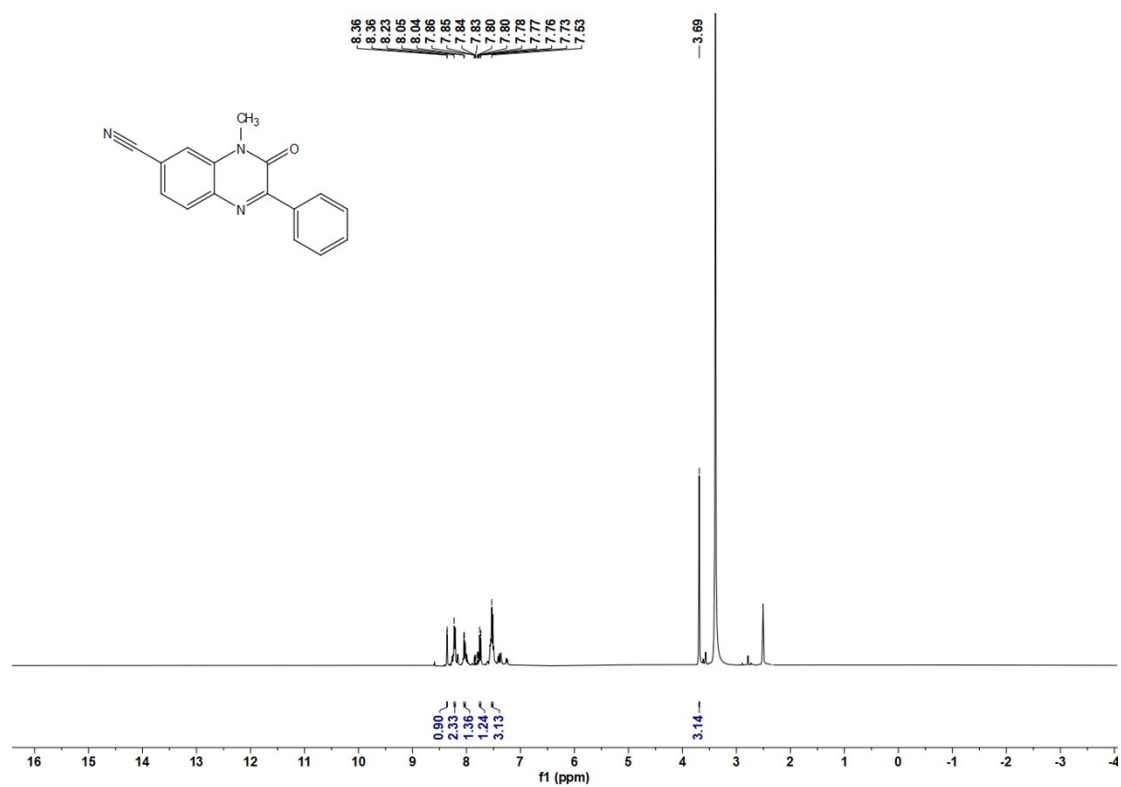

**<sup>1</sup>H NMR Spectrum of 4-methyl-3-oxo-2-phenyl-3,4-dihydroquinoxaline-6-carbonitrile (Solvent: DMSO-*d*<sub>6</sub>)**

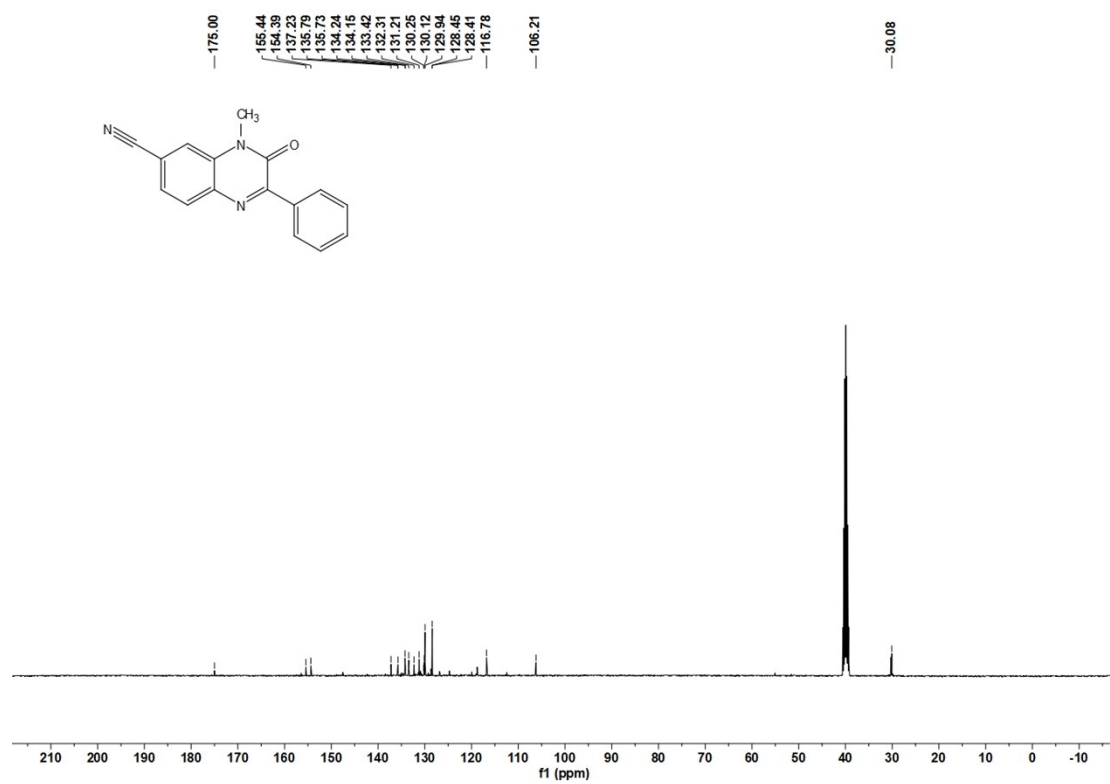

**<sup>13</sup>C NMR Spectrum of 4-methyl-3-oxo-2-phenyl-3,4-dihydroquinoxaline-6-carbonitrile (Solvent: DMSO-*d*<sub>6</sub>)**

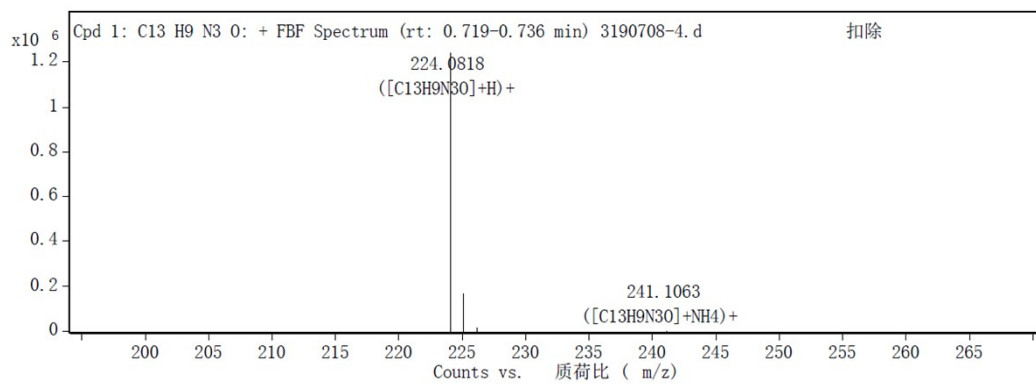

**ESI-MS Spectrum of 2-Phenylpyrido[3,2-b]pyrazin-3(4H)-one**

## 6. Optimized Structures and Cartesian Coordinates

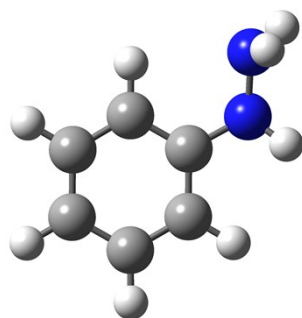

A

|   |             |             |             |
|---|-------------|-------------|-------------|
| C | -0.45018300 | -0.24612200 | 0.08316800  |
| C | 0.48592000  | -1.29121800 | 0.00260200  |
| C | 1.84900500  | -1.01365200 | -0.06178600 |
| C | 2.30668300  | 0.30597300  | -0.05546600 |
| C | 1.37463000  | 1.34305200  | 0.01856700  |
| C | 0.00711500  | 1.08022900  | 0.08700600  |
| H | 0.13960100  | -2.32353400 | -0.00320500 |
| H | 2.55650500  | -1.83696300 | -0.12331700 |
| H | 3.36999200  | 0.52100700  | -0.10994500 |
| H | 1.71319900  | 2.37648700  | 0.02182700  |
| H | -0.71773600 | 1.88376400  | 0.14229100  |
| N | -1.81355100 | -0.56420600 | 0.21257400  |
| H | -2.03082800 | -1.49568000 | -0.13441500 |
| N | -2.74071200 | 0.43832400  | -0.14825300 |
| H | -3.02549200 | 0.35065200  | -1.12583800 |
| H | -3.56442600 | 0.33586900  | 0.43781200  |

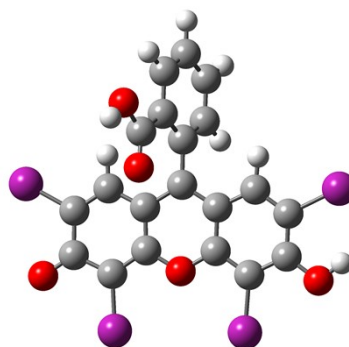

EY\*

|   |             |             |             |
|---|-------------|-------------|-------------|
| C | -0.02619300 | 1.17292200  | -0.24840600 |
| C | -1.06802300 | -1.06128500 | -0.09549300 |
| C | -1.22597500 | 0.33351300  | -0.21403200 |
| C | -2.53737000 | 0.85118300  | -0.32436600 |

|    |             |             |             |
|----|-------------|-------------|-------------|
| H  | -2.67206200 | 1.92002500  | -0.43447500 |
| C  | -3.64076800 | 0.02925500  | -0.29650600 |
| C  | -3.53396000 | -1.41449400 | -0.15910900 |
| C  | -2.16414700 | -1.91947400 | -0.06360500 |
| C  | -0.13289600 | 2.64508000  | -0.41377800 |
| C  | -0.58641100 | 3.52341800  | 0.60334700  |
| C  | 0.22092000  | 3.19972100  | -1.65484800 |
| C  | -0.69146400 | 4.89904000  | 0.34471000  |
| C  | 0.11851900  | 4.56856700  | -1.89882100 |
| H  | 0.56533300  | 2.53529600  | -2.44206600 |
| C  | -0.34533800 | 5.42223100  | -0.89747400 |
| H  | -1.04057300 | 5.55456800  | 1.13379700  |
| H  | 0.39241000  | 4.96376100  | -2.87313500 |
| H  | -0.43429900 | 6.48890800  | -1.08071700 |
| C  | -0.90615300 | 3.00128800  | 1.96159200  |
| O  | -0.81318800 | 1.84266800  | 2.31599300  |
| O  | -1.31981600 | 3.97326900  | 2.81454800  |
| H  | -1.49526200 | 3.52160300  | 3.66088500  |
| Br | -5.37678600 | 0.76277600  | -0.44229300 |
| O  | -4.52174200 | -2.17886800 | -0.12895800 |
| O  | 0.16516300  | -1.64355700 | -0.01562700 |
| Br | -1.91665600 | -3.76740800 | 0.09803800  |
| C  | 3.72264000  | -0.88054900 | -0.04578300 |
| C  | 3.66770700  | 0.52557700  | -0.14799000 |
| C  | 2.47795900  | 1.21827300  | -0.21559900 |
| C  | 1.23418400  | 0.53024900  | -0.19352800 |
| C  | 1.29659500  | -0.89165200 | -0.07463900 |
| C  | 2.50298600  | -1.57892200 | -0.00655000 |
| H  | 2.48792600  | 2.29837900  | -0.28164100 |
| Br | 5.32948500  | 1.47815900  | -0.18336700 |
| Br | 2.51306800  | -3.46516600 | 0.14284700  |
| O  | 4.87249700  | -1.57742000 | 0.01931200  |
| H  | 5.61745200  | -0.94753800 | -0.01242700 |

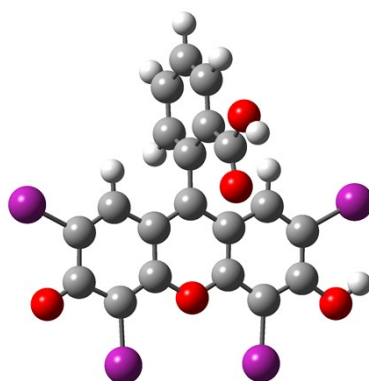

|    | EY          |             |             |
|----|-------------|-------------|-------------|
| C  | -0.06987900 | 1.13250500  | -0.25508000 |
| C  | -1.21967900 | -1.01824900 | -0.08523100 |
| C  | -1.25288100 | 0.42573400  | -0.20792000 |
| C  | -2.55318800 | 1.04776200  | -0.25579200 |
| H  | -2.60827300 | 2.12618800  | -0.34039400 |
| C  | -3.68491800 | 0.31025500  | -0.19717300 |
| C  | -3.69333000 | -1.17305100 | -0.07971300 |
| C  | -2.35399200 | -1.77223400 | -0.02697300 |
| C  | -0.06296200 | 2.61709500  | -0.44533300 |
| C  | 0.05465800  | 3.54312600  | 0.61642100  |
| C  | -0.17853900 | 3.10463100  | -1.75366400 |
| C  | 0.05002100  | 4.91896400  | 0.34153100  |
| C  | -0.17776000 | 4.47506400  | -2.01550800 |
| H  | -0.27348100 | 2.39683200  | -2.57187800 |
| C  | -0.06260900 | 5.38536500  | -0.96528800 |
| H  | 0.13355100  | 5.61740400  | 1.16579800  |
| H  | -0.27061900 | 4.82667600  | -3.03905000 |
| H  | -0.06400100 | 6.45343600  | -1.16105200 |
| C  | 0.17474400  | 3.06122700  | 2.02236500  |
| O  | 0.25532700  | 1.89791700  | 2.36087200  |
| O  | 0.19070100  | 4.07368000  | 2.92371300  |
| H  | 0.27000200  | 3.64916200  | 3.79827300  |
| Br | -5.38433500 | 1.14692700  | -0.26355100 |
| O  | -4.72924400 | -1.82456500 | -0.03243300 |
| O  | -0.01652500 | -1.66205200 | -0.02758300 |
| Br | -2.25753200 | -3.65314500 | 0.12684000  |
| C  | 3.57142000  | -1.11531900 | -0.11606300 |
| C  | 3.59846700  | 0.29106300  | -0.24088700 |
| C  | 2.44287500  | 1.04295000  | -0.29081700 |
| C  | 1.18495000  | 0.41749100  | -0.21640600 |
| C  | 1.15302800  | -0.98804100 | -0.09552200 |
| C  | 2.32385300  | -1.74885000 | -0.04540200 |
| H  | 2.50494400  | 2.11970900  | -0.38702100 |
| Br | 5.30822300  | 1.14664400  | -0.34241400 |
| Br | 2.22870800  | -3.62819000 | 0.11533700  |
| O  | 4.68159900  | -1.86985100 | -0.06617700 |
| H  | 5.46008900  | -1.28361400 | -0.12451800 |

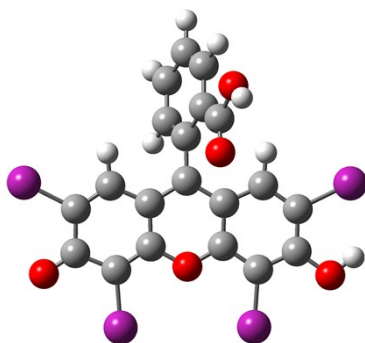

EY<sup>-</sup>

|    |             |             |             |
|----|-------------|-------------|-------------|
| C  | -0.03358300 | 1.17754300  | -0.16664100 |
| C  | -1.37323600 | -0.89796600 | -0.04498800 |
| C  | -1.30300000 | 0.52711300  | -0.11208900 |
| C  | -2.55442700 | 1.20449600  | -0.06675100 |
| H  | -2.56434900 | 2.28749400  | -0.05841500 |
| C  | -3.74328500 | 0.52457400  | -0.02073400 |
| C  | -3.87193200 | -0.92889100 | 0.00479900  |
| C  | -2.56593200 | -1.58163000 | 0.00295300  |
| C  | 0.04874900  | 2.62797000  | -0.41982700 |
| C  | 0.73226200  | 3.58536000  | 0.39266000  |
| C  | -0.57321200 | 3.11474000  | -1.59290800 |
| C  | 0.82013900  | 4.92989900  | -0.03030500 |
| C  | -0.48636300 | 4.44158000  | -1.98807300 |
| H  | -1.10323400 | 2.40255100  | -2.21750800 |
| C  | 0.22903100  | 5.36080500  | -1.20628800 |
| H  | 1.35370100  | 5.63413100  | 0.59734000  |
| H  | -0.95784900 | 4.75881500  | -2.91516400 |
| H  | 0.31479400  | 6.40005300  | -1.51277900 |
| C  | 1.25671000  | 3.23089600  | 1.72841300  |
| O  | 1.21865900  | 2.14207500  | 2.27011600  |
| O  | 1.81824400  | 4.30120700  | 2.38668500  |
| H  | 2.09554700  | 3.92510900  | 3.24138300  |
| Br | -5.38555900 | 1.51925400  | 0.03339900  |
| O  | -4.95449400 | -1.53629800 | 0.03720400  |
| O  | -0.21791500 | -1.64917300 | -0.02314700 |
| Br | -2.56485600 | -3.48797900 | 0.07542400  |
| C  | 3.41172500  | -1.41892200 | -0.13075100 |
| C  | 3.55180000  | -0.02963200 | -0.22503500 |
| C  | 2.47134300  | 0.83653400  | -0.22777300 |
| C  | 1.15068800  | 0.35216500  | -0.13061300 |
| C  | 1.00178600  | -1.05797800 | -0.06229300 |
| C  | 2.10241700  | -1.91707100 | -0.05629800 |
| H  | 2.64787100  | 1.90012700  | -0.31729800 |
| Br | 5.34181400  | 0.68359000  | -0.35092100 |



|    |            |             |             |
|----|------------|-------------|-------------|
| Br | 1.82912800 | -3.79551700 | 0.04297800  |
| O  | 4.45944000 | -2.28556000 | -0.11560600 |
| H  | 5.27350100 | -1.75294800 | -0.17512000 |

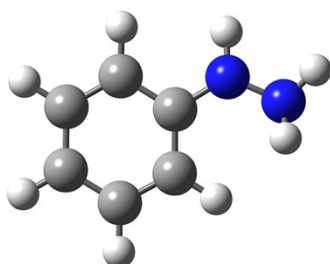

| B |             |             |             |
|---|-------------|-------------|-------------|
| C | 1.83445700  | 1.04107000  | -0.02746100 |
| C | 0.47706700  | 1.30827200  | -0.00072800 |
| C | -0.44158200 | 0.22775600  | 0.02513300  |
| C | 0.01314300  | -1.11260000 | 0.04147500  |
| C | 1.37630500  | -1.35321100 | 0.01449000  |
| C | 2.29053800  | -0.28615700 | -0.02487300 |
| H | 2.54346400  | 1.86183000  | -0.05086300 |
| H | 0.11365400  | 2.33267400  | -0.01239700 |
| H | -0.68227300 | -1.94145900 | 0.11928900  |
| H | 1.73855100  | -2.37568000 | 0.03894900  |
| H | 3.35611500  | -0.49099200 | -0.04305000 |
| N | -1.77755000 | 0.54055100  | 0.01396100  |
| H | -2.05447000 | 1.50319600  | 0.18889800  |
| N | -2.79261400 | -0.36107400 | 0.02802600  |
| H | -3.69828100 | 0.07027400  | -0.13331300 |
| H | -2.62518800 | -1.16696700 | -0.56963500 |

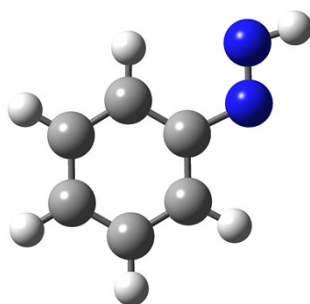

| C |             |             |            |
|---|-------------|-------------|------------|
| C | 1.30524300  | 1.32921700  | 0.00000000 |
| C | -0.06649500 | 1.10305300  | 0.00000000 |
| C | -0.54741800 | -0.21519100 | 0.00000000 |
| C | 0.34497000  | -1.29193500 | 0.00000000 |
| C | 1.72054900  | -1.05896500 | 0.00000000 |
| C | 2.20051500  | 0.25128300  | 0.00000000 |

|   |             |             |            |
|---|-------------|-------------|------------|
| H | 1.68473700  | 2.34764900  | 0.00000000 |
| H | -0.77811200 | 1.92160400  | 0.00000000 |
| H | -0.06159800 | -2.29872300 | 0.00000000 |
| H | 2.41386800  | -1.89540600 | 0.00000000 |
| H | 3.27127800  | 0.43735300  | 0.00000000 |
| N | -1.93330400 | -0.57265200 | 0.00000000 |
| N | -2.72373400 | 0.39996100  | 0.00000000 |
| H | -3.67508700 | -0.00841300 | 0.00000000 |

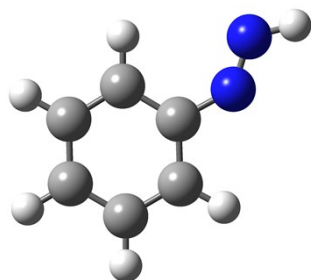

D

|   |             |             |             |
|---|-------------|-------------|-------------|
| C | 1.35840600  | 1.32255300  | 0.00000000  |
| C | -0.01332000 | 1.15807800  | 0.00000000  |
| C | -0.52144600 | -0.16773400 | 0.00000000  |
| C | 0.32121500  | -1.30283400 | 0.00000000  |
| C | 1.69327800  | -1.10440200 | 0.00000000  |
| C | 2.20700300  | 0.19938800  | 0.00000000  |
| H | 1.78045500  | 2.32234800  | 0.00000000  |
| H | -0.69511000 | 2.00226000  | 0.00000100  |
| H | -0.11285200 | -2.29706200 | 0.00000000  |
| H | 2.36424600  | -1.95651600 | -0.00000100 |
| H | 3.28263700  | 0.34860800  | -0.00000100 |
| N | -1.87068500 | -0.40329000 | 0.00000100  |
| N | -2.85696200 | 0.27505300  | -0.00000200 |
| H | -3.79665900 | -0.15228100 | 0.00000200  |

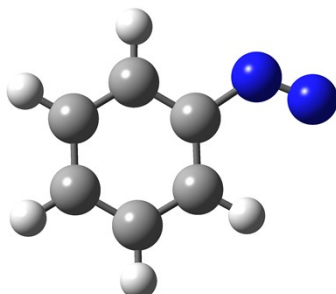

E

|   |             |             |            |
|---|-------------|-------------|------------|
| C | -1.27829700 | 1.31975900  | 0.00000000 |
| C | 0.09853200  | 1.11634900  | 0.00000000 |
| C | 0.59001000  | -0.19317800 | 0.00000000 |

|   |             |             |            |
|---|-------------|-------------|------------|
| C | -0.27046400 | -1.28967500 | 0.00000000 |
| C | -1.64919100 | -1.07593100 | 0.00000000 |
| C | -2.15224400 | 0.22645300  | 0.00000000 |
| H | -1.67329200 | 2.33203100  | 0.00000000 |
| H | 0.79657000  | 1.94785900  | 0.00000000 |
| H | 0.15029300  | -2.29051000 | 0.00000000 |
| H | -2.32779700 | -1.92408400 | 0.00000000 |
| H | -3.22589300 | 0.39290500  | 0.00000000 |
| N | 2.01634700  | -0.48555500 | 0.00000000 |
| N | 2.87651700  | 0.33114600  | 0.00000000 |

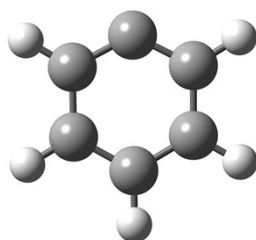

F

|   |             |             |             |
|---|-------------|-------------|-------------|
| C | -1.21419800 | 0.63260900  | -0.00000600 |
| C | -1.22640100 | -0.77179400 | 0.00002200  |
| C | -0.00001200 | -1.40013100 | -0.00001000 |
| C | 1.22640400  | -0.77178500 | -0.00000800 |
| C | 1.21421200  | 0.63258300  | 0.00001800  |
| C | -0.00000300 | 1.32471600  | -0.00000500 |
| H | -2.15467600 | 1.17909500  | -0.00002800 |
| H | -2.16291000 | -1.32331500 | -0.00000900 |
| H | 2.16288300  | -1.32336000 | -0.00002600 |
| H | 2.15466800  | 1.17910700  | 0.00001100  |
| H | 0.00002700  | 2.41128500  | -0.00002200 |

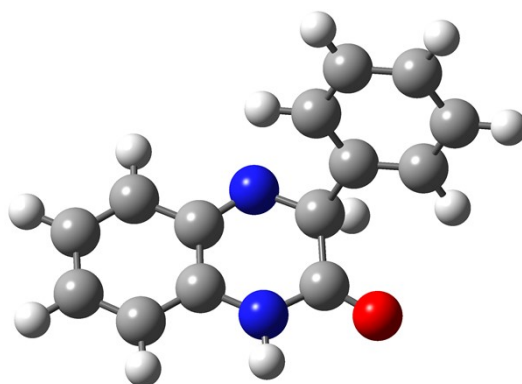

G

|   |             |             |             |
|---|-------------|-------------|-------------|
| C | -4.13468300 | -0.47772700 | -0.77696300 |
|---|-------------|-------------|-------------|

|   |             |             |             |
|---|-------------|-------------|-------------|
| C | -3.23542800 | 0.56255000  | -1.01751900 |
| C | -2.01548200 | 0.59782200  | -0.34682900 |
| C | -1.65744900 | -0.43647000 | 0.59119700  |
| C | -2.61638900 | -1.47558600 | 0.81467000  |
| C | -3.82262900 | -1.49617900 | 0.14549400  |
| H | -5.08302100 | -0.49504800 | -1.30571200 |
| H | -3.48350400 | 1.35132800  | -1.72392100 |
| H | -2.34298300 | -2.24490000 | 1.52975600  |
| H | -4.53336500 | -2.29704700 | 0.32632300  |
| C | 0.50465500  | 0.53323700  | 0.98361800  |
| C | 0.08735100  | 1.75578200  | 0.14784300  |
| H | 0.80304500  | 0.94892600  | 1.95773000  |
| N | -0.49881900 | -0.47879900 | 1.25104600  |
| N | -1.11071000 | 1.63481000  | -0.52590200 |
| H | -1.36924700 | 2.43549100  | -1.09300300 |
| O | 0.75877200  | 2.77041300  | 0.06632000  |
| C | 1.77354700  | -0.09162800 | 0.37176500  |
| C | 2.97091900  | 0.63629100  | 0.36933600  |
| C | 1.75117900  | -1.37386000 | -0.18431200 |
| C | 4.12566600  | 0.08793000  | -0.18661100 |
| H | 2.98812700  | 1.63817800  | 0.78601900  |
| C | 2.91087700  | -1.92202000 | -0.73710900 |
| H | 0.83139000  | -1.94846200 | -0.16809300 |
| C | 4.10027900  | -1.19404200 | -0.74100800 |
| H | 5.04799700  | 0.66292400  | -0.18337800 |
| H | 2.88113200  | -2.92142700 | -1.16358000 |
| H | 5.00248600  | -1.62195200 | -1.17014400 |

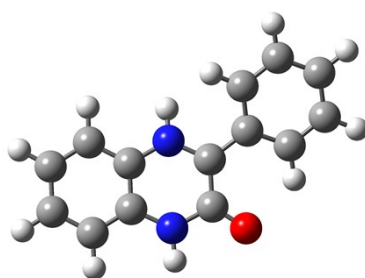

|   |            |             |             |
|---|------------|-------------|-------------|
|   | H          |             |             |
| C | 4.55952500 | -0.30239900 | 0.02092700  |
| C | 3.70977200 | 0.80126000  | 0.11249100  |
| C | 2.32519800 | 0.62768000  | 0.05670400  |
| C | 1.79040200 | -0.66975700 | -0.08396400 |
| C | 2.64887100 | -1.77048300 | -0.17901200 |
| C | 4.02969100 | -1.58636300 | -0.12774200 |

|   |             |             |             |
|---|-------------|-------------|-------------|
| H | 5.63436900  | -0.15528400 | 0.06346000  |
| H | 4.11556000  | 1.80388400  | 0.22126200  |
| H | 2.22744800  | -2.76685800 | -0.29020400 |
| H | 4.68842300  | -2.44616500 | -0.20200300 |
| C | -0.50360700 | 0.24505400  | -0.02765100 |
| C | 0.02856500  | 1.59569500  | 0.07601100  |
| N | 0.41008900  | -0.79842800 | -0.12624300 |
| N | 1.42638500  | 1.68524800  | 0.11850800  |
| H | 1.77083500  | 2.63359800  | 0.20187400  |
| O | -0.63390800 | 2.63252200  | 0.13854600  |
| C | -1.91749300 | -0.08161700 | 0.00477200  |
| C | -2.91532500 | 0.87991900  | -0.29207900 |
| C | -2.34919900 | -1.39580800 | 0.31429000  |
| C | -4.25994000 | 0.52812400  | -0.29836000 |
| H | -2.61163200 | 1.89421700  | -0.51200500 |
| C | -3.69802700 | -1.73596000 | 0.30203800  |
| H | -1.63210900 | -2.15148900 | 0.62533700  |
| C | -4.66553400 | -0.77896500 | -0.01049500 |
| H | -5.00254100 | 1.28556600  | -0.53594400 |
| H | -3.99449000 | -2.75099500 | 0.55399600  |
| H | -5.71894700 | -1.04452400 | -0.01915500 |
| H | 0.04161700  | -1.70814300 | -0.36841900 |

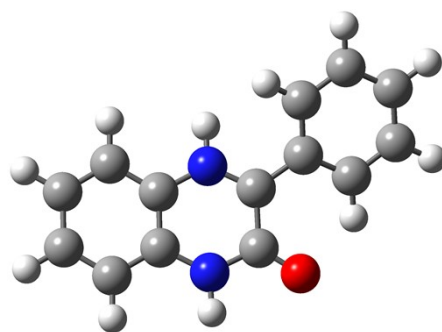

| I |            |             |             |
|---|------------|-------------|-------------|
| C | 4.53124300 | -0.30439800 | -0.00553100 |
| C | 3.70767700 | 0.80535800  | 0.12419300  |
| C | 2.31784700 | 0.63506300  | 0.07517300  |
| C | 1.78668300 | -0.65689500 | -0.10107000 |
| C | 2.62286300 | -1.77457900 | -0.23681000 |
| C | 3.99478000 | -1.59307100 | -0.18720800 |
| H | 5.60768900 | -0.17276600 | 0.03287300  |
| H | 4.12653900 | 1.79775700  | 0.26085200  |
| H | 2.19371900 | -2.76336800 | -0.37510000 |

|   |             |             |             |
|---|-------------|-------------|-------------|
| H | 4.65606800  | -2.44666000 | -0.28784200 |
| C | -0.49262000 | 0.20699600  | -0.01424200 |
| C | 0.04182400  | 1.60563300  | 0.12632200  |
| N | 0.39842000  | -0.77313200 | -0.14239400 |
| N | 1.42316300  | 1.68327700  | 0.18349900  |
| H | 1.77719600  | 2.62880700  | 0.30544100  |
| O | -0.66492200 | 2.59265900  | 0.20080900  |
| C | -1.90852500 | -0.09671000 | 0.00680600  |
| C | -2.86589600 | 0.85294000  | -0.42362500 |
| C | -2.35072100 | -1.37407900 | 0.43670000  |
| C | -4.21395800 | 0.51285400  | -0.44950700 |
| H | -2.54482000 | 1.83400900  | -0.74398000 |
| C | -3.69880200 | -1.69330400 | 0.41916800  |
| H | -1.65053100 | -2.09424500 | 0.85395800  |
| C | -4.63394500 | -0.75212400 | -0.03280900 |
| H | -4.94032700 | 1.24140800  | -0.79485000 |
| H | -4.02892600 | -2.66424400 | 0.77411500  |
| H | -5.68990200 | -1.00479600 | -0.04532200 |
| H | 0.03088600  | -1.71029800 | -0.29971500 |

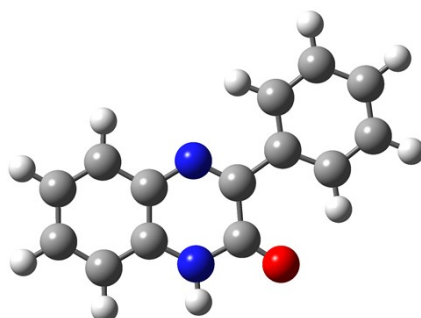

| 3aa |             |             |             |
|-----|-------------|-------------|-------------|
| C   | 4.52149900  | -0.35162900 | 0.00001400  |
| C   | 3.71628200  | 0.78021800  | -0.00005600 |
| C   | 2.32309300  | 0.62633300  | -0.00004500 |
| C   | 1.73596100  | -0.65941000 | 0.00003500  |
| C   | 2.57740200  | -1.78891200 | 0.00010100  |
| C   | 3.95525900  | -1.63853000 | 0.00008600  |
| H   | 5.60160900  | -0.23624400 | -0.00001300 |
| H   | 4.15239100  | 1.77612700  | -0.00012800 |
| H   | 2.10824300  | -2.76768000 | 0.00016100  |
| H   | 4.59919800  | -2.51266200 | 0.00015200  |
| C   | -0.44854900 | 0.19376100  | -0.00000100 |
| C   | 0.06328100  | 1.60655300  | -0.00004200 |
| N   | 0.37085000  | -0.82342700 | 0.00004000  |

|   |             |             |             |
|---|-------------|-------------|-------------|
| N | 1.44813700  | 1.69228900  | -0.00007800 |
| H | 1.80315100  | 2.64282700  | -0.00010700 |
| O | -0.60473100 | 2.63577100  | -0.00005700 |
| C | -1.90530900 | -0.09607100 | -0.00001300 |
| C | -2.89701000 | 0.90353800  | 0.00015700  |
| C | -2.31577500 | -1.44573300 | -0.00015500 |
| C | -4.24865900 | 0.55644800  | 0.00016700  |
| H | -2.60311200 | 1.94348300  | 0.00027800  |
| C | -3.66325900 | -1.78273100 | -0.00015100 |
| H | -1.55533800 | -2.21780600 | -0.00026300 |
| C | -4.63971900 | -0.78130400 | 0.00000600  |
| H | -4.99841300 | 1.34323100  | 0.00029900  |
| H | -3.95555500 | -2.82962400 | -0.00026400 |
| H | -5.69422700 | -1.04504300 | -0.00000800 |
